1 **Deep neural network automated segmentation of cellular structures in**  
2 **volume electron microscopy**

3  
4  
5 Benjamin Gallusser<sup>1,2,&</sup>, Giorgio Maltese<sup>1,&</sup>, Giuseppe Di Caprio<sup>1,3,&</sup>, Tegye John  
6 Vadakkan<sup>1</sup>, Anwesha Sanyal<sup>1,4</sup>, Elliott Somerville<sup>1</sup>, Mihir Sahasrabudhe<sup>1,5</sup>, Justin  
7 O'Connor<sup>6</sup>, Martin Weigert<sup>2</sup>, Tom Kirchhausen<sup>1,3,4,\*</sup>

8  
9  
10 <sup>1</sup>Program in Cellular and Molecular Medicine, Boston Children's Hospital, 200 Longwood Ave,  
11 Boston, MA 02115, USA

12 <sup>2</sup>Institute of Bioengineering, School of Life Sciences, École Polytechnique Fédérale de Lausanne,  
13 Switzerland

14 <sup>3</sup>Department of Pediatrics, Harvard Medical School, 200 Longwood Ave, Boston, MA 02115, USA

15 <sup>4</sup>Department of Cell Biology, Harvard Medical School, 200 Longwood Ave, Boston, MA 02115,  
16 USA

17 <sup>5</sup>Université Paris-Saclay, Centrale Supélec, Mathématiques et Informatique pour la Complexité  
18 et les Systèmes, 91190, Gif-sur-Yvette, France

19 <sup>6</sup>Department of Biological Chemistry & Molecular Pharmacology, Harvard Medical School, 200  
20 Longwood Ave, Boston, MA 02115, USA

21  
22 <sup>&</sup>Equal contribution

23  
24 \* Corresponding author:

25 Dr. Tom Kirchhausen

26 Harvard Medical School

27 200 Longwood Ave

28 Boston, MA 02115

29 [kirchhausen@crystal.harvard.edu](mailto:kirchhausen@crystal.harvard.edu)

30 ORCID 0000-0003-0559-893X

31 phone: +1 617 713 8888

32 fax: +1 617 713 8898

33

34 **Running title:** Computer-aided detection of cellular structures

35 **Keywords:** whole-cell FIB-SEM, deep learning, machine learning, *Automated Segmentation of*  
36 *intracellular substructures in Electron Microscopy* (ASEM), nuclear pores, clathrin coated pits and  
37 vesicles

## 38 **Summary**

39 Recent advances in automated segmentation using deep neural network models allow  
40 identification of subcellular structures. This study describes a new pipeline to train a convolutional  
41 network for rapid and efficient detection of structures of wide range in size and complexity.  
42

## 43 **Abstract**

44 Three-dimensional electron-microscopy is an important imaging modality in contemporary cell  
45 biology. Identification of intracellular structures is laborious and time-consuming, however, and  
46 seriously impairs effective use of a potentially powerful tool. Resolving this bottleneck is therefore  
47 a critical next step in frontier biomedical imaging. We describe ***Automated Segmentation of***  
48 ***intracellular substructures in Electron Microscopy*** (ASEM), a new pipeline to train a convolutional  
49 network to detect structures of wide range in size and complexity. We obtain for each structure a  
50 dedicated model based on a small number of sparsely annotated ground truth annotations from  
51 only one or two cells. To improve model generalization to different imaging conditions, we  
52 developed a rapid, computationally effective strategy to refine an already trained model by  
53 including a few additional annotations. We show the successful automated identification of  
54 mitochondria, Golgi apparatus, endoplasmic reticulum, nuclear pore complexes, clathrin coated  
55 pits and coated vesicles, and caveolae in cells imaged by focused ion beam scanning electron  
56 microscopy with quasi-isotropic resolution.

## 57 Introduction

58 Three-dimensional, high-resolution imaging provides a snapshot of the internal organization of a  
59 cell at a defined time point and in a defined physiological state. Focused ion beam scanning  
60 electron microscopy (FIB-SEM) yields nearly isotropic, nanometer-level resolution, three-  
61 dimensional images by sequential imaging of the surface layer of a sample, which is then etched  
62 away with an ion beam to reveal the layer beneath. FIB-SEM technology continues to develop,  
63 and it can be a particularly valuable contemporary tool for imaging the complete volume of a cell,  
64 but segmentation of the three-dimensional data sets and subsequent analysis of the results are  
65 substantial hurdles, as the images are far too large to interpret by inspection (Heinrich et al., 2021)

66  
67 The widespread success of machine learning in bioimage informatics has recently inspired the  
68 application of deep-learning approaches to automated segmentation. Examples using deep  
69 convolutional networks for data with anisotropic resolution include DeepEM3D (Zeng et al., 2017)  
70 and CDeep-3M (Haberl et al., 2018), for segmentation of mitochondria and Golgi apparatus with  
71 extensive post-processing (Mekuč et al., 2020, 2022), as well as cell-organelle segmentation in  
72 quasi-isotropic FIB-SEM data of beta cells (Müller et al., 2020). A pipeline created by the COSEM  
73 project (Heinrich et al., 2021) enables automated whole-cell segmentation of 35 organelles from  
74 relatively sparse but very precise 3D ground truth annotations from FIB-SEM data of cells  
75 prepared by high pressure freezing and freeze substitution (HPFS), obtained at 3-5 nm voxel size  
76 with approximately isotropic resolution. The most common strategy used by the COSEM project  
77 involved training with ground truth annotations from 2-3 different classes of objects at the same  
78 time, typically at a high computational cost (500,000 or more training iterations) (Heinrich et al.,  
79 2021).

80  
81 The current approaches all suffer from a demand for substantial computational resources, and  
82 they generally require a large set of precise manual annotations. Both requirements limit their  
83 practical applicability. We describe here the development and use of a new deep learning pipeline  
84 called *Automated Segmentation of intracellular substructures in Electron Microscopy* (ASEM),  
85 which can detect structures of a wide range in size and complexity using deep neural networks  
86 trained on a limited number of loosely marked ground truth annotations. ASEM includes a semi-  
87 automated graph-cut procedure we developed to assist in the tedious task of ground truth  
88 preparation and a computationally efficient transfer-learning approach with a fine-tuning protocol  
89 that can be used without the need for high-end specialized CPU/GPU workstations.

90

91 We illustrate here the utility of ASEM by describing the results of its application to data from  
92 several types of cells, including FIB-SEM images made publicly available by the COSEM Project  
93 (Heinrich et al., 2021). We note that while cellular samples have traditionally been processed by  
94 chemical fixation (CF) and staining at room temperature, HPFS at cryogenic temperatures (as  
95 was the case for the COSEM Project data) yields a substantial increase in the preservation of  
96 many complex cellular features. We applied ASEM to three-dimensional FIB-SEM images of cells  
97 prepared by either CF or HPFS. We validated our approach by segmenting mitochondria,  
98 endoplasmic reticulum (ER) and Golgi apparatus, as these organelles had been studied  
99 previously in similar efforts (Mekuč et al., 2020, 2022)(Heinrich et al., 2021; Liu et al., 2020), and  
100 then used ASEM to recognize much smaller structures, nuclear pores and clathrin coated pits  
101 and vesicles. For nuclear pores in interphase, we can segment nearly all the pores in the nuclear  
102 membrane. We can therefore directly analyze the range of membrane-pore diameters, even for  
103 a single cell in a particular physiological state. For clathrin coated pits, we show that a relatively  
104 restricted training set leads to accurate segmentation of coated pits at all stages of their  
105 maturation as well as coated vesicles, the final step after fission from the originating membrane,  
106 and we can derive morphological metrics consistent with the classical constant-growth assembly  
107 model (Ehrlich et al., 2004; Kirchhausen, 1993, 2009; Willy et al., 2021).

108

109 All datasets, code and models are open-source (<https://github.com/kirchhausenlab/incasem>,  
110 <https://open.quiltdata.com/b/incasem>), so that other users working with images acquired with the  
111 same or somewhat different imaging conditions can generate their own predictive models and  
112 benefit from our pre-trained models, either directly or by adapting them by fine-tuning, without the  
113 need for specialized CPU/GPU workstations.

## 114 **Results**

### 115 **FIB-SEM imaging of cells**

116 We obtained three-dimensional focused ion beam scanning electron microscopy (FIB-SEM) data  
117 sets for different types of adherent mammalian cells grown in culture (Table S1). The samples  
118 we imaged were prepared either by conventional chemical fixation and staining with osmium and  
119 uranyl acetate at room temperature (CF) or by fixation and similar staining at very low temperature  
120 using high pressure freezing and freeze substitution (HPFS), a protocol that substantially  
121 increases sample preservation (Hoffman et al., 2020; Studer et al., 2008; Xu et al., 2021). To  
122 image a volume of a cell, we used a block-face crossbeam FIB-SEM with nominal isotropic  
123 resolution of 5 or 10 nm per voxel; each image stack, obtained during 1-2 days of continuous FIB-  
124 SEM operation, was about 15-20 GB in size and contained ~ 2000 registered sequential TIFF  
125 files and spanned a volume of roughly  $2000^3$  voxels corresponding to large parts of each cell.  
126 These volume datasets were used to train the deep learning pipeline for automated segmentation  
127 of subcellular structures and to explore the effects of different fixation and staining procedures on  
128 the outcome of the segmentation tasks.

129

130 We also tested the performance of our deep learning models with a small number of FIB-SEM  
131 images from HPFS preparations of complete cells, obtained from the publicly available  
132 OpenOrganelle initiative (Xu et al., 2021) (Table S1). They were acquired by the COSEM team at  
133 Janelia Research Campus at a nominal resolution of  $4 \times 4 \times 3-5$  nm per voxel with a custom-  
134 modified FIB-SEM as part of their concurrent efforts to develop methodology for automated  
135 organelle segmentation aided by deep learning.

136

137 As described below, using the specific models generated with our deep learning pipeline (Fig. 1),  
138 we could reliably identify subcellular structures ranging in size and complexity from mitochondria,  
139 endoplasmic reticulum, Golgi apparatus to nuclear pores, clathrin coated pits, coated vesicles,  
140 and caveolae.

141

### 142 **Ground truth annotation**

143 The first step in any common machine-learning procedure is to create pixelwise "ground truth"  
144 annotations -- to be used for training a specific segmentation model. In the present work, we used  
145 a modest number of relatively loosely annotated manual segmentations of the subcellular  
146 structure of interest (see Methods for details). These segmentations came from arbitrarily chosen,  
147 diverse, and not necessarily overlapping regions from one or more cells (Table S2). As the

148 contrast and textural appearance of raw FIB-SEM images can vary substantially due to sample  
149 preparation and imaging conditions, we make heavy use of augmentations, a technique  
150 commonly used to train deep neural networks (Shorten and Khoshgoftaar, 2019). We applied a  
151 series of randomized transformations to each of the manual segmentations to generate a set of  
152 the required size (see Methods and Table S3). The various applications described here validate  
153 this approach, which greatly reduces the manual annotation effort and makes broad application  
154 feasible.

155

156 We obtained ground truth annotations for mitochondria and Golgi apparatus, portions of  
157 endoplasmic reticulum (ER), 19 endocytic clathrin coated pits at the plasma membrane, and 12  
158 nuclear pores on the nuclear envelope (Table S4). We annotated mitochondria using the carving  
159 module in Ilastik (Berg et al., 2019) and if required, edited the annotation manually using VAST  
160 (Berger et al., 2018), a volume annotation and segmentation tool for manual and semi-automatic  
161 labeling of large 3D image stacks (see example in Fig. S1 and Video 1). We annotated the more  
162 complex Golgi apparatus and ER with a dedicated graph cut-assisted, semi-automated annotation  
163 tool we developed and describe in Methods that accelerated the annotation time by 5-10-fold;  
164 when needed, we corrected the annotation locally with VAST (see example in Fig. S2). We  
165 generated manually, also with VAST, the ground truth annotations for clathrin coated structures  
166 and nuclear pores. In all cases, we applied the data augmentation procedure to the curated  
167 manual annotations.

168

### 169 **Deep learning segmentation pipeline**

170 Our general training strategy (schematically represented in Fig. 1A) relied on a 3D convolutional  
171 neural network (CNN) architecture based on a 3D U-Net (Çiçek et al., 2016) (Fig. S3); this  
172 approach has been used previously for segmenting intracellular structures in electron microscopy  
173 data (Heinrich et al., 2021; Plaza and Funke, 2018). For each organelle class, we used a single,  
174 dedicated deep neural network, trained on augmented ground truth annotations generated from  
175 a small number of annotations contained within subvolumes ( $\sim 2\text{-}80\ \mu\text{m}^3$ ) of the FIB-SEM data  
176 (Table S4). We used binary cross entropy as a loss function and trained each model for roughly  
177 100k iterations on a single GPU ( $\sim 23\text{h}$ ), after which the training/validation loss converged to a  
178 stable value (Fig. S4). To avoid overfitting, we cross-validated the evolution of the model  
179 periodically during the training session, by monitoring the loss between the model prediction and  
180 the subset of ground truth annotations in validation blocks of the FIB-SEM image not used for  
181 training. The final model yielded a predicted map that assigned to each voxel a probability of

182 belonging to the structure (Fig. 1B), from which we derived a final binary map by setting a  
183 threshold value of 0.5. These models, unique for a given organelle or structure, were then used  
184 to find the specific cellular structure of interest in the FIB-SEM images of regions excluded from  
185 training or of fully naïve cells that had not been used for training at all.

186

187 As previously noted by others, we also observed that the image contrast and texture of FIB-SEM  
188 data can vary substantially between different acquisitions, depending not only on cell type and  
189 mode of sample preparation (CF, HPFS), but unexpectedly also between adjacent cells of the  
190 same type in the same Epon block (Fig. S5). We found empirically that while the neural network  
191 could be trained to segment organelles successfully from samples prepared by the same mode  
192 of preparation, a model trained with ground truth annotations from HPFS cells failed when applied  
193 to CF treated cells, and vice versa. Although routinely implemented in our pipeline, contrast  
194 normalization by contrast-limited adaptive histogram equalization (CLAHE) (Pizer et al., 1987;  
195 Zuiderveld, 1994) of FIB-SEM data sets from different cells failed to improve the predictions  
196 (Table S5). Novel use of local shape descriptors as an auxiliary learning task (Sheridan et al.,  
197 2021) calculated from the ground truth annotations and representing high-level morphological  
198 notions such as object size and distance to object boundary also did not improve model prediction.  
199 As described below in detail, we resolved this problem by combining ground truth annotations  
200 from both data sets for training.

201

## 202 **Automated segmentation of organelles**

203 We first applied ASEM to perform automated segmentation of FIB-SEM images from cells  
204 prepared by CF of nominal 5 nm isotropic resolution and relatively high contrast (Fig. 2 and Video  
205 2); the summary shown in Table S6 illustrates the predictive performance obtained for models  
206 specific for mitochondria, ER and Golgi apparatus. For mitochondria, we selected from Cell 1 a  
207 training block of about  $462 \times 10^6$  voxels and used semi-automated annotation to generate ground  
208 truth annotations for the mitochondria contained within this volume, representing roughly 8% of  
209 all voxels (Table S6); Model performance was assessed every 1,000 iterations during the training  
210 phase by calculating the cross-entropy loss between the current prediction and the mitochondria  
211 ground truth within a validation block (not used during training). Additional smaller validation  
212 blocks (Table S4) containing mitochondria ground truth from naïve Cells 2, 3 and 6 were used to  
213 avoid overfitting during the training phase and to validate the model performance by measuring  
214 the validation losses. Validation losses rapidly converged within 20,000 - 40,000 training  
215 iterations, resulting in a relatively high F1 score (0.91) for Cell 1 and lower values for the data



216 from naïve Cells 2, 3 and 6 (0.47, 0.66, 0.81, cf. Table S6). Similar results were obtained when  
217 training with ground truth annotations from Cell 2 instead of Cell 1 (Table S6); the validation losses  
218 also converged within 20,000-40,000 training iterations with good F1 scores for Cell 2 (0.87) and  
219 naïve Cells 1 and 3 (0.89, 0.74) and a slightly lower score for Cell 6 (0.7) with no further  
220 improvement with additional training iterations.

221

222 To find additional ways to enhance the generalization ability of the model, we modified the training  
223 pipeline to combine the ground truth annotations from Cells 1 and 2. We first tested the  
224 performance of the mitochondria model using the validation blocks in naïve Cells 3 and 6. In this  
225 case, the new model had a significantly improved performance (Table S6), reflected by even  
226 higher F1 scores for naïve Cells 3 and 6 (0.75, 0.88), but only after 95,000 - 115,000 iterations  
227 (Fig. S4). A similar improvement in model performance was observed for ER predictions when  
228 we first combined ground truth annotations of Cells 1 and 2. The new ER model, then used to  
229 predict ER in Cells 1, 2 and naïve Cells 3 and 6, led to generally improved F1 scores of 0.95,  
230 0.90, 0.92 and 0.77, respectively (Table S6). Consistent with F1 scores smaller than the optimal  
231 value of 1, we observed by visual inspection a small number of false negative (yellow arrows) or  
232 false positive (red arrows) assignments as highlighted in Fig. 2A (see also Movie 2). Combining  
233 ground truth annotations from Cells 19 and 20 during training to predict the more complex Golgi  
234 apparatus in naïve Cells 3 or 6 marginally outperformed the models trained with either Cell 1 or  
235 Cell 2 (Table S6), also illustrated with one example of visual inspection of ground truth annotations  
236 and predictions showing instances of false positive assignments (red arrows, Fig. 2B). Thus, the  
237 predictive performance of a model could often be improved by using a model obtained by jointly  
238 training with ground truth annotations from two cells instead of training with data from one cell or  
239 the other.

240

241 We also tested the performance of ASEM using FIB-SEM images and ground truth annotations  
242 acquired by the OpenOrganelle initiative (Xu et al., 2021) (Table S1). These cells were prepared  
243 by HPFS and imaged with higher isotropic resolution (4 x 4 x 3-5 nm) but lower contrast). We  
244 examined the ability of our training pipeline to segment these data sets and focused on  
245 mitochondria and ER but not Golgi due to a lack of a sufficient number of ground truth annotations  
246 for Golgi objects in the available OpenOrganelle datasets (Table S7). We generated independent  
247 models for mitochondria and ER, by training with corresponding combined ground truth  
248 annotations from HeLa Cells 19 and 20, followed by model performance verification using unseen  
249 ground truth annotations from the same HeLa cells or from different types of naïve cells not used

250 for training (Cell 21 Jurkat-1 and Cell 22 Macrophage-2, Table S7). Our pipeline performed well  
251 after ~ 100K training cycles and managed to segment mitochondria in unseen data from each of  
252 the two HeLa cells used for training (F1 scores of 0.99, Table S7) and from unseen data from each  
253 of the naïve Cell 21 Jurkat-1 or Cell 22 Macrophage-2 (F1 scores of 0.94 and 0.93; Table S7).  
254 Automated segmentation of the ER was less efficient, requiring ~ 200K training cycles to reach  
255 the highest model performance (F1 scores of 0.91, 0.80, 0.48 and 0.81, respectively; Table S7).  
256 These first results indicate that our training strategy can create predictive models for successful  
257 identification of mitochondria, ER and Golgi apparatus in cells prepared by CF and of  
258 mitochondria and Golgi in samples prepared by HPFS.

259  
260 To test the strength of combining ground truth annotations from two cells to train and then predict  
261 on a naïve cell, we explored the tolerance of the training pipeline to modest variations in image  
262 resolution. The results are shown for the representative FIB-SEM images in Figs. 3 and 4 and  
263 Video 3 and 4 obtained for a naïve Cell 15 SVG-A prepared by HPFS acquired at an isotropic 5  
264 x 5 x 5 nm (Table S4); visual inspection of the images show successful predicted segmentations  
265 for mitochondria, ER and Golgi apparatus using models obtained by combined training with  
266 ground truth annotations from HeLa cells 19 and 20 also prepared by HPFS and whose FIB-SEM  
267 images were acquired with mixed resolutions of 4 x 4 x 5.2 and 4 x 4 x 3.2 nm, respectively.

268  
269 Because models generated with mitochondria or ER ground truth annotations from cells prepared  
270 by CF were unable to predict well on cells prepared by HPFS and vice versa, we explored the  
271 possibility of combining training data from both sample preparation protocols, using the same  
272 training datasets from HEK293A Cells 1 and 2, prepared by CF, and Cells 19 and 20 HeLa  
273 prepared by HPFS. The mitochondria and the ER models performed nearly as well as specialized  
274 single-organelle models on almost all validation data sets regardless of sample preparation  
275 protocol used (Fig. 5, panel A and Table S8).

276

### 277 **Fine-tuning**

278 To improve the predictive performance with images from naïve cells, we explored the effect of  
279 fine-tuning a pre-existing model on its segmenting accuracy, a simple implementation of transfer  
280 learning (Weiss et al., 2016). As described in Methods, we started with an already trained model  
281 and resumed model training for a low number of iterations (15,000) using only the new ground  
282 truth annotations from the naïve cell; the new ground truth annotations, although resembling those  
283 used for the first training, would typically have slightly different characteristics.

284

285 The following examples illustrate the range of results obtained upon implementation of fine-tuning  
286 using HPFS FIB-SEM data. The ER model, first obtained after ~ 180,000 training cycles using  
287 ground truth annotations from HeLa Cells 19 and 20, was then fine-tuned for additional 12,000 or  
288 6,000 training cycles with small amounts of ground truth data from either naïve Cell 21 Jurkat-1  
289 or Cell 22 Macrophage-2; both fine-tuning cases showed a significant improvement in the F1  
290 precision scores, from 0.48 to 0.69 and from 0.81 to 0.90, without affecting recall (Fig. S6, Table  
291 S9); in other words, the model learned to correctly classify ER while at the same time reducing  
292 the number of false positives by rejecting structures that appeared similar but did not belong to  
293 the same semantic class (Fig. 5B). The next two cases of fine tuning illustrate little or no  
294 improvement in predictive model performance for mitochondria in cells prepared by HPFS or CF  
295 (Fig. 5C, S6 and Table S9). The model obtained after 95,000 training cycles using HPFS FIB-  
296 SEM data from HeLa Cells 19 and 20 showed similar F1 scores (0.93) for naïve Cell 21 Jurkat-1  
297 or Cell 22 Macrophage-2 before or after fine-tuning for 7,000 cycles. Similarly, a mitochondria  
298 model obtained after 95,000 training iterations using CF FIB-SEM data from Cells 1 and 2 and  
299 then fine-tuned for additional 6,000 fine-tuning training steps using ground truth annotations from  
300 Cells 3 or 6 showed either a significant increase (from 0.75 to 0.88) or no increase at all (0.88) in  
301 F1 scores, respectively (Fig 5D and Table S9). The fine-tuning strategy could not adjust  
302 mitochondria, ER or Golgi apparatus models generated using cells prepared by HPFS to predict  
303 in naïve CF treated cells, and vice versa. We conclude that fine-tuning can be beneficial for  
304 segmenting relatively large membrane-bound organelles particularly in cases where the pre-  
305 trained model behaved poorly in naïve cells, but it could not resolve situations in which the staining  
306 characteristics of the samples were extremely different, even though they had been prepared by  
307 the same staining procedures.

308

### 309 **Automated segmentation of nuclear pores**

310 To test whether our pipeline can automatically identify and segment small subcellular structures,  
311 we trained the neural network with ground truth annotations from nuclear pores, structures  
312 embedded in the double-membrane nuclear envelope with membrane pore openings of ~100-  
313 120 nm in diameter. We used FIB-SEM data with nominal 5 nm isotropic resolution from  
314 interphase SVG-A and HeLa cells imaged using HPFS to ensure minimal perturbations in the  
315 structural organization of the nuclear pores and their surrounding inner and outer nuclear  
316 membranes.

317

318 We used VAST to generate ground truth annotations for ten nuclear pores from Cell 13a - SVG-  
319 A (5 x 5 x 5 nm isotropic resolution) (Table S4). The segmentations, representing the inner and  
320 outer nuclear membrane envelope contours immediately adjacent to nuclear pores, also included  
321 5 additional pixels (~ 25 nm) of inner and outer nuclear membrane extending away from the  
322 nuclear pore opening (Fig. 6A). Training was performed with the augmented data generated from  
323 only eight nuclear pores (with two additional objects for validation), resulting in a nuclear pore  
324 model that performed well after 100,000 training cycles (F1=0.52, Precision=0.35, Recall=0.99,  
325 Table S8). In all cases, the high recall score was consistent with a perfect correspondence to all  
326 the voxels that defined the ground truth annotations. The relatively low F1 and precision scores  
327 reflected 'fatter' predictions due to voxels assigned to positions immediately adjacent to the 'single  
328 row' of voxels overlapping the nuclear pores in the ground truth annotations. Visual inspection  
329 confirmed accurate identification of all nuclear pores in naïve SVG-A cells 15 (Video 4) and 17 (5  
330 x 5 x 5 nm isotropic resolution) and Cell 19 Hela (4 x 4 x 5.2 nm) not used for training (Fig. 6B).  
331 Because of the high predictive accuracy attained with this simple nuclear pore model (Video 4), it  
332 was not necessary to improve the model using our more extended training pipelines.

333

334 Based on ensemble cryo EM data from thousands of nuclear pores that provide a unique atomic  
335 model per data set (Schuller et al., 2021), combined with more selective images of single nuclear  
336 pores obtained using cryo tomography of yeast cells in different physiological states (Zimmerli et  
337 al., 2021), it is now believed that the diameter of the nuclear pore varies in response to the  
338 physiological state of the cell. It is not known, however, to what extent this size variability occurs  
339 within a single cell in a unique physiological state. Taking advantage of our automated  
340 segmentation pipeline that makes it practical to analyze hundreds of single nuclear pores, we  
341 explored the extent by which their membrane pore diameters varied within a single cell. Inspection  
342 of the nuclear membrane surrounding the pores viewed along the axis normal to the nuclear  
343 envelope confirmed the radial symmetry of the pore (Fig. 6B) with a relatively broad and  
344 continuous variation in membrane pore diameter, ranging from 60 to 130 nm (median 92 nm, with  
345 75-108 nm 10-90 percentile range: n= 934; 305, 135, and 494 pores from SVG-A Cells 15 and  
346 17, and Hela Cell 19, respectively) (Fig. 6C); these values were obtained by measuring in the raw  
347 images the distances between the peak signals at opposite ends of the nuclear membrane pore  
348 (see Methods and Fig. S7 A-D). The membrane pore sizes did not follow a normal distribution,  
349 but instead had a slight asymmetry contributed by smaller species. They were also distinct from  
350 the Gaussian fit (blue, Fig. 6C) corresponding to the expected size distribution if the data would  
351 have originated from a single pore size centered on the most abundant species. We found no

352 evidence to suggest presence of spatial correlation between pore diameter and different regions  
353 of the nuclear envelope within the cell, for example away from the cover slip or normal to this  
354 surface, nor did we find evidence of local clustering of pores with a favored size (Fig. 6D and  
355 S7E).

356

### 357 **Automated segmentation of clathrin coated pits, coated vesicles and caveolae**

358 As a further test of ASEM with relatively small structures, we chose clathrin coated pits, 30-100  
359 nm membrane invaginations in the plasma membrane and the trans Golgi network (TGN) involved  
360 in selective cargo traffic (Kirchhausen, 2000). We trained the model with ground truth annotations  
361 from 15 endocytic plasma membrane coated pits of different sizes and shapes thus representing  
362 different stages of clathrin coat assembly. While the resolution of the FIB-SEM was insufficient  
363 to discern the familiar spikes or the hexagonal and pentagonal facets of a clathrin coat as seen  
364 in samples imaged by TEM, the presence of strong membrane staining, which we attribute to  
365 clathrin and associated proteins (Fig. 7A), made these invaginations recognizably distinct from  
366 caveolae, which are smaller (50 – 100 nm) flask-shaped invaginations and lack enhanced  
367 membrane staining (Fig. 7B). None of the cells had recognizable regions of strongly stained, flat  
368 membrane, often found on the coverslip-attached surface of cells in culture and in other  
369 specialized locations (Akisaka et al., 2008; Grove et al., 2014; Heuser, 1980; Maupin and Pollard,  
370 1983; Saffarian et al., 2009; Signoret et al., 2005). We used VAST to generate the coated-pit  
371 ground truth annotations, which were simply a collection of single traces loosely overlapping the  
372 endocytic membrane invagination (Fig 7A, blue).

373

374 The coated pit model obtained after 80,000-100,000 training iterations combined 15 ground truth  
375 annotations we made, six from Cell 12 HeLa and nine from Cell 13 HeLa imaged by the COSEM  
376 project. Visual inspection of the predictions generated by this relatively simple training in parts of  
377 HeLa cells 12 and 13 cells that had not been used for training showed accurate recognition of all  
378 endocytic coated pits (representative example in Fig. 7B); we obtained similar results from naïve  
379 SVG-A cells 15 (Video 4) and 17, and HeLa cell 19. The model also identified all coated pits in the  
380 TGN (Fig. 7B). It incorrectly identified caveolae as coated pits (Fig 7B), but we could detect no  
381 other incorrect predictions anywhere in the cell volume. Sharply invaginating curvature of the  
382 stained membrane outline thus appears to be an important component of the pattern the model  
383 learned to recognize.

384

385 We used our additional annotated ground truth annotations from HeLa Cells 12 and 13 that had  
386 not been included in the training set to calculate F1, recall and precision scores (Table S8). In all  
387 cases, the high recall score (0.99) demonstrated the almost perfect reconstruction of all voxels  
388 belonging to the ground truth annotations. The relatively low F1 and precision scores (~ 0.65 and  
389 0.51) were due to incorrect voxel predictions immediately adjacent to the 'single row' of true voxel  
390 assignments overlapping the invaginated membrane in the ground truth annotations (Fig. 7A, B).

391

392 The model also recognized vesicles near the plasma membrane and the TGN that an expert  
393 human observer would have interpreted from their staining to be clathrin coated vesicles, even  
394 though training of the model did not include ground truth annotations representing them (Fig. 7B).  
395 We confirmed that the model recognized *all* the presumptive coated vesicles in a cell, by visual  
396 inspection across the full volumes of HeLa cells 12 and 13, as well as of three cells that did not  
397 contribute at all to the training set, SVG-A cells 15 and 17 and HeLa cell 19. Training on endocytic  
398 coated pits thus also allowed recognition of endocytic coated vesicles and TGN coated pits.

399

400 We took advantage of the large, combined set of three-dimensional image data from coated pits  
401 and vesicles to analyze assembly stages using the metrics depicted in Fig. S8). We determined  
402 the depths and widths at  $\frac{1}{2}$  depth for each of the membrane invaginations in SVG-A cell 17 (Fig.  
403 7C). Caveolae, recognized by the absence of an enhanced membrane signal, were relatively  
404 small, with narrow distributions of depths and widths centered on 61 and 81 nm (Fig. 7C).  
405 Endocytic coated pits, identified by their enhanced membrane signals, were generally larger than  
406 caveolae and had wider distributions of depths and widths, which clustered into two groups.  
407 Coated pits with open necks (>40 nm) had shallow, ~ 50 nm invaginations; those with narrower  
408 necks (~ 10 to 40 nm) had deep, ~ 100-130 nm invaginations (Fig. 7D, left and central panel, and  
409 7E, right panel). Endocytic coated pits and vesicles were also larger than the corresponding  
410 structures emanating from internal membranes associated with the TGN (Fig. 7D, left panel).

411

412 The eccentricity of the assembling pit, defined as the ratio of major and minor axes of the ellipsoid  
413 that fit best to a given membrane profile, showed a relatively narrow and overlapping distribution  
414 (Fig. 7D, right panel), ranging from 1 (symmetric) and 1.6 (less symmetric) for endocytic pits and  
415 vesicles. Most of the pits and vesicles associated with internal membranes in SVG-A Cell 17 (Fig.  
416 7D, right panel) had eccentricities close to 1; in those cases, the major axis of most pits was  
417 orthogonal to the plane from which the pits invaginated. Similar results were obtained for SVG-A  
418 cell 15 and HeLa cells 12 and 13 (Fig. S19, A-C). These results are consistent with a budding

419 mechanism in which stepwise growth of the clathrin coat drives invagination of the membrane,  
420 ultimately creating a constriction, as the curved clathrin lattice approaches closure, that is narrow  
421 enough for dynamin to pinch off the nascent vesicle (Kirchhausen et al., 2014).

## 422 **Discussion**

423 The automated 3-D image segmentation pipeline embodied in ASEM overcomes three critical  
424 hurdles for making FIB-SEM more practical and more broadly useful than currently available  
425 procedures. (1) Our graph-cut based annotation approach facilitates and simplifies the manual  
426 stages of the analysis, especially when combined with data augmentation that minimizes the  
427 number of hand-curated annotations. Between 8 and 16 annotated ground truth annotations  
428 encompassing the complete volumes of smaller objects or partial volumes of larger ones were  
429 generally enough when augmented as described. We used rough rather than voxel-precise  
430 labeling to delineate the outline of the subcellular structures for which we were training. While this  
431 strategy was effective for our training pipeline, it was much less time-consuming than the precise  
432 delineation efforts used by COSEM. We could then readily correct any erroneous voxel  
433 detections, either by manual intervention or by automatic post-processing. (2) For the applications  
434 described here, ASEM requires far less computational effort than does COSEM or other  
435 approaches, largely because we restrict the training to a single type of structure and thus create  
436 a separate model for each type. Consequently, we found that about ~100,000-150,000 training  
437 iterations were sufficient for accurate prediction, whereas COSEM required five times as many.  
438 (3) We can substantially improve the success rate in a completely naïve cell by using a model  
439 trained on ground truth annotations from another cell and re-training by a simplified transfer-  
440 learning approach with a very small number of ground truth annotations from the new cell, thereby  
441 adapting the model to a cell with slightly different imaging characteristics at the cost of modest  
442 additional segmentation and computational effort. In the examples here, just 5,000-10,000 training  
443 iterations were enough to increase prediction accuracy throughout the rest of that cell.

444  
445 To test the robustness and flexibility of ASEM, we used the model trained with ER ground truth  
446 annotations from cells in interphase for identifying and segmenting ER in an early anaphase  
447 mitotic cell. The model, which had correctly identified and segmented the complete ER in a naïve  
448 interphase cell, also accurately identified and segmented the ER in the mitotic cell. The result is  
449 non-trivial, because relatively extended, fenestrated, double-membrane sheets, with small  
450 interconnecting tubules, dominate the morphology of the mitotic ER, while tubules of varying  
451 lengths, connecting much smaller sheets, are the principal structures in the interphase ER.  
452 Segmenting the mitotic ER required less than an hour; it would have taken a human annotator  
453 several weeks. Previous analyses were limited to small cell volumes precisely because of this  
454 constraint. We further showed that automatic segmentation of the Golgi apparatus with ASEM  
455 confirmed the results described by the COSEM Project team (Heinrich et al., 2021). The Golgi is



456 not a stack of closely packed, uniform cisternae, as often diagrammed in textbooks. Rather, each  
457 member of the stack is a complex, perforated structure of variable shape, surrounded by many  
458 small vesicles.

459

460 We used automatic segmentation of mitochondria, ER and Golgi apparatus primarily for  
461 comparison with published results from other methods, to validate the features of ASEM designed  
462 to accelerate and simplify the entire pipeline. We turned to smaller subcellular structures as tests  
463 of new and potentially more challenging applications. Nuclear pores are more homogenous than  
464 larger organelles, and thus in principle easier to recognize, but any one pore has much less spatial  
465 information than does a Golgi stack or a mitochondrion, and as we have found, the diameter of  
466 the membrane pore varies even across the nucleus of single cells at a fixed time point, despite  
467 the likely invariance of much of the nuclear pore complex protein assembly. Clathrin coated pits  
468 are both small (on the scale of the ER and Golgi apparatus) and variable, in size and as well as  
469 in assembly stage. In both cases, by training ASEM with a large set of ground truth annotations  
470 generated by data augmentation from a very small number of hand-annotated objects, we could  
471 automatically identify essentially all the objects in the cell, despite the variable diameter of the  
472 nuclear membrane pore and the variable size and stage of completion of a clathrin coated pit.  
473 Moreover, a model trained on plasma-membrane coated pits identified coated pits in the Golgi  
474 and free clathrin coated vesicles in the cytosol.

475

476 The osmium-uranyl staining in current FIB-SEM sample preparation, for both CF and HPFS,  
477 preferentially marks lipid headgroups, proteins and nucleic acids. Although with the training set  
478 used here, the model did not distinguish between clathrin coated pits and caveolae, the eye clearly  
479 picks up the much heavier staining of the former (Fig. 7). The model correctly retrieved clathrin  
480 coated vesicles, as well as coated pits in the TGN, and distinguished them from COPI and COPII  
481 vesicles which carry cargo between the Golgi apparatus and the ER, perhaps because they are  
482 smaller structures, of substantially sharper curvature than the clathrin coated structures the model  
483 had learned to recognize. How well the model will find protein-dominated structures -- e.g., virus  
484 assembly intermediates -- remains to be determined.

485

486 Imaging the entire volume of a single cell at ~5 nm resolution can answer questions that are much  
487 harder to tackle by methods such as cryo-tomography that access at somewhat higher resolution  
488 only a small slice of a cell. One example is our finding, that nuclear pores vary in size across the  
489 nuclear membrane and hence that the variability identified by cryo-tomography is present at an

490 arbitrary time point in a single cell. The deep-learning protocols we have developed, and the  
491 readily implemented and freely accessible analysis tools we provide, form an experimental  
492 pipeline that will run entirely on commercially available workstations. We suggest that EM volume  
493 imaging will prove to be a powerful complement to the live-cell fluorescence volume imaging  
494 afforded by lattice light-sheet microscopy.  
495

## 496 **Material and methods**

### 497 **Chemical Fixation, dehydration and embedding**

498 Cells plated on glass coverslips were processed for chemical fixation (CF) by incubation for 30  
499 minutes at room temperature with 0.2% glutaraldehyde (Electron Microscopy Science,  
500 Cat.16220) and 2.5% paraformaldehyde (PFA, Electron Microscopy Science, Cat. 15700)  
501 dissolved in 0.1M PIPES buffer (pH 7.4, Sigma-Aldrich, Cat. P6757), followed by a rinse with 0.1M  
502 PIPES buffer. A 2% OsO<sub>4</sub> aqueous solution (Electron Microscopy Sciences) dissolved in 0.1M  
503 PIPES, pH 7.4 was used to stain the cells for 1 hour at RT, followed by incubation for another 1  
504 hour at RT in a solution containing 2.5% potassium ferrocyanide (Sigma-Aldrich) in 0.1 M PIPES,  
505 pH 7.4. The cells were rinsed three times at five-minute intervals with deionized ultrapure water  
506 followed by a 30-minute incubation at RT with a filtered (Whatman, 0.2 µm) freshly prepared  
507 solution of 1% thiocarbohydrazide (Electron Microscopy Sciences) made by dissolving it at 60°C  
508 for 15 minutes. The cells were again rinsed three times at 5-minute intervals, followed by another  
509 incubation with 2% OsO<sub>4</sub> aqueous solution for 1 hour at RT. The cells were again rinsed three  
510 times at five-minute intervals with ultrapure water, followed by two rinses with 0.05 M maleate  
511 buffer, pH 5.15 (Sigma-Aldrich), and finally incubated with 1% uranyl acetate (Electron  
512 Microscopy Sciences) dissolved in 0.05 M maleate buffer pH 5.15 for 12 hours at 4°C.

513

514 A resin mixture containing methylhexahydrophthalic anhydride (J&K Scientific) and cycloaliphatic  
515 epoxide (ERL 4221, Electron Microscopy Sciences) at a weight ratio of 1.27:1, mixed with the  
516 catalyzing agent (Hishicolin PX-4ET, Nippon Chemical Industrial) at a 1:100 ratio by volume, was  
517 prepared in a water bath sonicator at RT for 15 minutes.

518

519 During the same period, the glass coverslips with the attached CF samples were placed face up  
520 on wet ice and then rinsed twice for five minutes with ultrapure water, followed by dehydration  
521 using a graded series of ethanol solutions (30, 50, 70, 90%) each step lasting three minutes, then  
522 three washes in 100% absolute ethanol for 10 minutes ending with three washes with anhydrous  
523 acetone (Sigma-Aldrich) for 10 minutes at RT.

524

525 The glass cover slips with the attached, dehydrated CF samples immersed in anhydrous acetone  
526 were placed in a wide-mouth glass jar, mixed with the resin at a 1:1 volumetric ratio, and gently  
527 rocked on a plate rocker for 12 hours at room temperature. The resin mixture was then removed  
528 by aspiration and replaced with 10 ml of freshly prepared resin mixture and further incubated with  
529 gentle rocking for another two hours; this step was repeated thrice, each time with freshly

530 prepared resin. Finally, the glass cover slips with the attached cells were placed on top of cut off  
531 caps from 1.5 mL Eppendorf tubes containing freshly prepared resin was oriented with the cells  
532 towards the cap, and the resin allowed to polymerize for 12 hours at 100°C. Upon resin hardening,  
533 the caps were immersed in boiling water for 5 minutes and then quickly transferred into liquid  
534 nitrogen leading to separation of the glass cover slip from the resin and retention of the cells in  
535 the polymerized resin.

536

### 537 **High pressure freezing, freeze-substitution and embedding**

538 Cells were plated on 6 x 0.1 mm sapphire disks in MEM (Corning™ 10009CV) supplemented with  
539 10% Fetal Bovine Serum (Atlanta Biologicals S11150). Two sapphire discs (Technotrade  
540 international 616-100), one or both containing attached cells facing inwards, were separated by  
541 a 100 µm stainless steel spacer (Technotrade international 1257-100) and processed for high  
542 pressure freezing on a Leica EM ICE high pressure freezer (Leica microsystems). Following high  
543 pressure freezing, the sapphire discs were placed under liquid nitrogen and transferred into the  
544 top of cryotubes placed in liquid nitrogen and containing frozen 2% OsO<sub>4</sub>, 0.1% uranyl acetate  
545 and 3% water in acetone; freeze substitution (FS) was carried using an EM AFS2 automatic freeze  
546 substitution device (Leica Microsystems) according to a pre-programmed FS schedule (-140°C to  
547 -90°C for 2h, -90°C to -90°C for 24h, -90°C to 0°C for 12h and 0°C to 22°C for 1h). Samples were  
548 then removed from the AFS2 device, rinsed 3 times in anhydrous acetone, 3 times in propylene  
549 oxide (Electron Microscopy Sciences), 3 times in 50% resin (24g Embed 812, 9g DDSA, 15g  
550 NMA, 1.2g BDMA; Electron Microscopy Sciences 14121) dissolved in propylene oxide, and finally  
551 transferred into embedding molds (EMS 70900) containing 100% resin; the resin was then  
552 allowed to polymerize for 48 hours at 65°C. The sapphire disc was then separated from the resin  
553 block by sequential immersion in liquid nitrogen and boiling water.

554

### 555 **FIB-SEM imaging**

556 The polymerized resin blocks were cut from the molds and glued, with the free face facing away,  
557 onto the top of aluminum pin mount stubs (Ted Pella), using conductive silver epoxy adhesive  
558 (EPO-TEK H20S, Electron Microscopy Sciences). The free face was then coated with carbon (20  
559 nm thickness) generated from a high purity carbon cord source (Electron Microscopy Sciences)  
560 using a Quorum Q150R ES sputter coater (Quorum Technologies) and the resin block loaded on  
561 the microscope specimen stage of a Zeiss Crossbeam 540 microscope for FIB-SEM imaging.  
562 After eucentric correction, the stage was tilted to 54° with a working distance of 5 mm for  
563 coincidence of ion and electron beams. A cell of interest was located on the free face of the resin

564 block by SEM, after which a thin layer of platinum was deposited using the gas injection system.  
565 A coarse trench was then milled adjacent to the cell using the 30 kV/30 nA gallium ion beam. This  
566 block face was polished with a 30 kV/7 nA gallium beam before starting the interlaced sequence  
567 of FIB milling with a 30 kV/3 nA gallium beam and SEM imaging with a 1.5 kV/400 pA electron  
568 beam advanced in 5 nm steps. The X/Y pixel size was 5 nm to create isotropic voxels. For  
569 samples prepared by HPFS, we added registration marks on top of the platinum layer generated  
570 with a 1.5 kV/50 pA gallium beam, followed by contrast enhancement of the marks by irradiation  
571 with a 1.5 kV/5 nA electron beam and final deposition of second platinum layer. FIB-SEM images  
572 were collected using the Inlens detector with a pixel dwell time of 10-15 us. The FIB-SEM images  
573 were aligned post-acquisition with the Fiji plugin Register Virtual Stack Slices, using the  
574 translation (Feature extraction model and Registration model) and shrinkage constraint options  
575 (Schroeder et al., 2021).

576  
577 FIB-SEM data at 10 nm were acquired using a backscatter electron detector (EsB) with a grid  
578 voltage set to 808 V to filter out scattered secondary electrons, with a dwell time of 3  $\mu$ s, line  
579 averaging of 8, and pixel size of 10 x 10 nm (X/Y). FIB milling was performed with the 30 kV/30  
580 nA gallium ion beam in 10 nm steps to create isotropic 10 x 10 x 10 nm (XYZ) voxels. The  
581 sequential FIB-SEM images were registered using the Fiji plugin *StackReg* with Rigid Body  
582 transformation.

583

#### 584 **Ground truth annotation**

585 All our ground truth annotations were binary masks located at least 47 voxels away from the  
586 boundaries of the 3D FIB-SEM image. This ensured that training of the neural network was done  
587 with sufficient semantic context within the image resulting in improved model predictions.

588

589 Ground truth annotations for mitochondria, Golgi apparatus and endoplasmic reticulum were  
590 generated by using the carving module of Ilastik (Berg et al., 2019) or our graph cuts-based semi-  
591 automated annotation tool, and when needed, by further manual editing using VAST (Berger et  
592 al., 2018) to remove voxels that did not belong to the structure of interest or to add voxels for  
593 regions that had not been included in the original binary mask.

594

595 Ground truth annotations for the relatively complex three-dimensional substructure of the Golgi  
596 apparatus included membrane boundaries and the lumen for the characteristic 3-6 closely  
597 stacked fully enclosed membrane lamellae, the fenestrated and somewhat swollen trans-Golgi

598 network stack, and the variable number of small vesicles clustered next to the Golgi  
599 apparatus. They were created with our semi-automated graph-cut annotation tool.

600

601 Ground truth annotations for endocytic clathrin coated pits and for caveolae were manually  
602 generated in consecutive planes using VAST, by drawing along the contours following the plasma  
603 membrane invaginations characteristic of these structures.

604

605 Ground truth annotations for nuclear pores were manually generated plane by plane using VAST,  
606 by drawing along the contours of the nuclear outer and inner membrane adjacent to the nuclear  
607 pore.

608

### 609 **Graph-cut annotation tool**

610 We developed a new tool to aid an expert annotator in marking *sparse* and *coarse* labels one  
611 plane at a time in a sub-volume to generate the segmentation required to generate ground truth  
612 annotations for a chosen organelle and separate it from the background (see Figure S2).

613

614 This tool was written in Python and adopted to suit the annotation needs associated with 3D FIB-  
615 SEM data. It is publicly available at [https://github.com/kirchhausenlab/gc\\_segment](https://github.com/kirchhausenlab/gc_segment), accompanied  
616 by detailed usage instructions and best practices. A graph-cut segmentation strategy was  
617 subsequently adopted to generate segmentations from these annotations. In effect, the annotator  
618 generated sparse and coarse annotations for organelles and the background (sparse over z-  
619 planes, coarse in terms of adhering to organelle boundaries) inside sub-volumes extracted  
620 manually from the 3D volume. Even though the annotations were coarse, the annotator took care  
621 not to mis-label any voxel. The maxflow algorithm (Boykov et al., 2001) was then employed to  
622 segment organelles based on these annotations.

623

624 The objective energy function for our problem was formulated based on early work on graph-cut  
625 segmentation in computer vision (Boykov and Kolmogorov, 2004). As the sub-volumes are  
626 characteristically large, they were first divided into supervoxels using the SLIC algorithm (Achanta  
627 et al., 2012). In simple terms, supervoxels were formed by grouping adjacent voxels together  
628 based on a similarity criterion, which for our problem setting was chosen as agreement in  
629 grayscale values.

630

631 To describe our energy function, we introduce the following notation. The subscripts  $u$  and  $v$   
632 denote supervoxels; the subscripts  $p$  and  $q$  denote voxels. Let  $G = (G_1, G_2, \dots, G_p, \dots, G_N)$  be the  
633 annotation vector for a sub-volume consisting of  $N$  voxels and let  $A = (A_1, A_2, \dots, A_u, \dots, A_V)$  be the  
634 vector corresponding to the unknown labelling of the  $V$  supervoxels in the volume. The labelling  
635 represents the distinction between organelle and background and is thus binary. For  $G_p \in \{0,1\}$   
636 and  $A_u \in \{0,1\}$ , the labels 0 and 1 represent background and organelle, respectively. The vector  
637  $A$  represents the *deduced labelling* (or *segmentation*) for each supervoxel. We define an objective  
638 energy function over  $A$ ; the vector  $A$  that results in the *least* energy is the deduced labelling. The  
639 energy function is

640

$$641 \quad E(A) = R(A) + \lambda B(A) ,$$

642 where

$$643 \quad R(A) = \sum_u \beta D_u(A_u) + \gamma P_u(A_u) , \text{ and}$$

644

$$645 \quad B(A) = \sum_{u,v \in L} B_{u,v} \delta(A_u, A_v)$$

646

647 Here,  $\delta(A_u, A_v)$  is set equal to 1 if  $A_u \neq A_v$  and 0 otherwise.  $L$  signifies the set of voxels adjacent  
648 to each other and hence deemed *neighbors*. Adjacency means that two supervoxels share a  
649 boundary with each other.  $\beta$ ,  $\gamma$ , and  $\lambda$  are weights given to the individual terms.

650  $P_u$  and  $D_u$  represent *unary* terms of the energy function, as they depend only on one supervoxel,  
651 while  $B_{\{u,v\}}$  represents *pair-wise* terms. The terms  $P_p$ , and  $D_p$ , can similarly be defined for voxels,  
652 and then used to define the aggregated terms  $P_u$ ,  $D_u$ , and  $B_{\{u,v\}}$ .

653

654 The unary terms are defined by two factors, (a) the grayscale values of voxels and their agreement  
655 with the annotated foreground and background voxels, as in earlier work (Boykov and  
656 Kolmogorov, 2004; Boykov et al., 2001), and (b) the distance of the voxels from the nearest  
657 annotation of foreground and background. The pair-wise terms are also defined according to  
658 earlier work, based on the distance between two supervoxels, defined as the distance between  
659 the arithmetic center of two supervoxels.

660

661 The variables  $A_u$  represent a segmentation of the organelle in the 3D sub-volume. The objective  
662 of the semi-automatic segmentation is to find the vector  $A$  that minimizes the energy function

663  $E(A)$ . As the defined energy function is sub-modular, it can be optimized using graph cuts  
664 (Kolmogorov and Zabini, 2004). An efficient algorithm to optimize such functions, called *maxflow*  
665 (Boykov and Kolmogorov, 2004), was used to find the optimum vector  $A$ .

666

667 There are hyper-parameters in our formulation, namely  $\beta$ ,  $\gamma$ , and  $\lambda$ . These were empirically  
668 defined as  $\beta = 1$ ,  $\gamma = 1$ , and  $\lambda = 10$ .

669

## 670 **Data preprocessing for deep learning**

671 Cell image stacks underwent the following steps before they were ready for training:

672 1. Conversion from TIFF format to the block-wise storage format ZARR.

673 The size of a FIB-SEM dataset corresponding to a stack of registered TIFF files  
674 (approximately 2000 planes) was about 20GB. These TIFF stacks were converted into a  
675 ZARR 3-D compressed array (Alistair et al., 2021) to increase the efficiency for  
676 further pre-processing steps and, most importantly, for the neural network training.

677 2. Cropping of the dataset to exclude empty regions outside the cell and to speed up all  
678 further preprocessing steps.

679 3. Block-wise adjustment of brightness and contrast with 3D contrast-limited adaptive  
680 histogram equalization (CLAHE, (Zuiderveld, 1994)) using `scikit-`  
681 `image.exposure.equalize_adapthist` with kernel size 128 and clip limit 0.02 (see  
682 figure S3).

683 4. Application of morphological operations to automatically clean up ground truth annotations  
684 based on biological assumptions, implemented with the python libraries `scikit-`  
685 `image.morphology` (Walt et al., 2014) and `scipy.ndimage` (Virtanen et al., 2020). For  
686 mitochondria and Golgi apparatus, small objects were removed (less than 27 voxels); for  
687 endoplasmic reticulum, holes were removed (less than 20,000 voxels, corresponding to  
688  $0.0025 \mu\text{m}^3$ ); no clean-up was required for nuclear pores or clathrin coated pits.

689 5. Automatic creation of a coarse voxel-wise mask to mark voxels outside of the cell, using  
690 a combination of operations from the python libraries `scikit-image.morphology` and  
691 `scipy.ndimage`. The parameters and combination of operations were adapted visually to  
692 each dataset. Operations included intensity thresholding, binary opening and closing,  
693 filling small holes, and removing small objects.

694 6. Optional: Correction for systematic biases in annotations. We observed that our semi-  
695 automatic annotations carry biases that can be corrected automatically. For mitochondria  
696 and Golgi apparatus, most of the annotations did not include the membrane, which we



697 wanted to consider as part of the organelle. Note that this correction depended on the  
698 characteristics of a specific dataset (e.g., contrast of membranes): mitochondria  
699 annotations were dilated by one voxel (5 nm), Golgi apparatus annotations were dilated  
700 by three voxels (15 nm); ER, nuclear pores and clathrin coated pits annotations were not  
701 dilated.

702 7. Defining a metric exclusion zone. Although step (6) allowed us to add most of the  
703 organelles' membrane to the annotation, the ground truth was often not voxel accurate at  
704 the organelle boundaries. A neural network model trained with such data cannot produce  
705 voxel-accurate predictions at the organelle boundaries, leading to misleading evaluation  
706 scores (e. g., F1, see Fig. S10). Following previous works (Haberl et al., 2020; Lucchi et  
707 al., 2012), we avoided this issue by defining an exclusion zone around our semi-automatic  
708 imprecise annotations, created by dilating and eroding the annotations and taking the  
709 logical difference between the two outcomes. The size of both dilation and erosion  
710 depends on the specific structure, as follows — four voxels for mitochondria, two voxels  
711 for Golgi apparatuses, one voxel each for endoplasmic reticulum, and three voxels dilation  
712 plus one voxel erosion for clathrin coated pits and nuclear pores.

713  
714 All operations required only local context, meaning that they could be applied block-wise, and the  
715 computation could be parallelized to multiple CPU cores. To avoid artefacts at the block boundary,  
716 we provided sufficient spatial context to each block with the python library DAISY  
717 [<https://github.com/funkelab/daisy>], which was used for multi-process computation on all cores of  
718 a CPU. These computations were performed on Intel Xeon workstation processors with 20-40  
719 physical cores. Detailed instructions on the use of the preprocessing pipeline are provided at  
720 [https://github.com/kirchhausenlab/incasem#Prepare-your-own-ground-truth-annotations-for-fine-](https://github.com/kirchhausenlab/incasem#Prepare-your-own-ground-truth-annotations-for-fine-tuning-or-training)  
721 [tuning-or-training.](https://github.com/kirchhausenlab/incasem#Prepare-your-own-ground-truth-annotations-for-fine-tuning-or-training)

722

## 723 **Deep learning**

### 724 *Model architecture*

725 A 3D U-Net (Çiçek et al., 2016) based on the architecture used in Funke et al. (2018) was defined,  
726 with three downsampling layers with a factor of two, and two convolutional layers on each  
727 downsampling level. Refer to Figure S3 for details. In total, the network had ~6 million parameters.  
728 It was implemented in PyTorch (Paszke et al., 2019)

729

730 *Training: Overview of pipeline*

731 The pipeline to feed blocks to the neural network was based on (Buhmann et al., 2021) and  
732 implemented using GUNPOWDER [<https://github.com/funkey/gunpowder>], a library that  
733 facilitates machine learning on large multi-dimensional arrays.

734

735 We trained one model per organelle; that is, for model training data, *foreground* refers to voxels  
736 corresponding to only one type of organelle. For each iteration during the training phase, a block  
737 of 204 x 204 x 204 voxels was randomly sampled from the electron microscopy dataset, together  
738 with the corresponding block of ground truth. The blocks were augmented by voxel-wise  
739 transformations, e.g., random intensity shifts, and geometric transformations, e.g., random  
740 rotations and deformations. The blocks were processed through the network, which returned as  
741 an output block a 3D probability map of 110 x 110 x 110 voxels, centered with respect to the  
742 larger input block. The input blocks contained an additional 47 voxels per side to provide the  
743 context required by our convolutional neural network architecture. The output probability map was  
744 compared with the ground truth using cross-entropy loss, which was minimized by iteratively  
745 updating the model parameters by stochastic gradient descent.

746

747 *Training: Data sampling*

748 Our dataset annotations were highly imbalanced. Because our structures of interest were small,  
749 only a few voxels formed the so-called foreground (FG), with a large portion of the dataset  
750 consisting of arbitrary background (BG=1-FG) (e.g., cytosol, nucleus, other organelles).

751 Imbalanced datasets are known to be problematic for convergence of neural network training,  
752 and we confirmed this empirically while working with our datasets. As a rule of thumb, it is  
753 desirable to sample blocks having a foreground to background ratio roughly equivalent to the  
754 global ratio of the two. To make use of all available training data, while keeping the number of  
755 unbalanced training blocks as low as possible, we implemented the following scheme (using  
756 operations available in GUNPOWDER):

- 757 1. Reject blocks that contain more than 25% out-of-sample voxels.
- 758 2. Calculate the FG/BG ratio for each incoming block.
- 759 3. Reject a block with probability 0.9 if fewer than 5% of the voxels in it (ratio in step (2)) are  
760 labeled as foreground.

761

762 *Training: Data augmentation*

763 It was impractical to process and store tens of thousands of augmented FIB-SEM blocks, required  
764 to train the 3D neural network model. Instead, during each training cycle, we augmented the  
765 number of ground truth annotations by randomly applying the transformations listed in Table S8  
766 to the training block.

767

768 *Training: Pipeline details*

769 After data augmentation, we shifted the scale of the data in the input block (204 x 204 x 204  
770 voxels), such that the input intensities were in [-1, 1]. Each block accepted by the neural network  
771 was then propagated through the network leading to outputs of spatial dimensions 110 x 110 x  
772 110 voxels, centered with respect to the larger input block. The neural network assigned  
773 complementary FG and BG probability to each voxel. The probability map was then compared to  
774 the ground truth annotations with the binary cross-entropy loss. We balanced the loss contribution  
775 of foreground and background voxels inversely proportional to their occurrence, clipped at a value  
776 of 1:100. The training loss was backpropagated, and the network parameters were updated using  
777 the Adam optimizer (Kingma et al., 2014) with 0.00003 learning rate and 0.00003 weight decay.  
778 The network parameters were saved at the end of every 1000 training iterations.

779

780 *Training: Computational requirements*

781 Eight CPU cores were used in parallel for data fetching and augmentation, while a single GPU  
782 (Nvidia A100 on a DGX-A100 system) was used for training. Typically, a training iteration lasted  
783 1-1.3 sec, and 100,000 iterations (28 h, including periodic validation tests) were sufficient to train  
784 our 3D neural network model.

785

786 *Validation: Procedure*

787 To avoid overfitting, we assessed the model's performances during the training phase on both  
788 training dataset and validation dataset, where the latter dataset was not used to update the model  
789 parameters. Every 1,000 iterations we saved the training model, froze its weights, and calculated  
790 the loss on a small set of ground truth blocks. These were hold-out blocks from the cells that  
791 contained the training data, or blocks originating from naïve cells not represented in the training  
792 data. By comparing training and validation losses (see plot in Figure S5) we usually identified  
793 three different regimes: under-fit, fit and over-fit. When the model under-fitted, both training and  
794 validation loss decreased with the training iteration. In the fit regime (Figure S5, in grey), typically

795 from more than 20,000 training iterations, the validation loss was approximately constant, while  
796 the training loss slightly reduced. In the over-fit regime, the training loss continued to drop, but  
797 the validation loss started to rise. We considered the model saved at the training iteration in the  
798 middle of the fit regime to be the one that could best generalize better, i.e., make optimal  
799 predictions on previously un-seen data. This is a standard procedure in Machine Learning, known  
800 as "early stopping".

801

#### 802 *Validation: Performance metrics*

803 The performance of the models obtained by the 3D U-net neural networks was determined by  
804 comparing the predicted binary segmentation with respect to ground-truth using the following  
805 three metrics: (1) precision (percentage of voxels predicted as subcellular structure that is the  
806 substructure), (2) recall (percentage of substructure voxels correctly predicted as substructure)  
807 and (3) F1 index score (harmonic mean of precision and recall, see Figure S10). These metrics  
808 were also used by other state-of-the-art supervised learning methods, such as COSEM, allowing  
809 for a quantitative comparison.

810

811 Using the true positives TP, false positives FP and false negatives FN, we define precision, recall  
812 and F1 as:

$$813 \text{ precision} = \frac{TP}{TP+FP} \quad \text{recall} = \frac{TP}{TP+FN} \quad F1 = 2 \frac{\text{precision} \times \text{recall}}{\text{precision} + \text{recall}} = \frac{TP}{TP+(FP+FN)/2}$$

814

#### 815 *Prediction: Data preprocessing*

816 As for training, the segmentation of new FIB-SEM datasets required certain preprocessing steps  
817 (refer to *Data preprocessing for deep learning* for details):

- 818 1. Conversion from TIFF format to block-wise storage format ZARR.
- 819 2. Crop the dataset to exclude empty regions outside the cell.
- 820 3. Create an approximate voxel-wise mask to mark voxels outside of the cell.
- 821 4. Image data normalization with CLAHE (see Figure S3).

822

#### 823 *Prediction: Pipeline*

824 As first step, the trained model at the iteration determined by early stopping (see *Validation:*  
825 *Procedure*, above) was loaded with frozen weights. The dataset to segment was scanned block  
826 by block and fed into the model, without performing data augmentation. Since the architecture of  
827 the 3D U-Net neural network is fully convolutional and since each predicted voxel has access to  
828 sufficient context, we could produce the predictions block-wise independently and in parallel.

829

830 The model performed a forward pass, producing as output a 3D voxel-wise probability map, saved  
831 to disk in ZARR format. A threshold of 0.5 was applied to the predicted probability map to extract  
832 a binary segmentation map (organelle/background). Although our pipeline allowed the user to set  
833 this threshold to an arbitrary value from zero to one, we set it to the default value of 0.5 in every  
834 experiment to avoid introducing any post-processing bias. The segmentation map was later  
835 visualized in neuroglancer [<https://github.com/google/neuroglancer>], superimposed on the  
836 electron microscopy image. Finally, we converted the predicted segmentations back to TIFF  
837 format and reverted the initial dataset cropping to obtain a segmentation that was globally aligned  
838 with the originally acquired image stack from the microscope.

839

840 *Prediction: Computational requirements*

841 A prediction was performed on a single GPU (Nvidia A100 on a DGX-A100 system), backed by  
842 multiple CPU cores, employed to parallelly load and pre-process the data. When using five CPU  
843 cores, our hardware processed 350 blocks (204 x 204 x 204 voxels) in slightly less than five  
844 minutes. Typically, the prediction of one cell image stack, acquired at 5 nm isotropic resolution,  
845 took between 40 minutes and 90 minutes, depending on its volume.

846

847 *Fine-tuning*

848 To fine-tune a trained model on a naïve cell, we performed the following steps:

- 849 1. One block of ground-truth block (minimum 204 x 204 x 204 voxels) within the cell to fine-  
850 tune was annotated.
- 851 2. A model previously trained on the same organelle, whose weights were frozen at the first  
852 train iteration of the fit region, was loaded for continued training.
- 853 3. A training of 15'000 iterations was launched, using as training data only the new prepared  
854 ground-truth block. All fine-tuning training hyperparameters were set identical to the  
855 original training.
- 856 4. The model was saved every 1'000 iterations. The best model iteration was picked based  
857 on the original validation dataset from the fine-tuning target cell.

858

859 Details to perform fine-tuning training using our pipeline are provided at  
860 <https://github.com/kirchhausenlab/incasem#Fine-tuning>.

861

862 **Brief example of fine-tuning**

863 We started by preparing a small ground-truth block of the cell to fine-tune. Because the volume  
864 of the additional ground truth was much smaller than the volume of the ground truth fed to the  
865 pre-trained model (from  $\sim 1/69$  to  $\sim 1/3$ , Table S9), the additional annotation effort was not very  
866 demanding. In the case of CF datasets, for the fine-tuning of mitochondria in Cell 3 BSC-1 and  
867 Cell 6 SUM 159, we loaded the segmentation map performed by the pre-trained model (model  
868 1847) and refined it by manual editing in VAST. Conversely, to fine-tune HPF OpenOrganelle  
869 datasets in the prediction of mitochondria and ER, we picked one additional COSEM ground-truth  
870 crop, previously excluded from the training and validation data. We loaded the pre-trained model  
871 at the first training iteration within the fit regime (i.e., the iteration after which the validation loss  
872 was fairly stable, Fig. S4); for example, in Fig. S4, CF Mitochondria model, we loaded the model  
873 at the training iteration 95,000. We resumed training of the model using only the additional ground  
874 truth block and data augmentation. Typically, after a few thousand training iterations (about  $\sim 1/15$   
875 of the training iterations needed to produce the pre-trained models), the fine-tuned model learned  
876 to segment the fine-tune dataset more precisely, with an increased overall F1 score (Table S9).  
877 We noticed that fine-tuning was beneficial mainly when the initially trained model behaved poorly,  
878 such as in the case of HPFS ER, Cell 21 Jurkat-1, for which F1 increased by 0.21.

879  
880 To understand how fine-tune training helped to improve segmentation, we compared the  
881 segmentation performed by the pre-trained model versus the one produced by the fine-tuned  
882 model (Figure 5-D). In the case of CF, mitochondria, only a few portions of mitochondria were  
883 occasionally missed by the pre-trained model, but they were eventually retrieved by the fine-tuned  
884 models. In HPF ER, fine-tuning reduced the number of false positives, resulting in a neater  
885 segmentation map, suitable for further biological studies.

886  
887 To quantify the impact of fine-tune training, we calculated precision and recall in addition to F1  
888 (Figure S6). Typically, fine-tuning enhanced precision, without affecting recall: the fine-tuned  
889 model learned to classify cell components that looked like the organelle under study, but did not  
890 actually belong to the same semantic class, reducing the number of false positives.

891  
892 As baseline, we compared the fine-tuned model with one having randomly initialized weights and  
893 trained using the same (small) ground truth volume. We found that for most datasets and  
894 organelles (ER Cell 21 Jurkat-1, ER Cell 22 Macrophage-2, mitochondria Cell 21 Jurkat-1,  
895 mitochondria Cell 3 BSC-1, mitochondria Cell 6 SUM 159), the models trained using randomly  
896 initialized weight reached substantially lower F1 scores, even when trained much longer, with up

897 to 200,000 training iterations. Only in one case (mitochondria Macrophage-2), did the model  
898 achieved approximately the same F1 score, but only after training for 160,000 iterations, 20 times  
899 more than the number required by the corresponding fine-tuned model.

900

901 We concluded that fine-tune training is a useful tool to apply whenever the segmentation of a  
902 naïve cell falls short. By taking advantage of pre-trained models and preparing a small ground  
903 truth volume, one can train more accurate models, at a small fraction of the ground truth  
904 annotation and computational costs usually required.

905

## 906 **Analysis of nuclear pores**

### 907 *Automated orientation of nuclear pores on the nuclear envelope*

908 We determined the nuclear pore membrane diameters from top-down FIB-SEM views towards  
909 the nuclear envelope of each of the nuclear pores. This orientation process was automated with  
910 the following steps. First, we generated a 3D binary mask corresponding to the predicted  
911 probability with a threshold of 0.5 for each one of the nuclear pores identified by the 3D U-net  
912 nuclear pore model (Fig. S7A). Second, we determined for each mask its volume, principal axis,  
913 and centroid coordinates. A filtering step was included to eliminate masks with small volume or  
914 short axis due to incompleteness of the predicted mask. Third, we used median filtering of the 3D  
915 point cloud data to remove outliers, thus creating a virtual 'low resolution' 3D surface of the nuclear  
916 envelope by alpha-shape triangulation of the centroids (Akkiraju et al.) (Fig. S7B, top). Fourth, we  
917 obtained a vector normal to each triangle within the triangulation (Fig. S8B, bottom). Finally, we  
918 used the angular information of this vector to reorient the coordinates of the raw image of the  
919 nuclear pore closest to the triangulation to position the nuclear membrane on a view normal to  
920 the observer (Fig. S7C).

921

### 922 *Determination of nuclear pore membrane diameter*

923 The diameter of the membrane pore, defined by the contact between the nuclear membrane and  
924 the pore opening, was determined from the distance separating the two peak signals measured  
925 along a line transecting the middle of the nuclear envelope immediately surrounding the nuclear  
926 pore (d1 and d2 in Fig. S7D). The nuclear pore membrane diameter was expressed as the median  
927 of eighteen radial measurements 10° apart. This calculation increased the precision of the  
928 measurement by taking advantage of the known radial symmetry of the nuclear pore and the  
929 surrounding nuclear envelope on the axis normal to the nuclear envelope; the standard deviation  
930 for each pore diameter measurement (e.g., experimentally determined uncertainty) was 6 nm.

931

## 932 **Analysis of clathrin coated pits and coated vesicles**

933 The model trained on endocytic clathrin coated pits in cell 12 and cell 13 was used to predict  
934 clathrin coated structures in cells 12, 13, 15, and 17. The predictions were gated at a probability  
935 of 0.5 and the corresponding masks then used to locate the clathrin coated structures. These  
936 structures were classified as endocytic clathrin coated pits and coated vesicles if located at the  
937 plasma membrane or within 400 nm, respectively; ‘secretory’ coated pits and coated vesicles  
938 denote the remaining similar structures located in the cell interior. Each prediction was confirmed  
939 by visually inspection of the corresponding image along the three orthogonal directions.

940

941 Measurements of neck, height, and width from the pits (Fig. S8A) and major and minor axis of the  
942 ellipses best fitting the pits and coated vesicles (Fig. S8A,B) were determined by the following  
943 sequential steps: (1) select the view displaying the largest outline by inspection of 9 consecutive  
944 planes along each of the three orthogonal views centered on the centroid of the pit or vesicles;  
945 (2) manually measure the neck height and widths of the pits; (3) establish the outline of the pit or  
946 vesicle in the section chosen in the first step; the darker pixels where the pit or vesicle was present  
947 were selected manually (Fig. S9C, red square in the left panel), segmented into a binary mask  
948 with an Otsu intensity threshold (Otsu, 1979), and skeletonized (Fig. S8C, middle panel); (4)  
949 establish the ellipse best fitting the skeletonized outline of the pit or vesicle (Fig. S8C, right panel);  
950 (5) obtain major and minor axis of the ellipse.

951

## 952 **Statistical analysis**

953 The normality of the nuclear pore size distribution was examined using the Shapiro-Wilk test (Fig.  
954 6C). The comparison of size distributions between nuclear pore diameters from values  
955 determined experimentally and simulated from the median value with an uncertainty of 6 nm using  
956 the nonparametric Kolmogorov-Smirnov test showed they were statistically different ( $p < 0.0001$ ).

957

## 958 **Data availability**

959 The datasets of raw and normalized FIBSEM cells images, ground truth annotations, probability  
960 maps predicted by the models and corresponding segmentation masks are publicly available at  
961 the AWS INCASeM bucket [<https://open.quiltdata.com/b/incasem>].

962

## 963 **Code availability**



964 The software and step-by-step instructions to use it are publicly available at  
965 [https://github.com/kirchhausenlab/gc\\_segment](https://github.com/kirchhausenlab/gc_segment) (Graph-cut annotation tool) and  
966 <https://github.com/kirchhausenlab/incasem> (Deep-learning pipeline).

967

968 Trained neural network models are available at <https://open.quiltdata.com/b/incasem/tree/> with  
969 usage instructions at <https://github.com/kirchhausenlab/incasem>.

## 1119 **Supplemental material**

1120 Supplemental material consists of Figs. S1-S10 and Tables S1-S9.

1121

## 1122 **Acknowledgments**

1123 We thank Jan Funke for initial guidance on the use of deep learning and for maintaining together  
1124 with members of his laboratory the gunpowder and funlib libraries; Jose Inacio Da Costa Filho for  
1125 testing our public available codes; Arlo Sheridan for helpful discussions; Teresa Rodriguez and  
1126 Henrique Girão for providing cells 1 and 2; Giovanni de Nola and Teresa Rodriguez for preparing  
1127 Cells 1-4 for FIB-SEM imaging; Rasmus Herlo and Max Page for preparing Cell 5 for FIB-SEM  
1128 imaging; Justin Houser for preparing Cell 6a-9 for FIB-SEM imaging; Gleb Shtengel and C.  
1129 Shan Xu for preparing Cells 10-13 for FIB-SEM imaging; and S.C. Harrison for extensive editorial  
1130 help; and members of the Kirchhausen laboratory for help and encouragement.

1131

1132 The research was supported a National Institute of General Medical Sciences Maximizing  
1133 Investigators' Research Award GM130386 and a generous grant from SANA to T.K. Acquisition  
1134 of the FIB-SEM microscope was supported by a generous grant from Biogen to T. Kirchhausen.  
1135 Acquisition of the computing hardware including the DGX's GPU-based computers, CPU clusters,  
1136 fast access memory, archival servers and workstations that made possible this study were  
1137 supported by generous grants from the Massachusetts Life Sciences Center to T.K. and an  
1138 equipment supplement to the National Institute of General Medical Sciences Maximizing  
1139 Investigators' Research Award GM130386. Construction of the server room housing the  
1140 computing hardware was made possible with generous support from the PCMM Program at  
1141 Boston Children's Hospital.

1142

1143 The authors declare no competing financial interests.

1144

## 1145 **Author contributions**

1146 B. Gallusser, Mihir Sahasrabudhe and T. Kirchhausen conceptualized the computational aspects  
1147 of the project; B. Gallusser, G. Maltese, G. Di Caprio, and M. Sahasrabudhe created,  
1148 implemented, and used the computational pipeline to train the neural network, obtain models and  
1149 make predictions; J. O'Connor helped set up and maintaining the computing infrastructure; T. J.  
1150 Vadakkan, B. Gallusser, G. Maltese and G. Di Caprio generated and curated the ground truth  
1151 annotations used for training. G. Di Caprio analyzed the data on nuclear pores and coated

1152 structures. Anwasha Sanyal generated the cell lines used to image Cells 13a-17; Anwasha Sanyal  
1153 and Elliott Somerville prepared Cells 13a-17 for FIB-SEM imaging. T. J. Vadakkan used FIB-SEM  
1154 to image most cells used in this study (Cells 1-17); T. Kirchhausen supervised the imaging  
1155 experiments; B. Gallusser, G. Di Caprio, G. Maltese, M. Sahasrabudhe, M. Wiegert, and T.  
1156 Kirchhausen B. participated drafting the manuscript; T. Kirchhausen contributed to the final  
1157 manuscript in consultation with the authors.

## 1158 **References**

- 1159 Achanta, R., Shaji, A., Smith, K., Lucchi, A., Fua, P., and Su&#x0308;sstrunk, S. (2012). SLIC  
1160 Superpixels Compared to State-of-the-Art Superpixel Methods. *Ieee T Pattern Anal* *34*, 2274–  
1161 2282.
- 1162 Akisaka, T., Yoshida, H., Suzuki, R., and Takama, K. (2008). Adhesion structures and their  
1163 cytoskeleton-membrane interactions at podosomes of osteoclasts in culture. *Cell Tissue Res* *331*,  
1164 625–641.
- 1165 Akkiraju, N., Edelsbrunner, H., Facello, M., Fu, F., Mucke, E., and Varella, C. Alpha shapes:  
1166 definition and software. *Proc. Internat. Comput. Geom. Software Workshop*.
- 1167 Berg, S., Kutra, D., Kroeger, T., Straehle, C.N., Kausler, B.X., Haubold, C., Schiegg, M., Ales,  
1168 J., Beier, T., Rudy, M., et al. (2019). ilastik: interactive machine learning for (bio)image analysis.  
1169 *Nature Methods* *16*, 1226–1232.
- 1170 Berger, D.R., Seung, H.S., and Lichtman, J.W. (2018). VAST (Volume Annotation and  
1171 Segmentation Tool): Efficient Manual and Semi-Automatic Labeling of Large 3D Image Stacks.  
1172 *Front Neural Circuit* *12*, 88.
- 1173 Boykov, Y., and Kolmogorov, V. (2004). An Experimental Comparison of Min-Cut/Max-Flow  
1174 Algorithms for Energy Minimization in Vision. *Ieee T Pattern Anal* *26*, 1124–1137.
- 1175 Boykov, Y., Veksler, O., and Zabih, R. (2001). Fast approximate energy minimization via graph  
1176 cuts. *Ieee T Pattern Anal* *23*, 1222–1239.
- 1177 Buhmann, J., Sheridan, A., Malin-Mayor, C., Schlegel, P., Gerhard, S., Kazimiers, T., Krause,  
1178 R., Nguyen, T.M., Heinrich, L., Lee, W.-C.A., et al. (2021). Automatic detection of synaptic  
1179 partners in a whole-brain *Drosophila* electron microscopy data set. *Nat Methods* *18*, 771–774.
- 1180 Çiçek, Ö., Abdulkadir, A., Lienkamp, S.S., Brox, T., and Ronneberger, O. (2016). Medical  
1181 Image Computing and Computer-Assisted Intervention – MICCAI 2016, 19th International  
1182 Conference, Athens, Greece, October 17-21, 2016, Proceedings, Part II. *Lect Notes Comput Sc*  
1183 424–432.
- 1184 Ehrlich, M., Boll, W., Oijen, A. van, Hariharan, R., Chandran, K., Nibert, M.L., and  
1185 Kirchhausen, T. (2004). Endocytosis by random initiation and stabilization of clathrin-coated  
1186 pits. *Cell* *118*, 591–605.
- 1187 Grove, J., Metcalf, D.J., Knight, A.E., Wavre-Shapton, S.T., Sun, T., Protonotarios, E.D.,  
1188 Griffin, L.D., Lippincott-Schwartz, J., and Marsh, M. (2014). Flat clathrin lattices: stable features  
1189 of the plasma membrane. *Molecular Biology of the Cell* *25*, 3581–3594.
- 1190 Haberl, M.G., Churas, C., Tindall, L., Boassa, D., Phan, S., Bushong, E.A., Madany, M., Akay,  
1191 R., Deerinck, T.J., Peltier, S.T., et al. (2018). CDeep3M-Plug-and-Play cloud-based deep  
1192 learning for image segmentation. *Nature Methods* *15*, 677–680.

- 1193 Haberl, M.G., Wong, W., Penticoff, S., Je, J., Madany, M., Borchardt, A., Boassa, D., Peltier,  
1194 S.T., and Ellisman, M.H. (2020). CDeep3M-Preview: Online segmentation using the deep neural  
1195 network model zoo. *BioRxiv* 16, 1233.
- 1196 Heinrich, L., Bennett, D., Ackerman, D., Park, W., Bogovic, J., Eckstein, N., Petruncio, A.,  
1197 Clements, J., Pang, S., Xu, C.S., et al. (2021). Whole-cell organelle segmentation in volume  
1198 electron microscopy. *Nature* 1–6.
- 1199 Heuser, J. (1980). Three-dimensional visualization of coated vesicle formation in fibroblasts. *J*  
1200 *Cell Biol* 84, 560–583.
- 1201 Hoffman, D.P., Shtengel, G., Xu, C.S., Campbell, K.R., Freeman, M., Wang, L., Milkie, D.E.,  
1202 Pasolli, H.A., Iyer, N., Bogovic, J.A., et al. (2020). Correlative three-dimensional super-  
1203 resolution and block-face electron microscopy of whole vitreously frozen cells. *Science* (New  
1204 York, N.Y.) 367, eaaz5357.
- 1205 Kirchhausen, T. (1993). Coated pits and coated vesicles - sorting it all out. *Current Opinion in*  
1206 *Structural Biology* 3, 182–188.
- 1207 Kirchhausen, T. (2000). Clathrin. *Annual Review of Biochemistry* 69, 699–727.
- 1208 Kirchhausen, T. (2009). Imaging endocytic clathrin structures in living cells. *Trends in Cell*  
1209 *Biology* 19, 596–605.
- 1210 Kirchhausen, T., Owen, D., and Harrison, S.C. (2014). Molecular structure, function, and  
1211 dynamics of clathrin-mediated membrane traffic. *Cold Spring Harbor Perspectives in Biology* 6,  
1212 a016725.
- 1213 Kolmogorov, V., and Zabini, R. (2004). What energy functions can be minimized via graph cuts?  
1214 *Ieee T Pattern Anal* 26, 147–159.
- 1215 Liu, J., Li, L., Yang, Y., Hong, B., Chen, X., Xie, Q., and Han, H. (2020). Automatic  
1216 Reconstruction of Mitochondria and Endoplasmic Reticulum in Electron Microscopy Volumes  
1217 by Deep Learning. *Front Neurosci-Switz* 14, 599.
- 1218 Lucchi, A., Smith, K., Achanta, R., Knott, G., and Fua, P. (2012). Supervoxel-Based  
1219 Segmentation of Mitochondria in EM Image Stacks with Learned Shape Features. *Ieee T Med*  
1220 *Imaging* 31, 474–486.
- 1221 Maupin, P., and Pollard, T.D. (1983). Improved preservation and staining of HeLa cell actin  
1222 filaments, clathrin-coated membranes, and other cytoplasmic structures by tannic acid-  
1223 glutaraldehyde-saponin fixation. *The Journal of Cell Biology* 96, 51–62.
- 1224 Mekuč, M.Ž., Bohak, C., Hudoklin, S., Kim, B.H., Romih, R., Kim, M.Y., and Marolt, M.  
1225 (2020). Automatic segmentation of mitochondria and endolysosomes in volumetric electron  
1226 microscopy data. *Comput Biol Med* 119, 103693.

- 1227 Mekuč, M.Ž., Bohak, C., Boneš, E., Hudoklin, S., Romih, R., and Marolt, M. (2022). Automatic  
1228 segmentation and reconstruction of intracellular compartments in volumetric electron  
1229 microscopy data. *Comput Meth Prog Bio* 223, 106959.
- 1230 Müller, A., Schmidt, D., Xu, C.S., Pang, S., D’Costa, J.V., Kretschmar, S., Münster, C., Kurth,  
1231 T., Jug, F., Weigert, M., et al. (2020). 3D FIB-SEM reconstruction of microtubule–organelle  
1232 interaction in whole primary mouse  $\beta$  cells. *J Cell Biology* 220, e202010039.
- 1233 Otsu, N. (1979). A Threshold Selection Method from Gray-Level Histograms. *Ieee Transactions*  
1234 *Syst Man Cybern* 9, 62–66.
- 1235 Paszke, A., Gross, S., Massa, F., Lerer, A., Bradbury, J., Chanan, G., Killeen, T., Lin, Z.,  
1236 Gimelshein, N., Antiga, L., et al. (2019). PyTorch: An Imperative Style, High-Performance Deep  
1237 Learning Library. Arxiv.
- 1238 Pizer, S.M., Amburn, E.P., Austin, J.D., Cromartie, R., Geselowitz, A., Greer, T., Romeny, B. ter  
1239 H., Zimmerman, J.B., and Zuiderveld, K. (1987). Adaptive histogram equalization and its  
1240 variations. *Comput Vis Graph Image Process* 39, 355–368.
- 1241 Plaza, S.M., and Funke, J. (2018). Analyzing Image Segmentation for Connectomics. *Front*  
1242 *Neural Circuit* 12, 102.
- 1243 Saffarian, S., Cocucci, E., and Kirchhausen, T. (2009). Distinct dynamics of endocytic clathrin-  
1244 coated pits and coated plaques. *PLoS Biology* 7, e1000191.
- 1245 Schroeder, A.B., Dobson, E.T.A., Rueden, C.T., Tomancak, P., Jug, F., and Eliceiri, K.W.  
1246 (2021). The ImageJ ecosystem: Open-source software for image visualization, processing, and  
1247 analysis. *Protein Sci* 30, 234–249.
- 1248 Schuller, A.P., Wojtynek, M., Mankus, D., Tatli, M., Kronenberg-Tenga, R., Regmi, S.G., Dip,  
1249 P.V., Lytton-Jean, A.K.R., Brignole, E.J., Dasso, M., et al. (2021). The cellular environment  
1250 shapes the nuclear pore complex architecture. *Nature* 1–5.
- 1251 Shorten, C., and Khoshgoftaar, T.M. (2019). A survey on Image Data Augmentation for Deep  
1252 Learning. *J Big Data* 6, 60.
- 1253 Signoret, N., Hewlett, L., Wavre, S., Pelchen-Matthews, A., Oppermann, M., and Marsh, M.  
1254 (2005). Agonist-induced Endocytosis of CC Chemokine Receptor 5 Is Clathrin Dependent. *Mol*  
1255 *Biol Cell* 16, 902–917.
- 1256 Studer, D., Humbel, B.M., and Chiquet, M. (2008). Electron microscopy of high pressure frozen  
1257 samples: bridging the gap between cellular ultrastructure and atomic resolution. *Histochem Cell*  
1258 *Biol* 130, 877–889.

- 1259 Virtanen, P., Gommers, R., Oliphant, T.E., Haberland, M., Reddy, T., Cournapeau, D., Burovski,  
1260 E., Peterson, P., Weckesser, W., Bright, J., et al. (2020). SciPy 1.0: fundamental algorithms for  
1261 scientific computing in Python. *Nat Methods* 17, 261–272.
- 1262 Walt, S. van der, Schönberger, J.L., Nunez-Iglesias, J., Boulogne, F., Warner, J.D., Yager, N.,  
1263 Gouillart, E., Yu, T., and contributors, scikit-image (2014). scikit-image: image processing in  
1264 Python. *Peerj* 2, e453.
- 1265 Weiss, K., Khoshgoftaar, T.M., and Wang, D. (2016). A survey of transfer learning. *J Big Data*  
1266 3, 9.
- 1267 Willy, N.M., Ferguson, J.P., Akatay, A., Huber, S., Djakbarova, U., Silahli, S., Cakez, C., Hasan,  
1268 F., Chang, H.C., Travasset, A., et al. (2021). De novo endocytic clathrin coats develop curvature  
1269 at early stages of their formation. *Dev Cell* 56, 3146-3159.e5.
- 1270 Xu, C.S., Pang, S., Shtengel, G., Müller, A., Ritter, A.T., Hoffman, H.K., Takemura, S., Lu, Z.,  
1271 Pasolli, H.A., Iyer, N., et al. (2021). An open-access volume electron microscopy atlas of whole  
1272 cells and tissues. *Nature* 599, 147–151.
- 1273 Zeng, T., Murphy, R., Wu, B., and Ji, S. (2017). DeepEM3D: approaching human-level  
1274 performance on 3D anisotropic EM image segmentation. *Bioinformatics (Oxford, England)* 33,  
1275 2555–2562.
- 1276 Zimmerli, C.E., Allegretti, M., Rantos, V., Goetz, S.K., Obarska-Kosinska, A., Zagoriy, I.,  
1277 Halavatyi, A., Hummer, G., Mahamid, J., Kosinski, J., et al. (2021). Nuclear pores dilate and  
1278 constrict in cellulose. *Sci New York N Y* 374, eabd9776.
- 1279 Zuiderveld, K. (1994). *Graphics Gems. VIII Image Process* 474–485.

## 970 **Figure and Video legends**

### 971 **Figure 1. Pipelines used for training and deep-learning neural network prediction**

972 Schematic representation of the deep-learning approach for recognizing subcellular structures in  
973 FIB-SEM volume images using a 3D U-net encoder-decoder neural network.

974 **(A)** For training, three-dimensional stacks containing FIB-SEM data, augmented as described in  
975 Methods, are provided as input images to the 3D U-Net; in this example, the stack includes a  
976 limited number of three-dimensional ground truth annotations for the ER in the form of binary  
977 masks (yellow). The ER predicted by the 3D U-net model is a probability 3D map, whose accuracy  
978 is evaluated as a prediction error by measuring the cross-entropy loss. The model parameters  
979 are iteratively updated during training until convergence of the probability error is achieved.

980 **(B)** For prediction, small three-dimensional stacks with data not used for training covering the  
981 complete FIB-SEM volume image of a naïve cell (or from the remaining regions of the cell used  
982 for training) are provided as input to the 3D U-net model trained in **(A)**. In this example, the  
983 predicted ER is a three-dimensional probability map centered on the three-dimensional stack.  
984 This arrangement standardizes the three-dimensional context for all predicted voxels within the  
985 FIB-SEM image.

986

### 987 **Figure 2. Performance of the deep-learning network to predict in naïve cells**

988 Visual comparisons between predictions (crimson) by 3D U-net models trained using combined  
989 data from two HEK293A cells to recognize **(A)** ER or **(B)** Golgi apparatus and corresponding  
990 ground truth annotations (purple) in the naïve BSC-1 and SUM 159 cells not used for training  
991 (Table S1). The representative images from single plane views from FIB-SEM volume data are  
992 from cells prepared by CF isotropically acquired at 5 nm resolution; red and yellow arrows  
993 highlight small regions containing voxels of false positive and false negative assignments. Scale  
994 bar, 500 nm (See Videos 1 and 2).

995

### 996 **Figure 3. Network predictions of mitochondria, ER and Golgi apparatus**

997 Single plane view from a FIB-SEM volume image from naïve cell 15 (SVG-A) not used for training  
998 prepared by HPFS and visualized during interphase at 5 nm isotropic resolution. The small region  
999 contains representative model predictions for mitochondria (cyan), ER (yellow) and Golgi  
1000 apparatus (magenta) obtained from three 3D U-net models, each trained with organelle-specific  
1001 ground truth annotations, without fine-tuning, from interphase cells 19 (Hela-2) and 20 (Hela-3)  
1002 prepared by HPFS. Scale bar, 2  $\mu$ m.

1003



1004 **Figure 4. Predictive ER model resolves the structural complexity of the ER network during**  
1005 **different stages of the cell cycle**

1006 **(A)** Representative examples of ER predictions in naïve cell 15 (SVG-A) processed during  
1007 interphase as described in Fig. 3 showing the characteristic network of ER sheets connected at  
1008 branch points to ER tubules. ER tubules were more abundant towards the periphery of this cell,  
1009 ER sheets were more abundant closer to the nucleus. For clarity, manual VAST editing was used  
1010 to eliminate pixels due to false positive predictions associated with the nuclear envelope. Scale  
1011 bar, 1  $\mu\text{m}$ .

1012 **(B)** Representative examples of ER predictions from a mitotic naïve cell 8 (SUM 159) prepared  
1013 by CF and imaged isotropically at 10 nm; the ER model was trained with ER ground truth  
1014 annotations from interphase cells 1 and 2 (HEK293A) prepared by CF visualized isotropically at  
1015 5 nm resolution. It shows successful recognition of an extensive network of fenestrated ER sheets  
1016 (red arrow heads) connected to ER tubules, characteristic of mitotic cells. Ground truth  
1017 annotations used to train the interphase ER model did not contain ER fenestrations, as they are  
1018 barely present during stage of the cell cycle. Darker regions corresponding to chromosomes are  
1019 outlined with yellow dotted lines. Scale bar, 3  $\mu\text{m}$  (see Video 3).

1020

1021 **Figure 5. Effects of extensive combination of data sets and fine-tuning during training**

1022 **(A-D)** Examples to highlight the effect on the predictive performance of **(A, C, D)** mitochondria  
1023 and **(A, B)** ER and models trained with data from cells prepared by CF or HPFS, with substantial  
1024 differences in general appearance and contrast. The images show several comparisons between  
1025 ground truth annotations and predictions from models trained as described in the insets with data  
1026 obtained from cells prepared by different sample preparation protocols. Details of the cell and  
1027 training protocols are in Tables S1, S2 and S8. Voxels corresponding to false positive (cyan  
1028 arrows) and false negative (red arrows) predictions are indicated. Scale bar, 500 nm.

1029 **(A)** Predictions from *cross-domain* models, for which the training data and predictions were done  
1030 using cells prepared with different sample preparation protocols, were less accurate than those  
1031 obtained from the *specialized* models, for which training, and predictions were done using cells  
1032 prepared with the same sample preparation protocol. Predictions from the *generalist* models,  
1033 obtained by training using ground truth annotations from cells prepared by CF and HPFS,  
1034 performed as well as the predictions from the specialized models.

1035 **(B-D)** Effect on the predictive performance of the models by fine tuning during training.

1036

1037 **Figure 6. Identification of nuclear pores and variations in their membrane pore diameter**

1038 A nuclear pore model was generated by training without fine tuning used ground truth annotations  
1039 of nuclear pores from cell 13a SVG-A prepared by HPFS and imaged at 5 nm isotropic resolution.  
1040 **(A)** Orthogonal views of a representative nuclear pore not used for training show ground truth  
1041 annotations and model prediction. Scale bar, 50 nm.

1042 **(B)** Nuclear pore predictions for all the pores on the nuclear envelope of naïve cell 19 (Hela-2)  
1043 prepared by HPFS and visualized during interphase at 4 x 4 x 5.3 nm isotropic resolution (left  
1044 panel); the inset highlights the characteristic doughnut shape of the nuclear pore. Scale bar, 2  
1045 um. Representative orthogonal views (right panels) of a nuclear pore and model prediction. Scale  
1046 bar, 50 nm.

1047 **(C)** Histogram of nuclear membrane pore diameters of nuclear pores measured in naïve cells 15,  
1048 17 and 19 (N=934) identified by the nuclear pore model. Each membrane pore diameter  
1049 determined in the raw image represents the average value from 18 measurements spaced 18°  
1050 apart (see inset and Methods). The Gaussian fit (blue) shows the expected size distribution if the  
1051 data had come from membrane pores of a single diameter centered on the experimentally  
1052 determined median (most abundant species); the bar width (6 nm) corresponds to the expected  
1053 error of the measurements (see Methods).

1054 **(D)** Three-dimensional distribution of nuclear pores on the nuclear envelope of cell 19, color coded  
1055 as a function of membrane pore diameter.

1056

### 1057 **Figure 7. Identification of clathrin coated pits, coated vesicles and caveolae.**

1058 A coated pit model was generated by training with ground truth annotations from Cell 12 (Hela-2)  
1059 prepared by HPFS and imaged at ~ 5 nm isotropic resolution.

1060 **(A)** Orthogonal views of a representative endocytic clathrin coated pit (CCP) not used for training  
1061 showing ground truth annotations and model prediction. Scale bar, 50 nm.

1062 **(B)** Orthogonal views of a caveola, an endocytic clathrin coated pit (CCP) and a clathrin coated  
1063 vesicle (CCV) at the plasma membrane, and a coated pit (CCP) and vesicle (CCV) associated  
1064 with membranes from the secretory pathway. Each panel shows the ground truth annotation and  
1065 the model prediction. An example of a COPI vesicle not predicted by the coated pit model is also  
1066 shown. Views are from naïve cell 17 SVGA prepared by HPFS and imaged with ~ 5 nm isotropic  
1067 resolution.

1068 **(C)** Violin plots of width and height for caveolae (CAV) and endocytic clathrin coated pits (CCP)  
1069 in the raw images of the structures identified by the coated pit model in cell 17 (see also Figure  
1070 S8, and Clathrin coated pits and vesicles, Methods).

1071 (D) Violin plots of major and minor axis and eccentricity of the fitted ellipse of all pits and vesicles  
1072 in the raw images of the structures identified by the coated pit model in cell 17 (see also Figure  
1073 S8, and Clathrin coated pits and vesicles, Methods).

1074 (E) The left-hand panel shows the distribution of height versus neck width for endocytic clathrin  
1075 coated pits in cell 17, identified by the coated pit model. The plot shows two clusters, which  
1076 correspond to early and late coated pits, respectively, as illustrated by the schematics (see also  
1077 Figure S8, and "Clathrin coated pits and vesicles" in Methods). The right-hand panel shows  
1078 histograms for height and major axis of the fitted ellipse for late endocytic coated pits and coated  
1079 vesicles, respectively.

1080

### 1081 **Video 1. Ground truth annotations for mitochondria, ER and Golgi apparatus**

1082 Passing through a FIB-SEM volume with contrast equalized using CLAHE. Image is from Cell 1  
1083 HEK293A prepared by CF and imaged at ~ 5 nm isotropic resolution. The video shows ground  
1084 truth annotations for mitochondria (cyan), ER (red) and Golgi apparatus (green). The annotations  
1085 were generated for all mitochondria and Golgi apparatus within the FIB-SEM volume, and all ER  
1086 within the highlighted 8  $\mu\text{m}$  x 3  $\mu\text{m}$  x 3  $\mu\text{m}$  block (orange box).

1087

### 1088 **Video 2. Predictions of mitochondria**

1089 Passing through the FIB-SEM volume with contrast was equalized using CLAHE. Image is from  
1090 naïve Cell 1 HEK293A (not used for training). The video shows predictions by the mitochondria  
1091 model trained with ground truth annotations for mitochondria from Cell 2 HEK293A. Both cells  
1092 were prepared by CF and imaged at ~ 5 nm isotropic resolution. The model identified all  
1093 mitochondria; comparison of the ground truth annotations and predictions shows correct voxel  
1094 assignments (true positives, yellow), missing assignments (false negatives, cyan), incorrect  
1095 assignments (false positives, magenta). The small fraction of false positive assignments predicted  
1096 by the model are associated with unidentified tubular and spherical structures of small size.

1097

### 1098 **Video 3. Prediction of mitotic ER**

1099 Passing through the FIB-SEM volume with contrast equalized. Image is from naïve prometaphase  
1100 Cell 8 SUM 159 imaged at ~ 10 nm isotropic resolution. The video shows ER predictions (yellow)  
1101 generated with ground truth annotations from interphase Cell 1 HEK293A and Cell 2 HEK293A  
1102 imaged at ~ 5 nm isotropic resolution. All cells were prepared by CF. Visual inspection confirmed  
1103 that the model correctly predicted all the ER, including the fenestrations characteristic of the

1104 mitotic ER sheets; fenestrations were not included in the ground truths used for training, as they  
1105 are mostly absent in the ER of interphase cells (Chou et al., 2021).

1106

1107 **Video 4. Prediction of mitochondria, ER, Golgi apparatus, nuclear pores, and clathrin**  
1108 **coated pits and vesicles**

1109 Passing through the raw FIB-SEM volume from naïve Cell 15 SVG-A prepared by HPFS and  
1110 imaged at ~ 5 nm isotropic resolution. The video shows predictions as surface renderings for  
1111 mitochondria (cyan), ER (yellow), Golgi apparatus (magenta) in a block of 3  $\mu\text{m}$  x 3  $\mu\text{m}$  x 3  $\mu\text{m}$   
1112 (block size: 664 x 586 x 572 voxels). A small number of false positive pixels generated by the  
1113 Golgi model and located within a 323 x 271 x 230 voxel block were removed using VAST. One  
1114 identified Golgi apparatus is highlighted (light pink) . Predictions for all nuclear pores (yellow) and  
1115 clathrin coated pits and vesicles within the imaged volume are also shown. Visual inspection  
1116 confirmed that the models trained with ground truth annotations from Cell 19 HeLa and Cell 20  
1117 HeLa prepared by HPFS and imaged at ~ 5 nm isotropic resolution correctly predicted all the  
1118 subcellular structures.

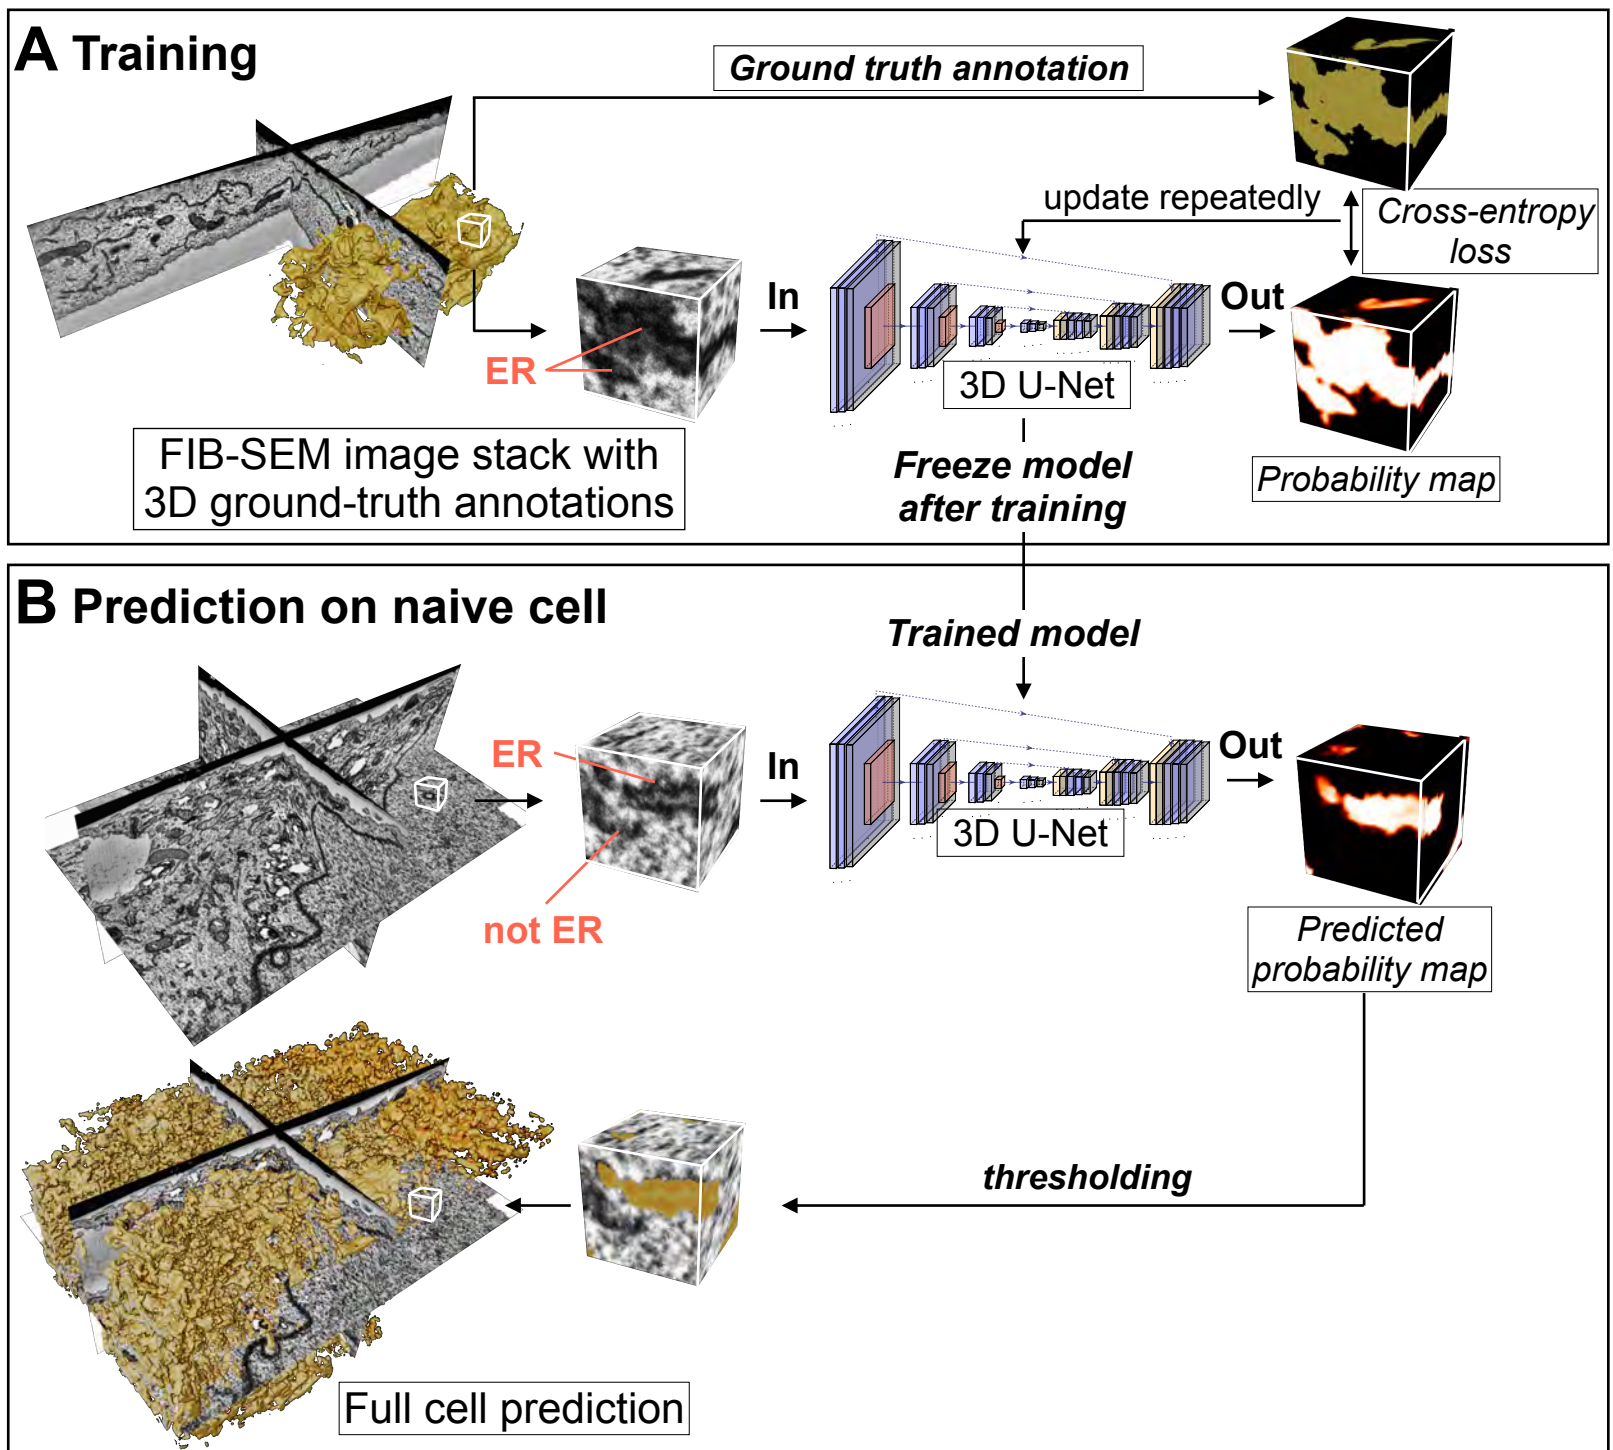

Figure 1

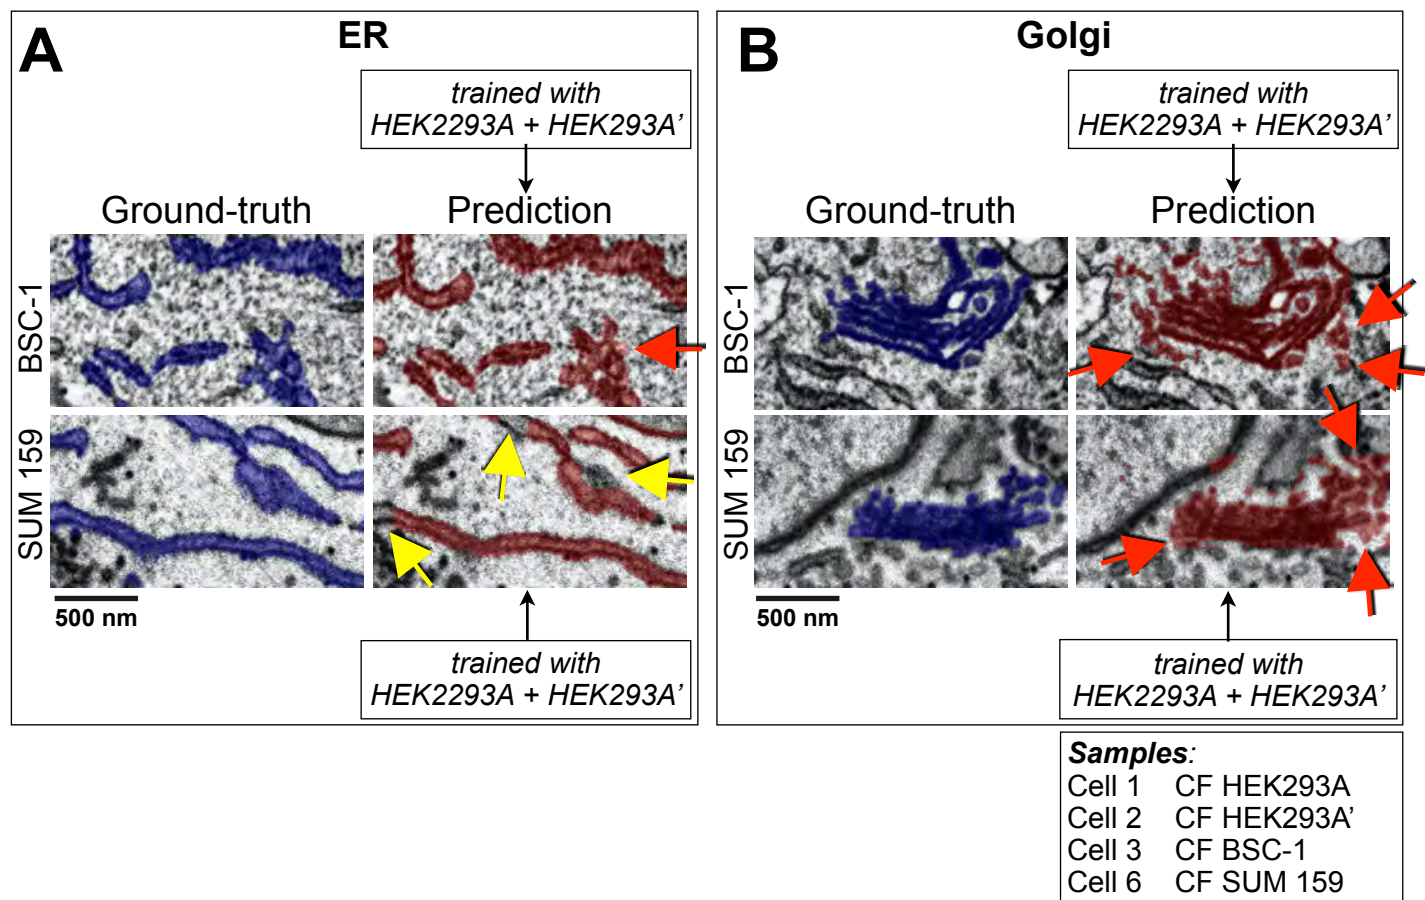

**Figure 2**

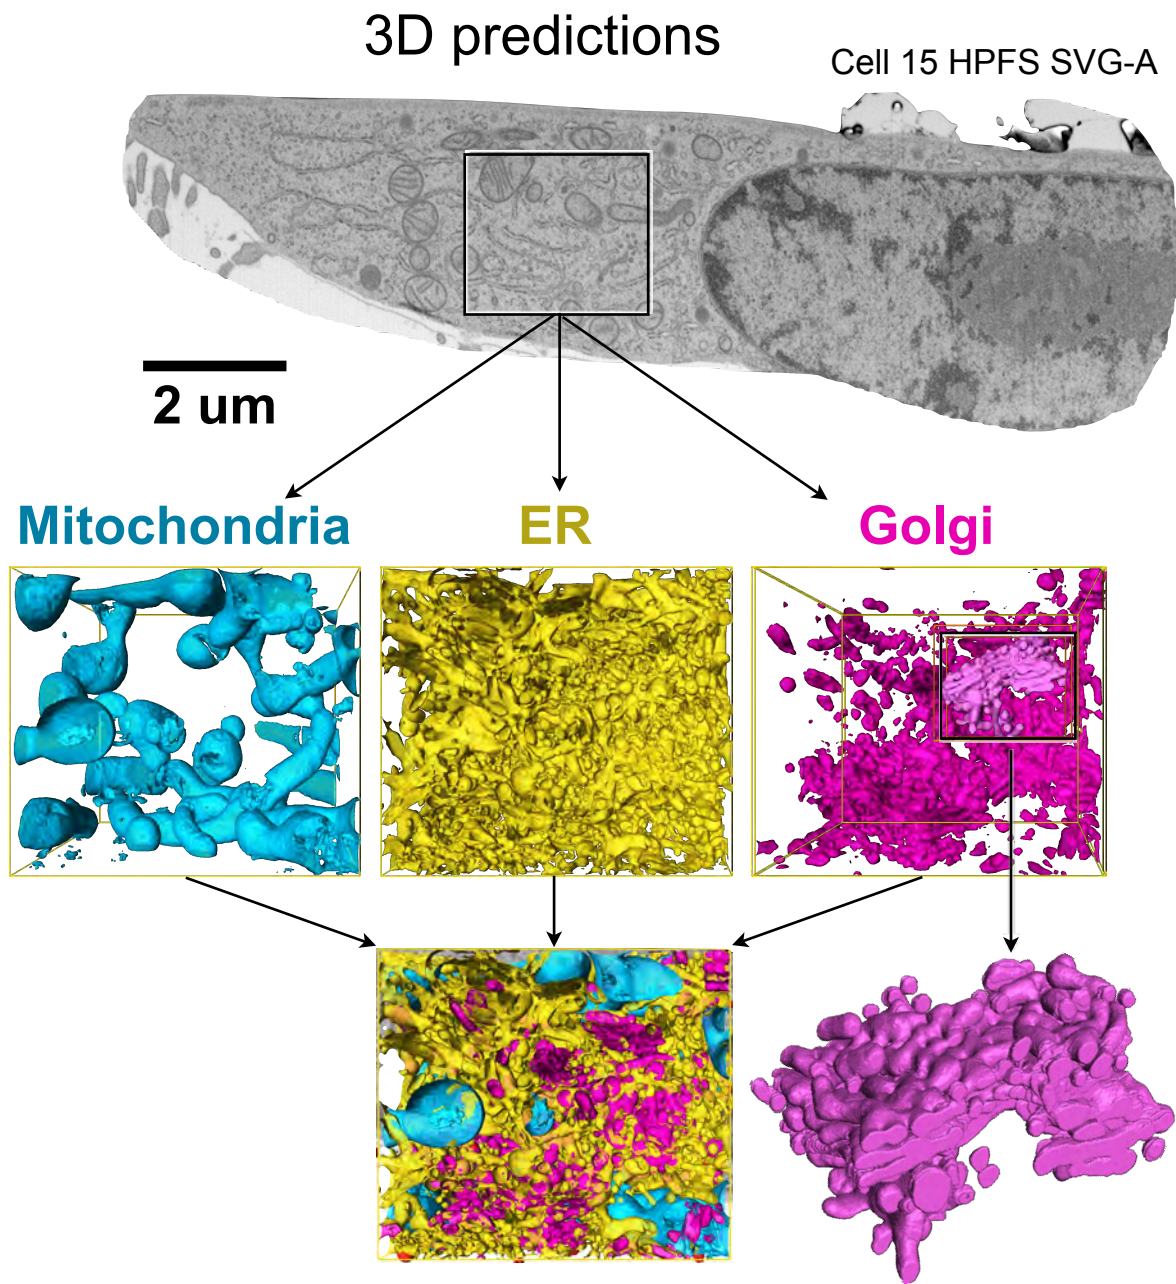

Figure 3

**A**

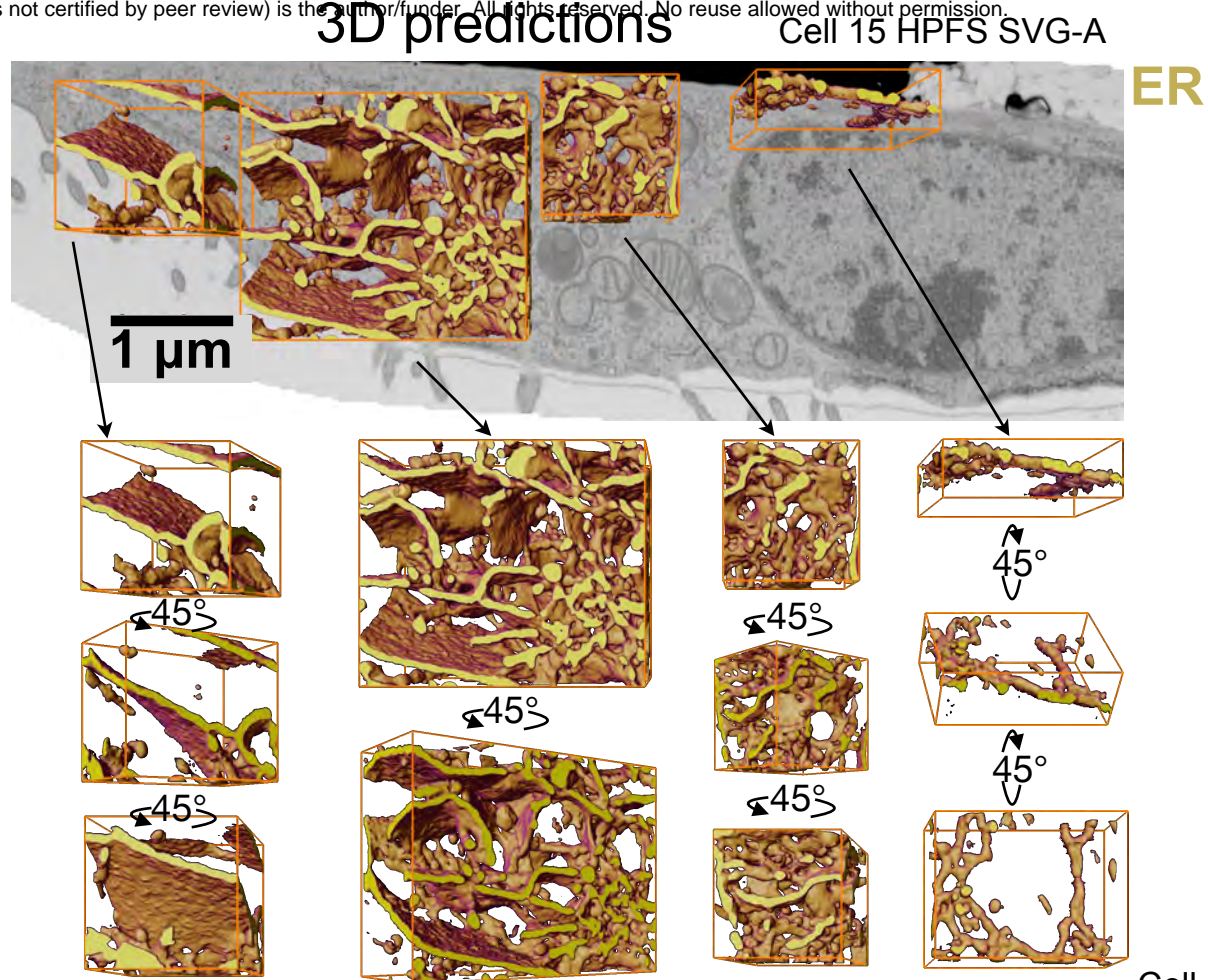

**B**

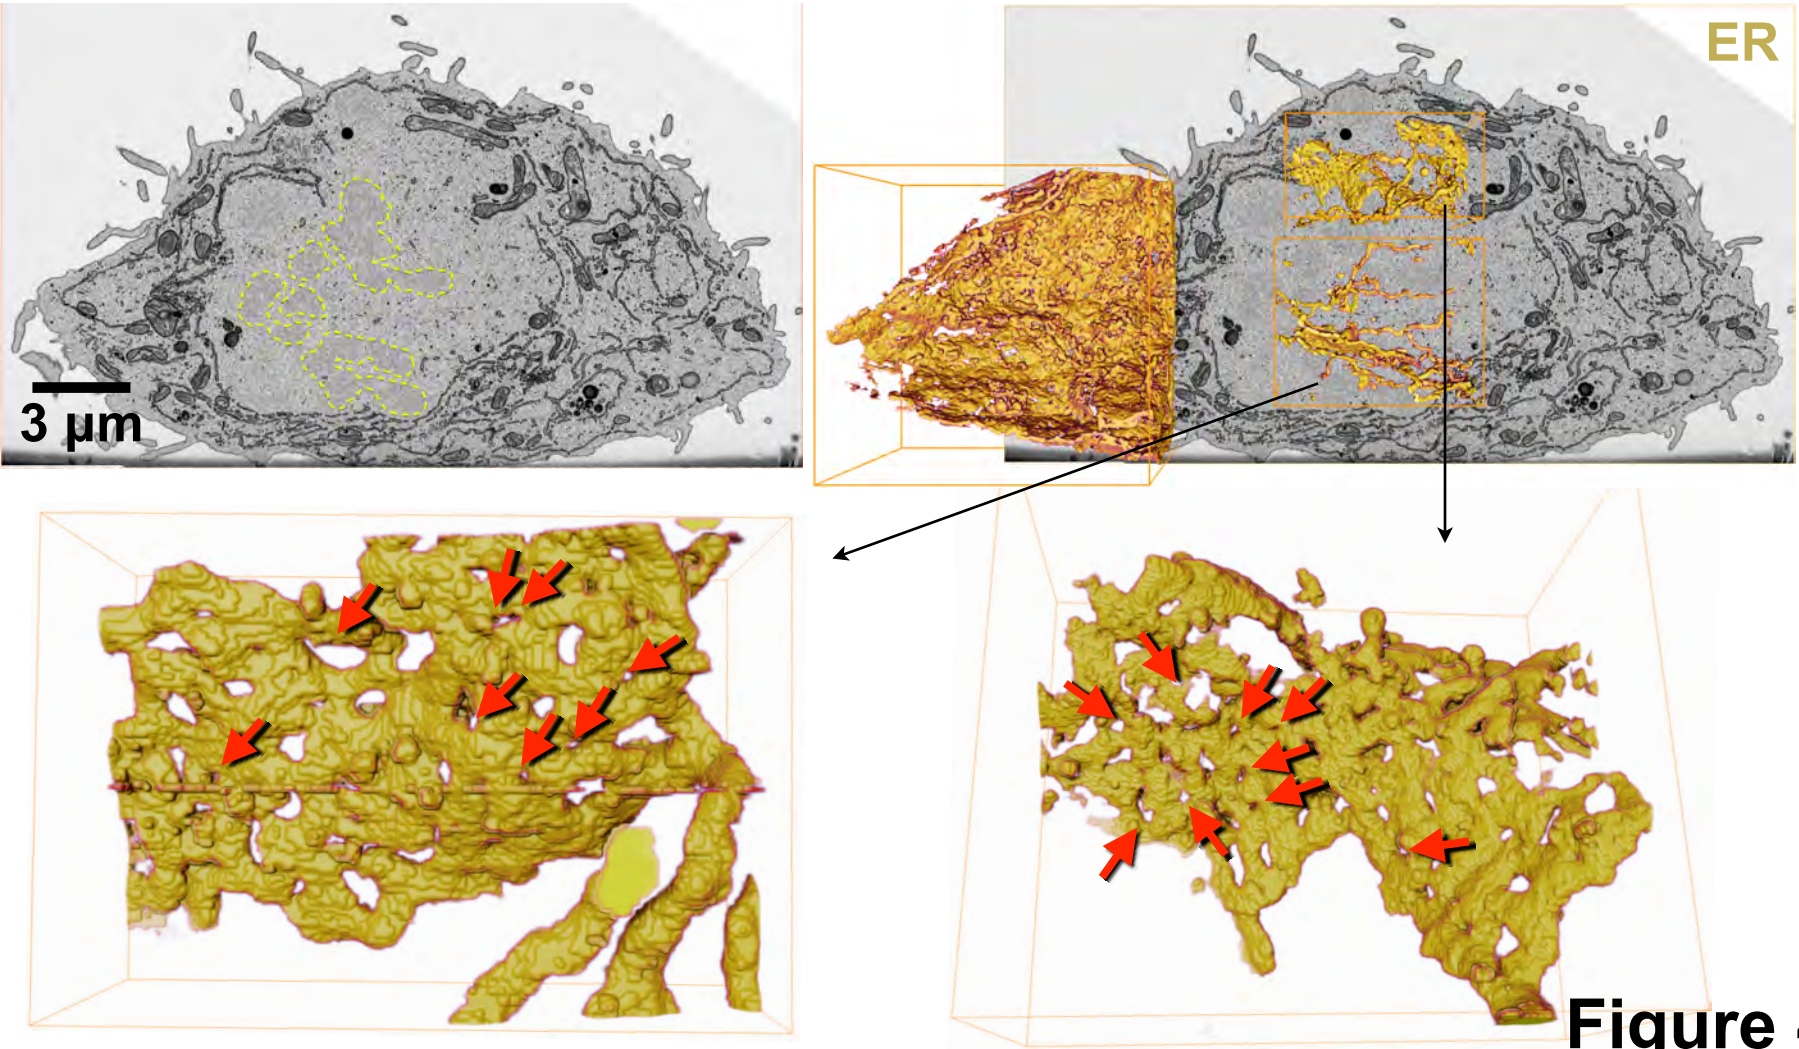

**Figure 4**



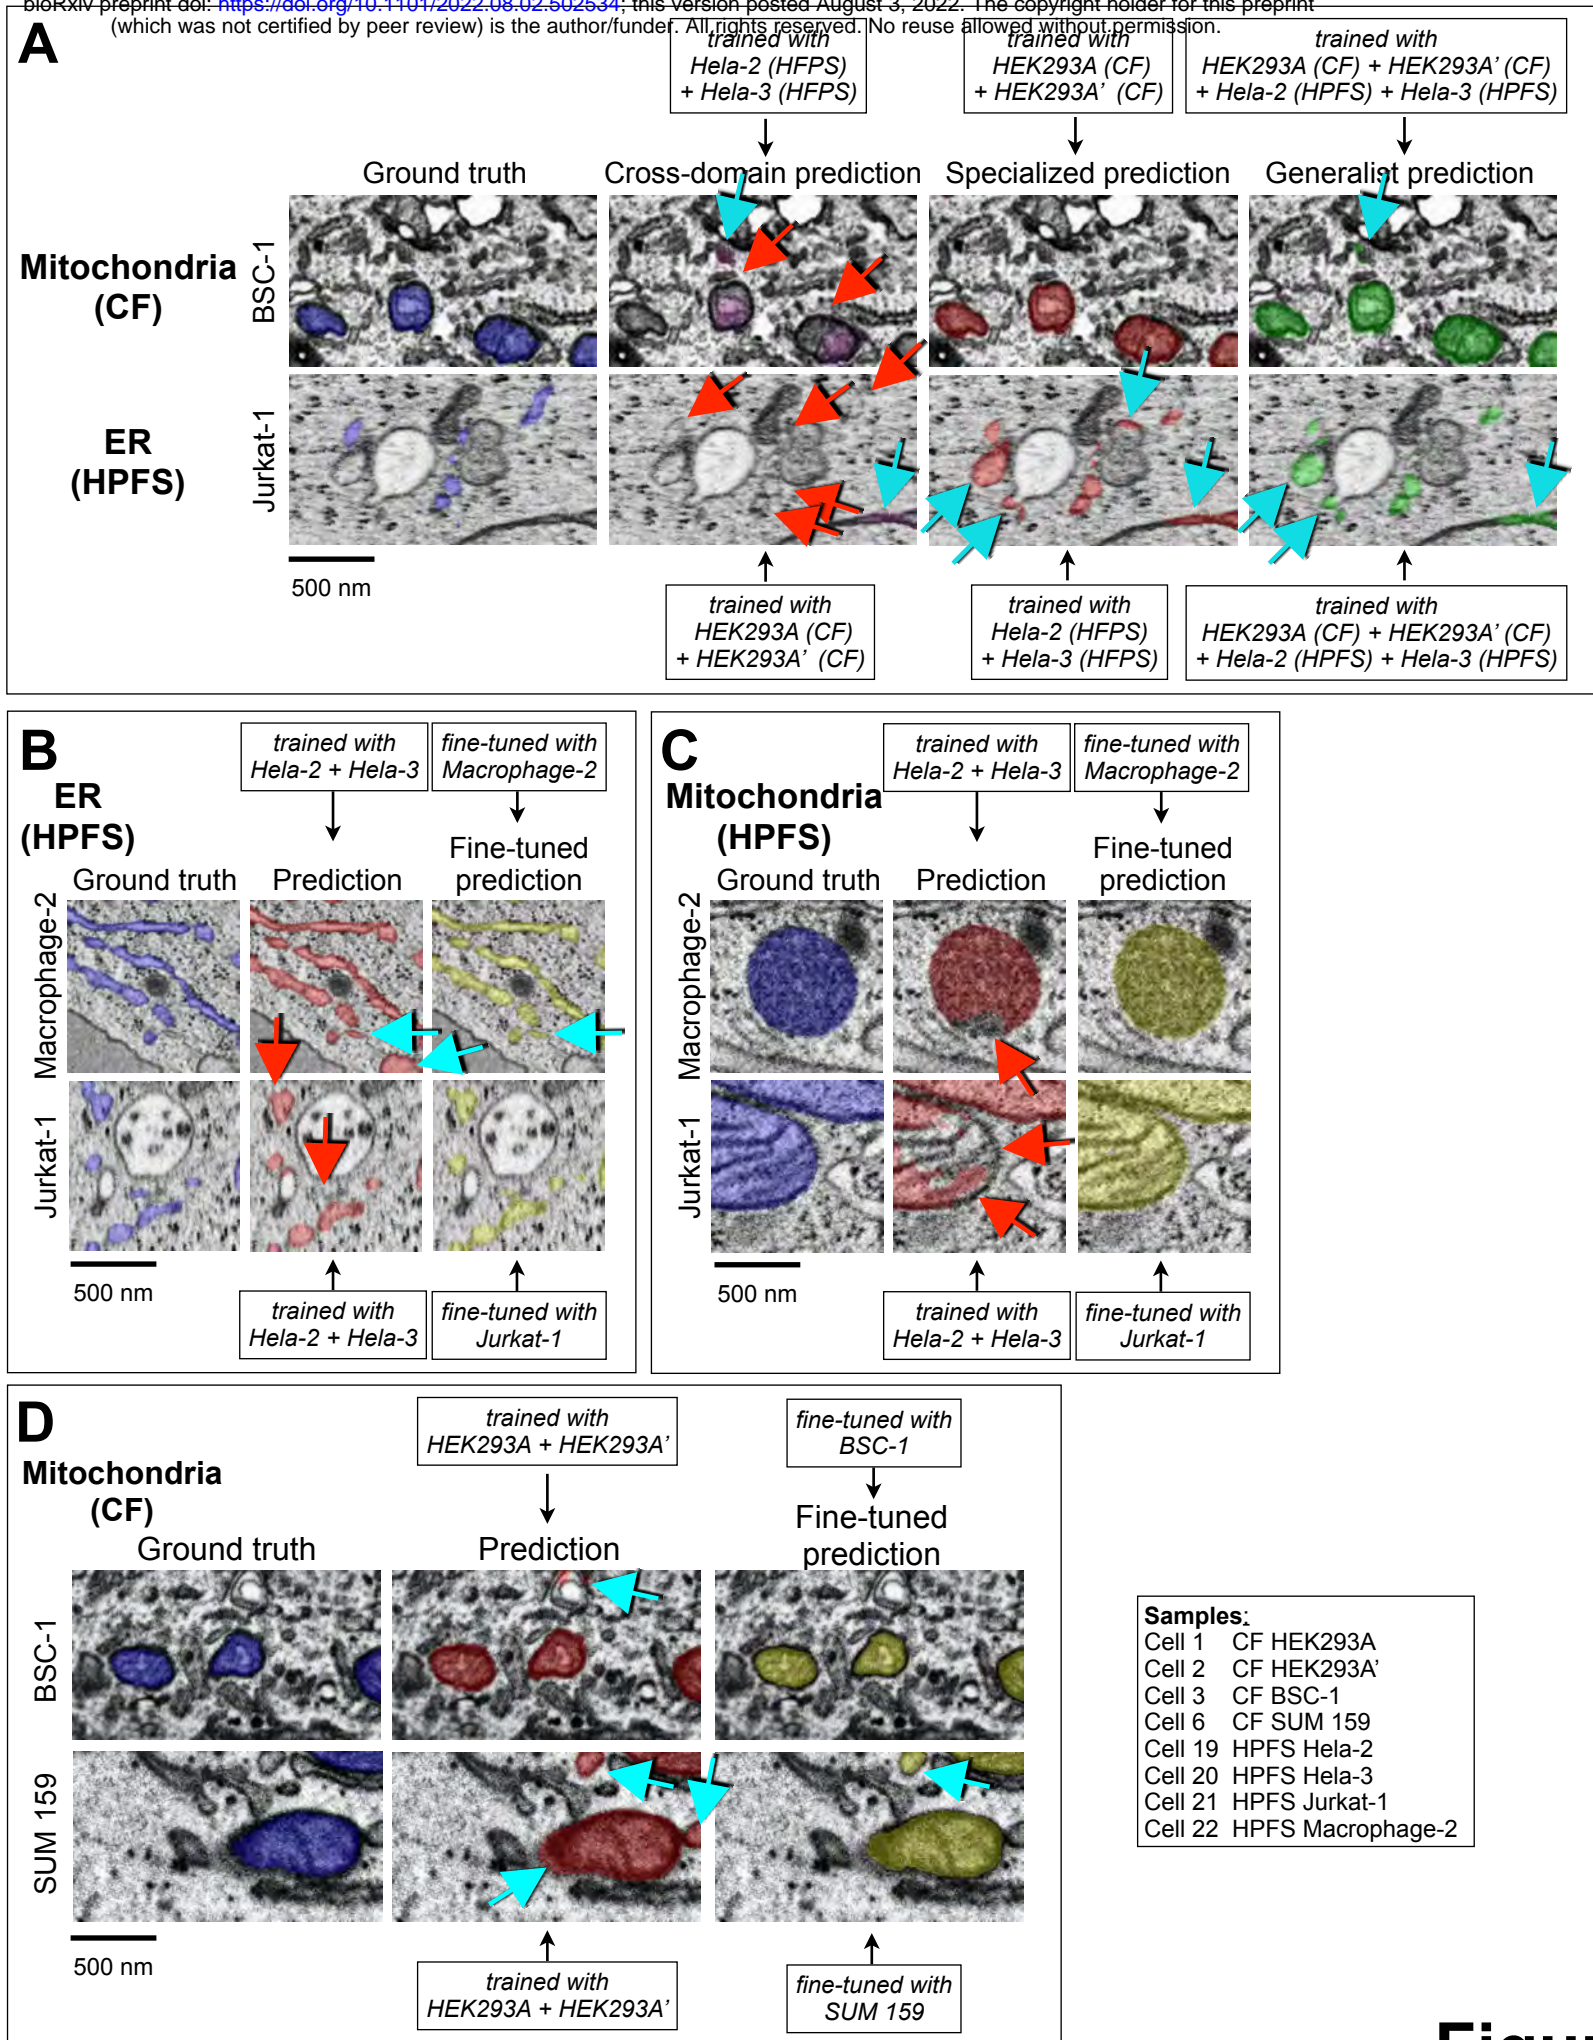

**Figure 5**

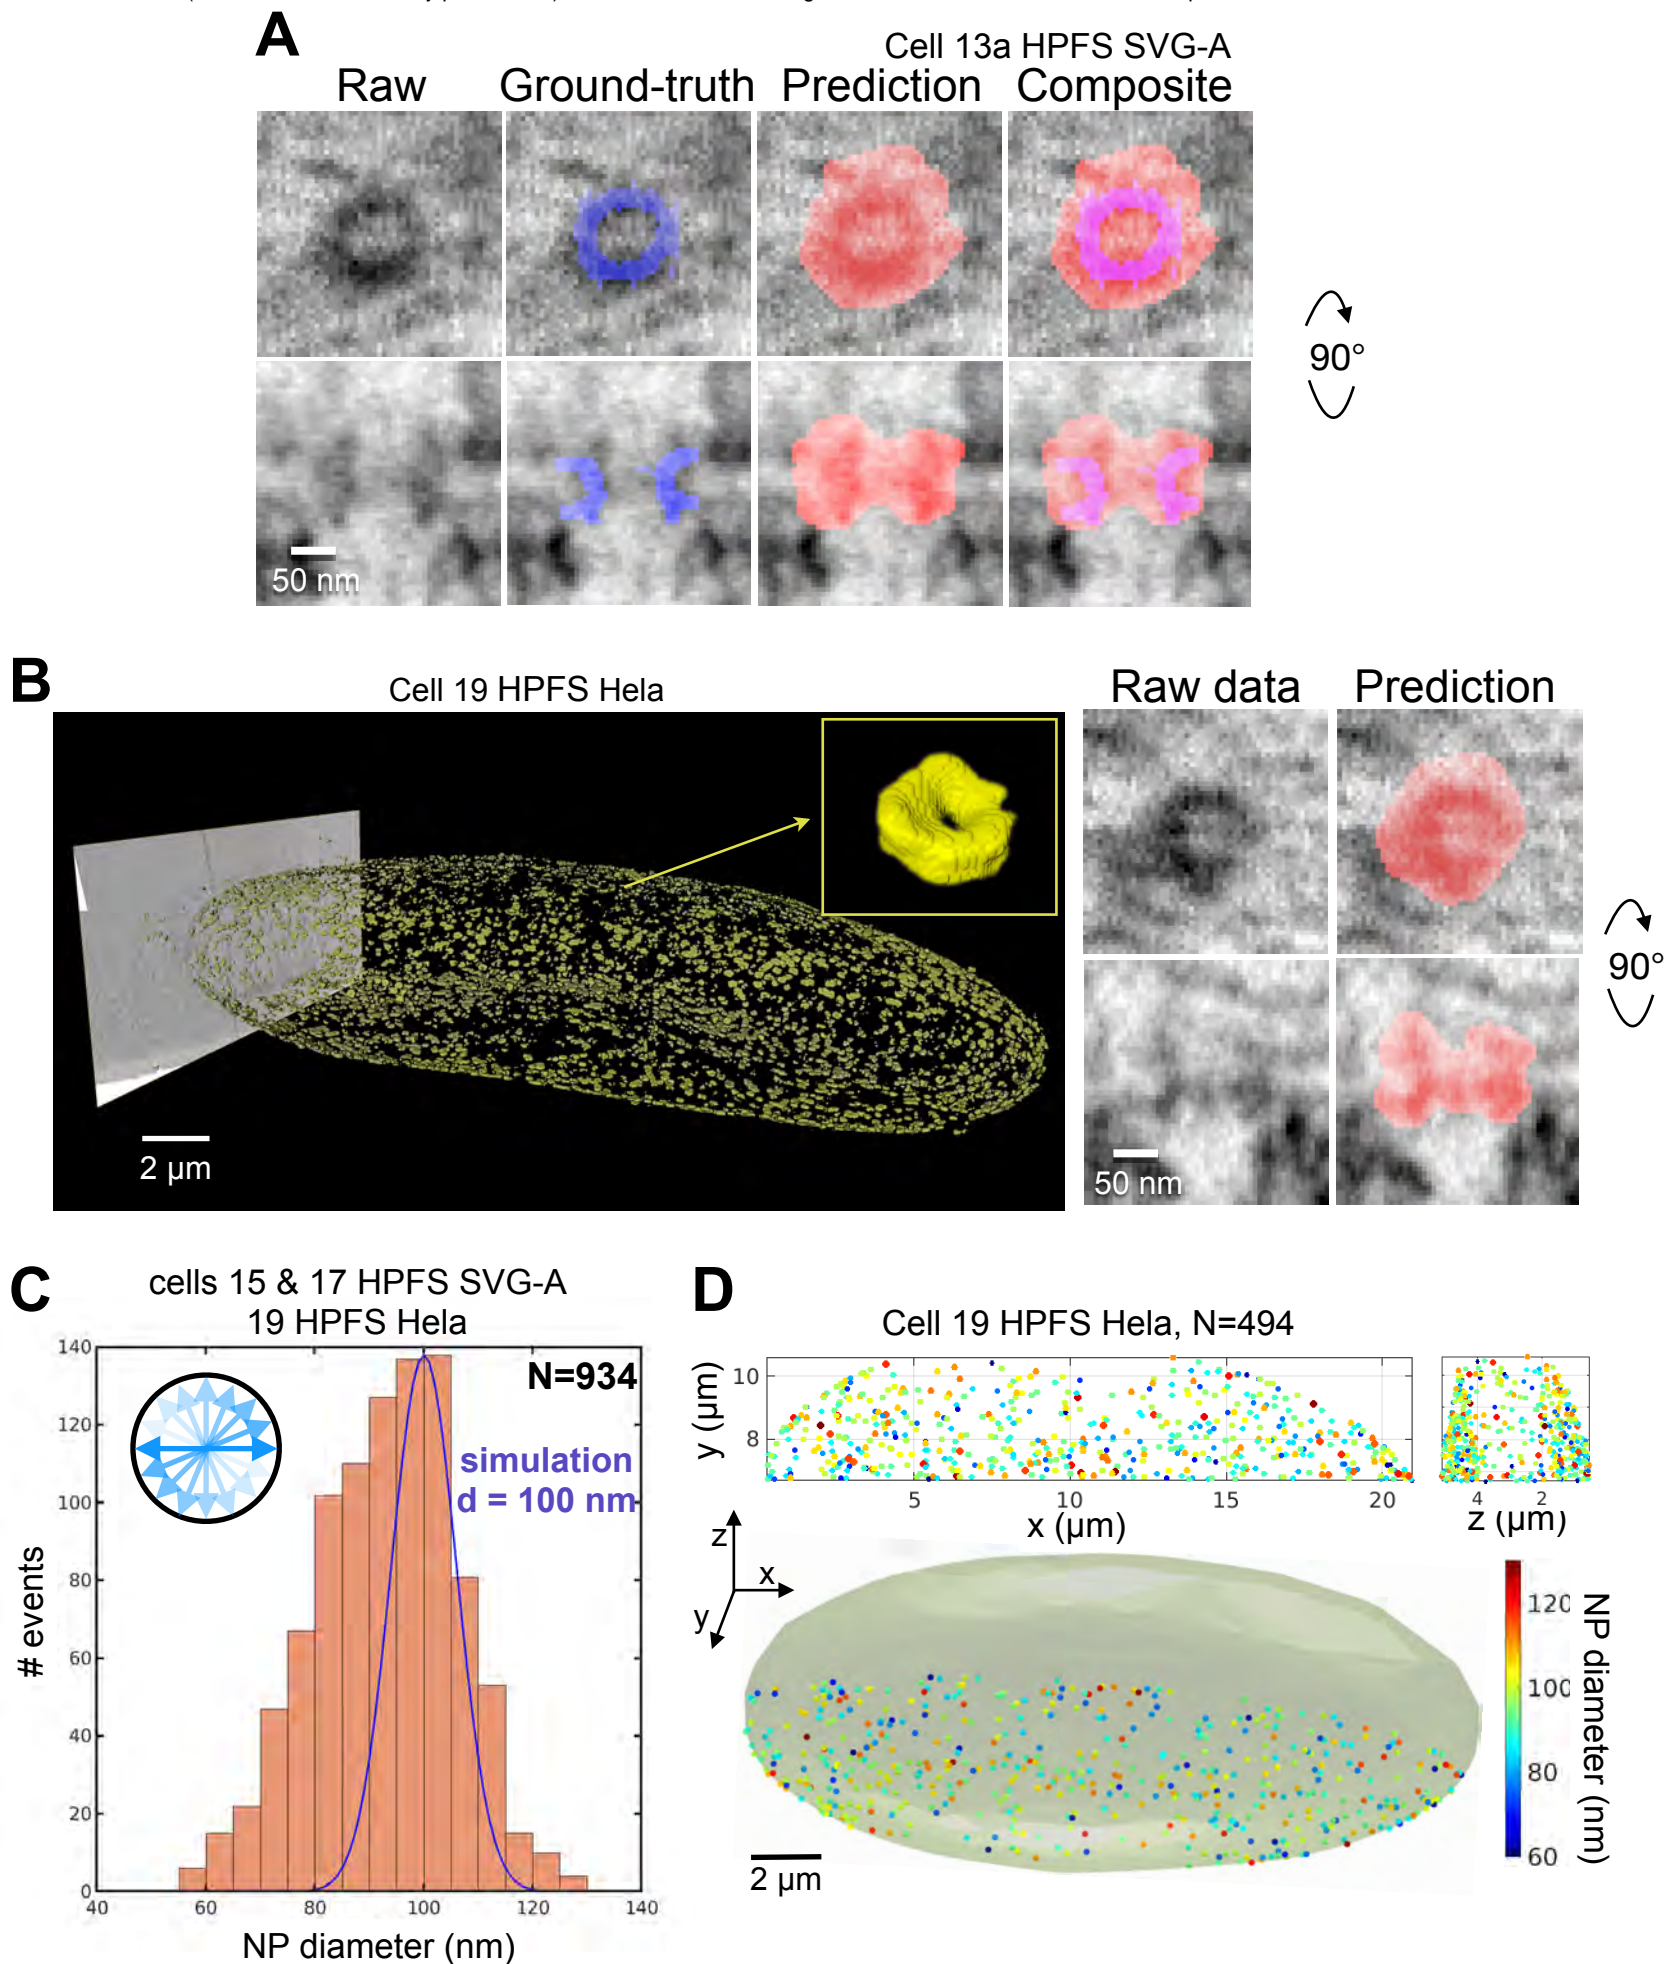

**Figure 6**

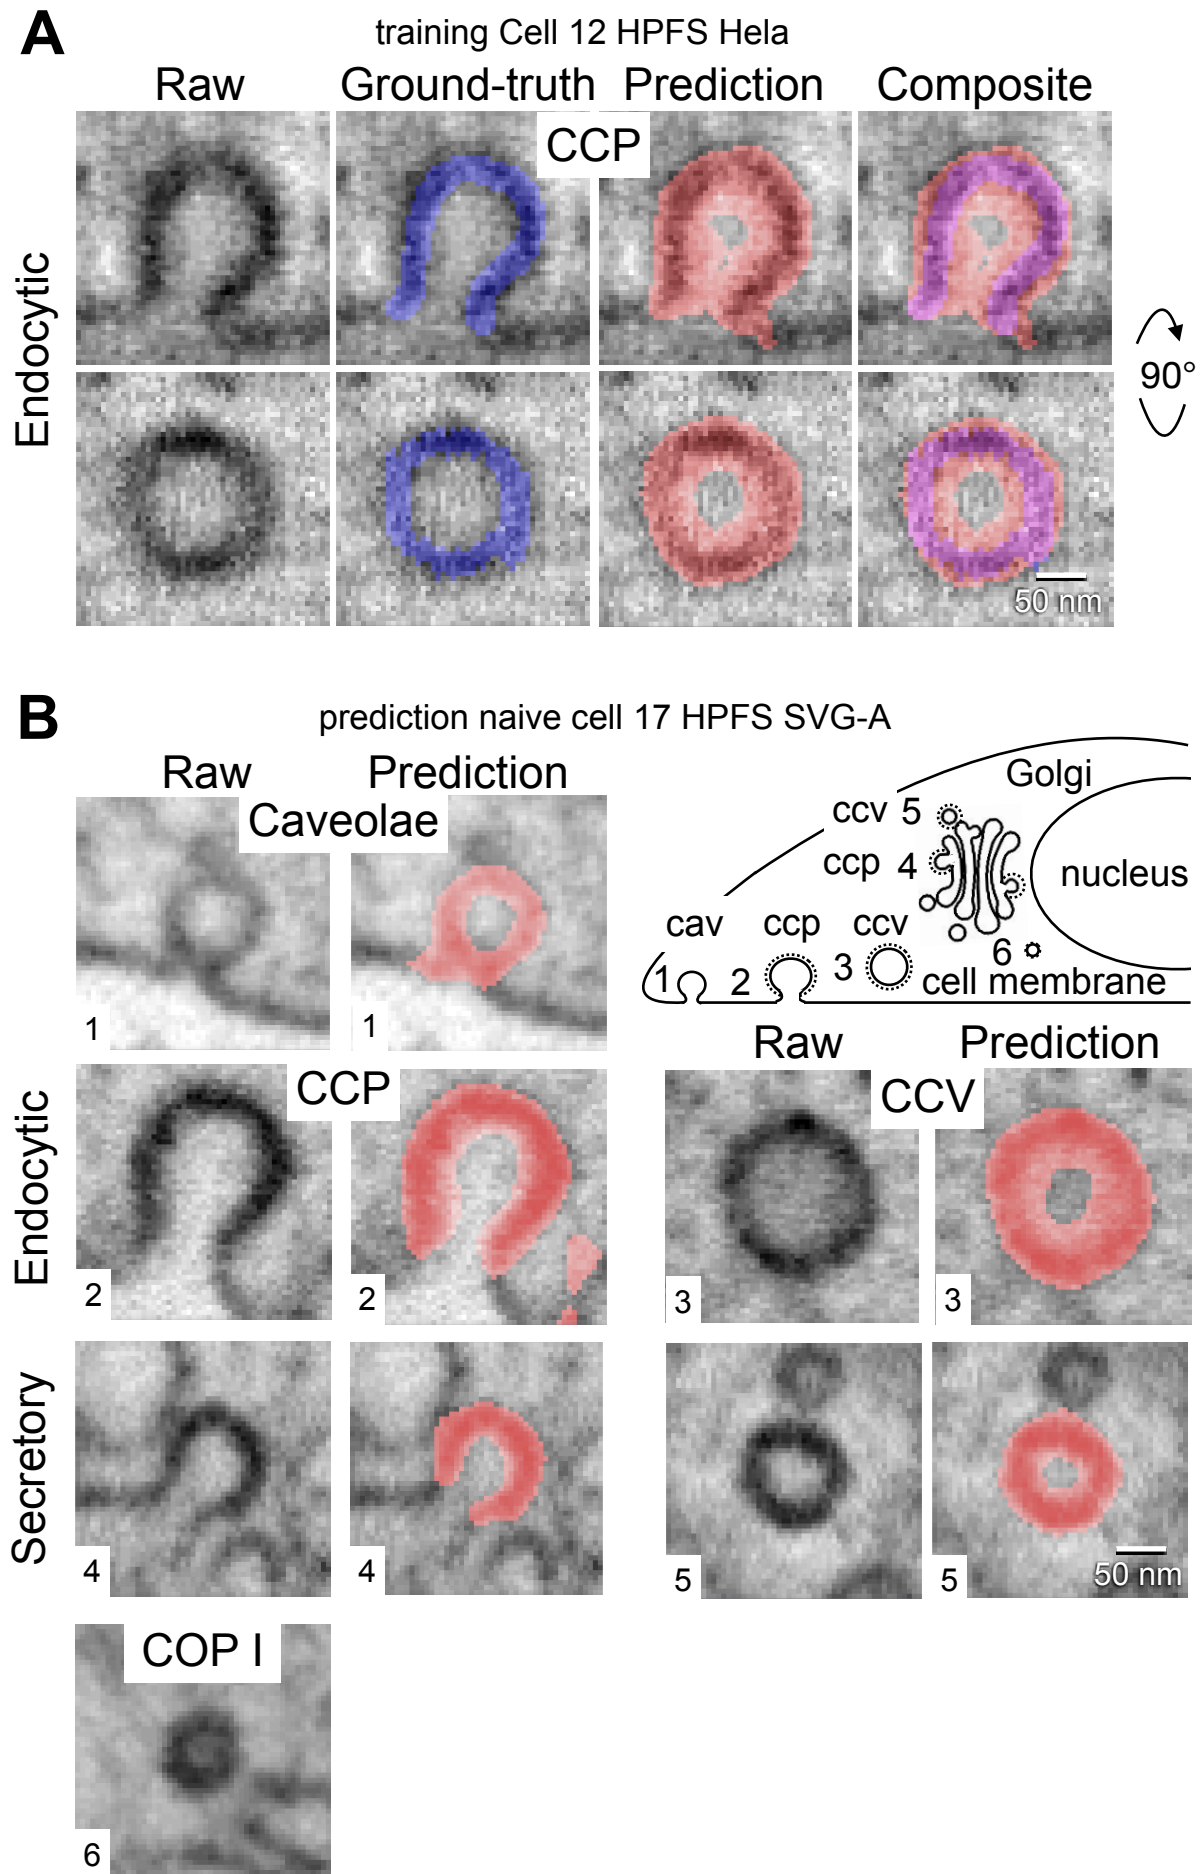

**Figure 7**

cell 17 HPFS SVG-A

**C**

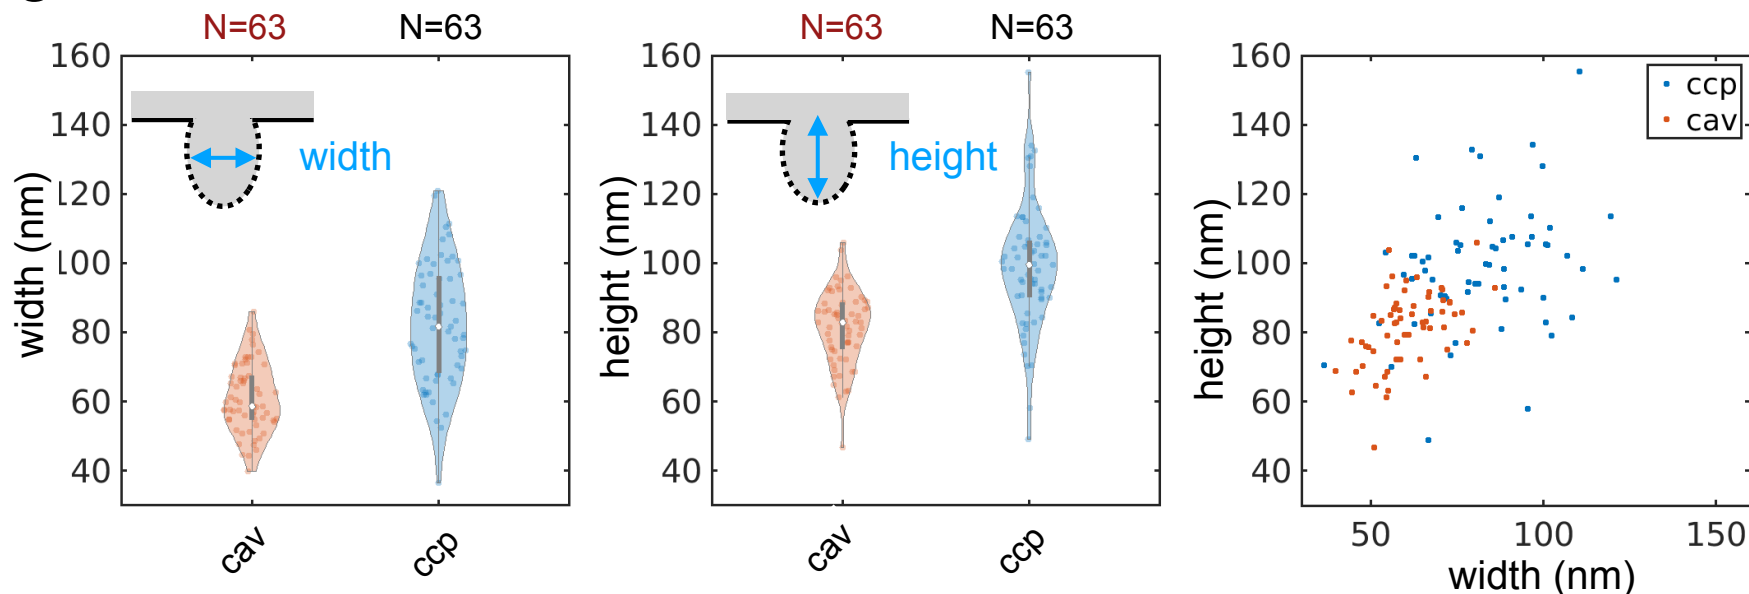

**D**

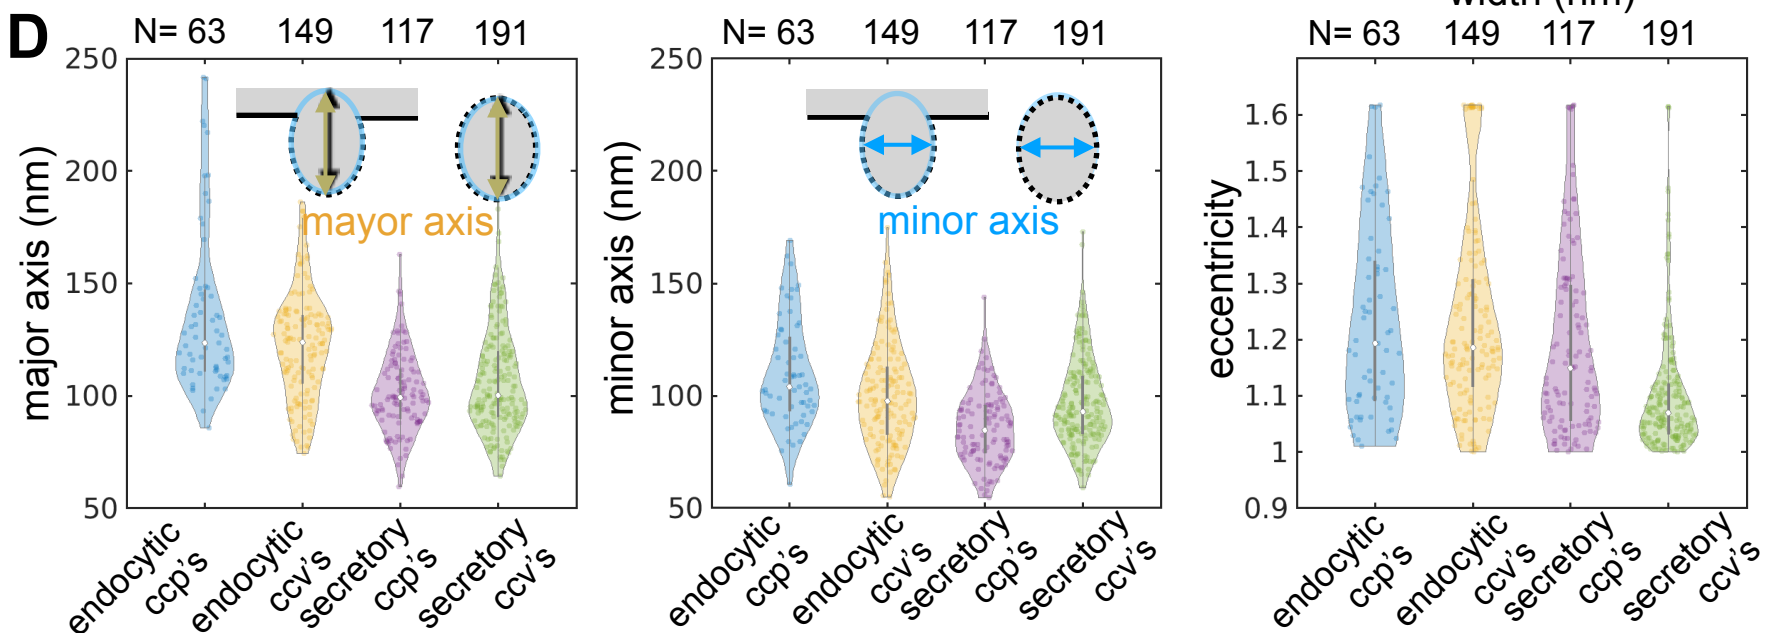

**E**

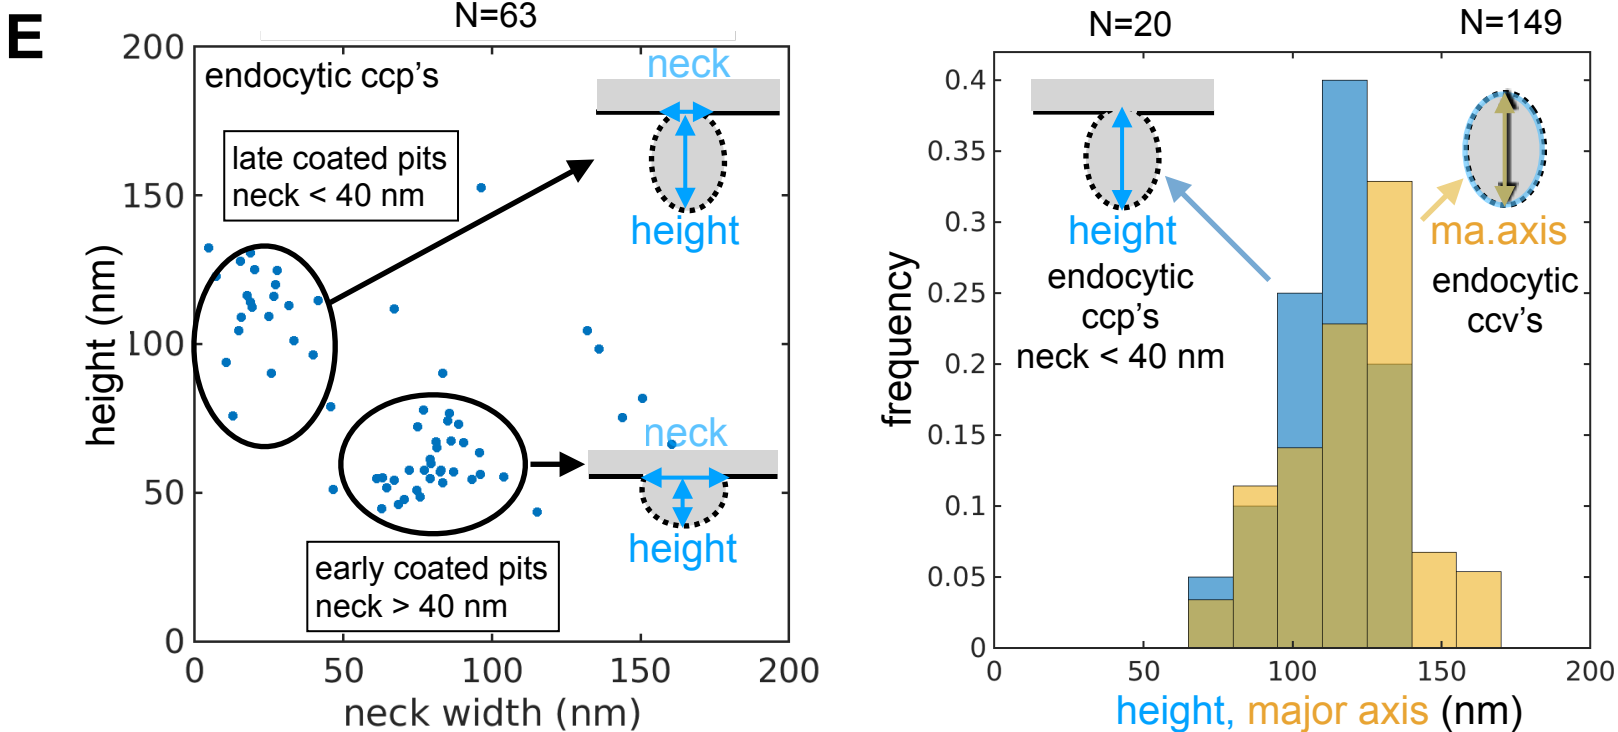

**Figure 7**
