# Supplementary material for: Deep neural network automated segmentation of cellular structures in volume electron microscopy
Source: bioRxiv or medRxiv preprint supplement (doi:10.1101/2022.08.02.502534), 2022-10-12
Supplement: Supplementary file [file media-5.pdf]

1 **Figure S1. Ground truth annotation workflow for mitochondria**

2 **(A)** Example to illustrate the sequential steps used with Ilastik Carving module to generate the  
3 ground truth annotation for a mitochondrion in Cell 1 HEK293A prepared by chemical fixation and  
4 visualized with ~ 5 nm isotropic resolution. Coarse annotations for background (yellow) and object  
5 (blue) drawn in broadly spaced consecutive planes of the stack were used to seed the Ilastik  
6 Carving module from which a binary mask spaced along adjacent planes spaced 5 nm in the z-  
7 stack and corresponding to the mitochondria ground annotation was generated (magenta).  
8 Manual corrections using VAST are used as needed, to remove incorrectly assigned pixels, in  
9 this example corresponding to an adjacent ER (white arrow).

10 **(B)** Volume rendering corresponding to the ground truth annotation of the mitochondrion shown  
11 in **(A)**. Scale bar, 500 nm.

12

13 **Figure S2. Ground truth annotation workflow for ER and Golgi apparatus**

14 **(A, B)** Example of graph-cut assisted segmentation used to generate the ground truth annotation  
15 for ER **(A)** or mitochondria **(B)** in Cell 1 HEK293A prepared by chemical fixation and visualized  
16 with ~ 5 nm isotropic resolution. Coarse annotations for background (lines, solid areas in pink)  
17 and object (dotted lines in yellow) drawn in the indicated broadly spaced planes of the stack were  
18 used as seeds to obtain the ground truth annotations spaced 5 nm apart generated by the graph-  
19 cut assisted segmentation program.

20

21 **Figure S3. 3D-Unet architecture**

22 Schematic representation of the steps used to train the 3D U-net encoder-decoder neural  
23 network. The input for the neural network mode are 3D blocks consisting of a stack of consecutive  
24 FIB-SEM images (size 204 x 204 x 204 voxels). The 3D block is subjected to consecutive 3 x 3 x  
25 3 convolutions without padding (purple) and down sampling operators with 2 x 2x 2 max-pooling  
26 (pink), followed by consecutive up sampling by a factor of 2 (yellow) of the feature maps. During  
27 up sampling, the feature maps are concatenated with previous feature maps from the down  
28 sampling branch that had been exposed to central cropping; this step also includes consecutive  
29 3 x 3 x 3 convolutions without padding (purple). The output of the neural network model is a  
30 feature map (size 110 x 110 x 110 voxels) of two channels, representing the foreground (FG) and  
31 background (BG = 1- FG) probability maps, respectively. Number of featured maps are denoted  
32 in red, spatial dimensions at the indicated steps in the neural network, in black. Figure designed  
33 based on PlotNeuralNet (<https://github.com/HarisIqbal88/PlotNeuralNet>) (adapted from  
34 (Sheridan et al., 2022).

35

36 **Figure S4. Examples of network behavior during training**

37 **(A-C)** Examples of plots of cross entropy loss used to evaluate the predicting behavior of the  
38 indicated neural network models for **(A)** Mitochondria, **(B)** Golgi or **(C)** ER obtained during training  
39 using FIB-SEM volume data of cells prepared by chemical fixation obtained at ~ 5 nm resolution.  
40 Cross entropy values were obtained using ground truth annotations from the training set or from  
41 naïve cells not used during training, respectively. The gray area shows the first appearance of  
42 relatively stable cross-entropy loss and absence of major spikes obtained by the models during  
43 20,000 consecutive training iterations; these models were then used to evaluate their network  
44 architecture and prediction performance.

45

46 **Figure S5. Use of CLAHE to equalize the contrast of FIB-SEM images**

47 **(A-D)** Single plane views of FIB-SEM volume data after contrast equalization using CLAHE with  
48 a clip limit of 0.02. The samples were prepared by CF **(A, B)** or HPFS **(C, D)** and imaged at ~ 5  
49 nm isotropic resolution.

50

51 **Figure S6. Comparison of metrics used to validate the prediction accuracy of neural  
52 models predicting mitochondria, ER and Golgi apparatus**

53 Ground truth annotations from FIB-SEM volume data from the indicated cells at ~ 5 nm isotropic  
54 resolution prepared by CF or HPFS were used for training to generate models for mitochondria,  
55 ER and Golgi apparatus. The histogram plots show F1, precision and recall metrics obtained  
56 using ground truth annotations not used for training. The results also show metrics obtained after  
57 fine-tuning with a small number of additional training iterations using ground truth annotations  
58 from the naïve cell. Details of datasets, ground-truth annotations and models are summarized in  
59 Tables S4, S5 and S2.

60

61 **Figure S7. Steps to determine the diameter of the nuclear pore membrane**

62 **(A)** Nuclear pore predictions for all the pores on the nuclear envelope of naïve interphase cell 19  
63 (Hela-2) prepared by HPFS and visualized at 4 x 4 x 5.3 nm isotropic resolution. The nuclear pore  
64 predictions were obtained using model 1986 trained without fine tuning with ground truths  
65 annotations for Cell 13 (Hela) prepared by HPFS and imaged at ~ 5 nm isotropic resolution.

66 **(B)** Volume location of the centroid of each of the predicted nuclear pore's color coded according  
67 to their relative position along the Z-axis (top panel) and surface rendition of the nuclear envelope

68 (green) obtain by alpha-shape triangulation of the centroids (see Methods). Orthonormal vectors  
69 associated with each triangle are shown (red).

70 **(C)** Example of realignment of a nuclear pore from its acquisition orientation in the FIB-SEM  
71 volume image to a new view with the nuclear envelope orthogonal to the Z-axis; side views and  
72 volume rendition of the nuclear pore prediction are shown.

73 **(D)** Single plane on face and orthogonal views of a nuclear pore centered on the middle of the  
74 nuclear envelope (left panels) and examples of the intensity plots used to estimate the membrane  
75 pore diameters by determining the distance separating the two intensity minima along the  
76 indicated axis (right panels). The nuclear pore diameter is reported as the average of 10 values  
77 obtained  $18^\circ$  apart (inset in left panel).

78 **(E)** Three-dimensional distribution of nuclear pores on the nuclear envelopes of Cells 15 and 17  
79 color coded by a heat map as a function of membrane pore diameter.

80

81 **Figure S8. Definition of metrics used to characterize clathrin coated structures.**

82 **(A)** Schematic representation of the timeline to describe the formation of a clathrin coated pit  
83 mediated by the assembly of the clathrin coat (Kirchhausen et al., 2014). The last step mediated  
84 by fission of the membrane neck connecting the mature coated pit from the originating membrane  
85 results in formation of the fully formed coated vesicle. Metrics of neck width, pit height, full width  
86 at half maximum and major and minor axis of the fitted ellipse used to morphologically describe  
87 the clathrin coated pits are shown.

88 **(B)** Metrics used to characterize clathrin coated vesicles.

89 **(C)** Example of a single plane from a selected endocytic clathrin coated pit in a cell prepared by  
90 HPFS and imaged by FIB-SEM at  $\sim 5$  nm isotropic resolution. The darker voxels corresponding  
91 to the deformed membrane and the coat surrounding the pit (left panel) were segmented using  
92 an Otsu-based intensity threshold approach (Otsu, 1979) to generate a skeletonized binary mask  
93 (central panel) which was then used to fit the ellipse (right panel).

94

95 **Figure S9. Identification of clathrin coated pits, coated vesicle.**

96 Data shown in this figure for Cells 12, 13, 17 and 17 were generated using the coated pit model  
97 employed in Fig 7 obtained by training with ground truth annotations from Cell 12 prepared by  
98 HPFS and imaged at  $\sim 5$  nm isotropic resolution.

99 **(A)** Violin plots of major and minor axis and eccentricity of the fitted ellipse of all pits and vesicles  
100 in the raw images of the structures identified by the coated pit model.

101 **(B)** Scatter plot of height versus neck width of endocytic clathrin coated pits clustered in two  
102 groups associated with early and late stages of pit formation (left panel). The histogram compares  
103 height and major axis for the fitted ellipse of late endocytic coated pits and coated vesicles,  
104 respectively.

105 **(C)** Scatter plot of height versus neck width of 'secretory' clathrin coated pits associated with  
106 internal membranes.

107

108 **Figure S10. F1 as a metric to compare ground truth annotations with model predictions**

109 Ground truth annotations consist of true positive (TP) and false negatives (FN) voxels and define  
110 presence or absence of a perfect match with the subcellular structure of interest. The model  
111 predicts voxels with true (TP) and false positives (FP) values, depending on whether it considers  
112 them as representing or not the structure of interest. F1, as defined in the figure, is used as a  
113 practical metric to evaluate the prediction accuracy of the neural network to identify the structure  
114 of interest. A perfect model prediction would yield  $F1=1$  with  $FP=0$ ,  $FN=0$ .

115



116 **References**

117 Chou, Y.-Y., Upadhyayula, S., Houser, J., He, K., Skillern, W., Scanavachi, G., Dang, S.,  
118 Sanyal, A., Ohashi, K.G., Caprio, G.D., et al. (2021). Inherited nuclear pore substructures  
119 template post-mitotic pore assembly. *Developmental Cell*.

120 Kirchhausen, T., Owen, D., and Harrison, S.C. (2014). Molecular structure, function, and  
121 dynamics of clathrin-mediated membrane traffic. *Cold Spring Harbor Perspectives in Biology* 6,  
122 a016725.

123 Otsu, N. (1979). A Threshold Selection Method from Gray-Level Histograms. *Ieee Transactions*  
124 *Syst Man Cybern* 9, 62–66.

125 Sheridan, A., Nguyen, T., Deb, D., Lee, W.-C.A., Saalfeld, S., Turaga, S., Manor, U., and  
126 Funke, J. (2022). Local Shape Descriptors for Neuron Segmentation. *Biorxiv*  
127 2021.01.18.427039.

128

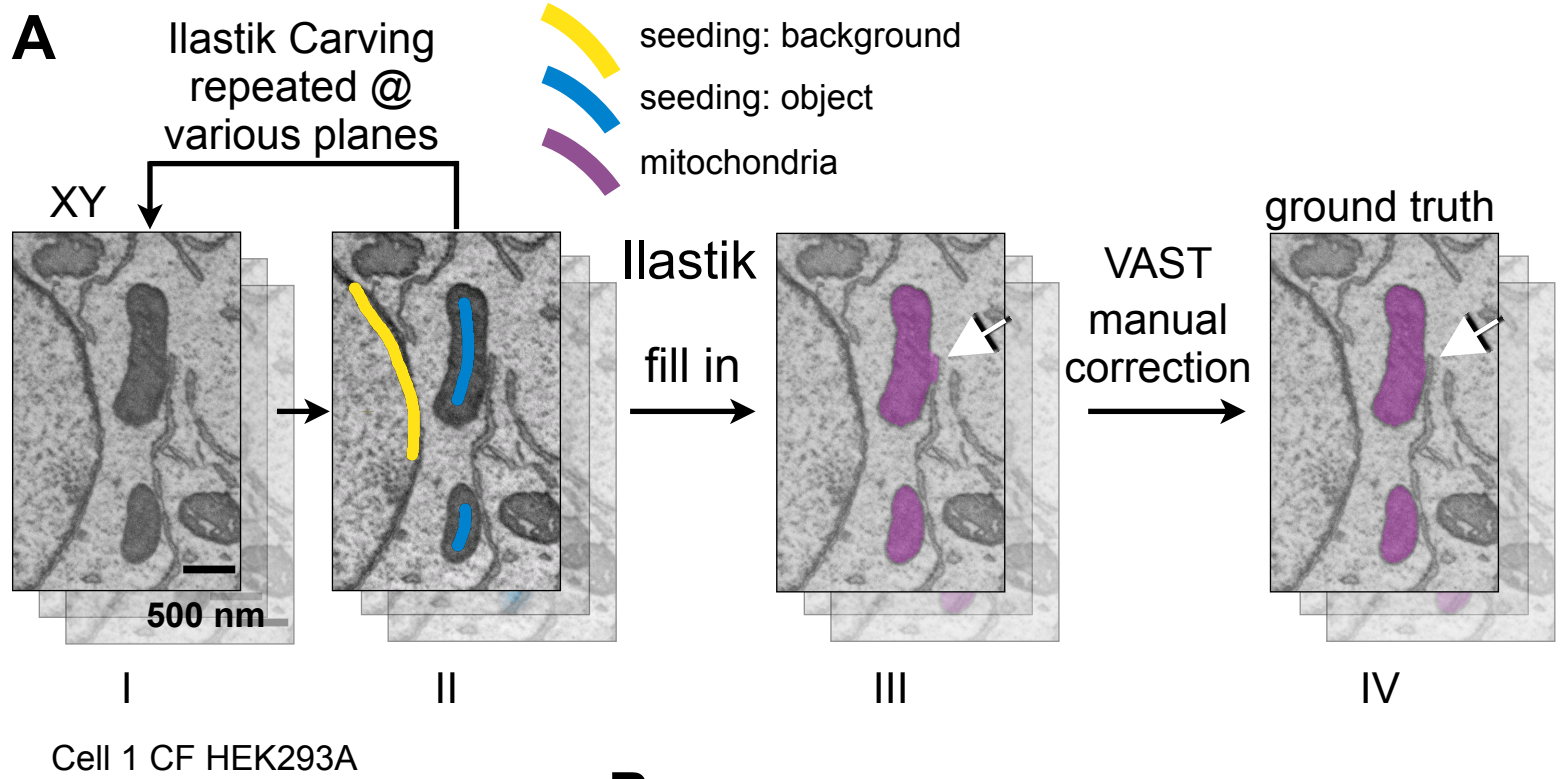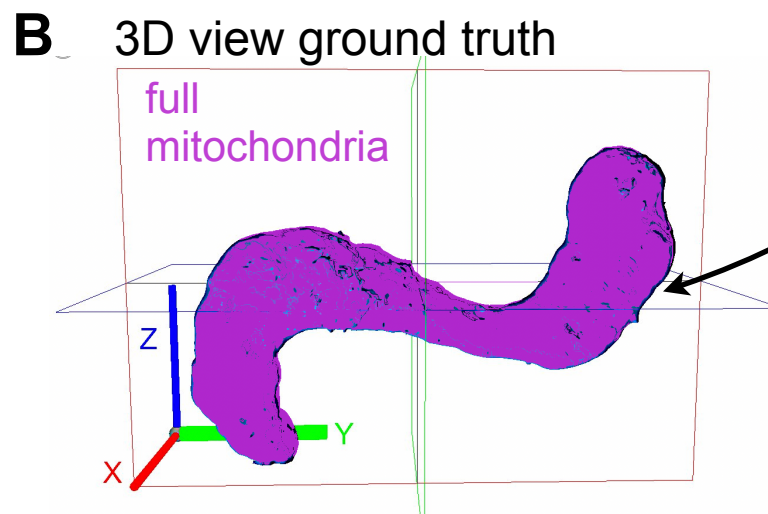

**Figure S1**

# A Graph-cut assisted segmentation: ER

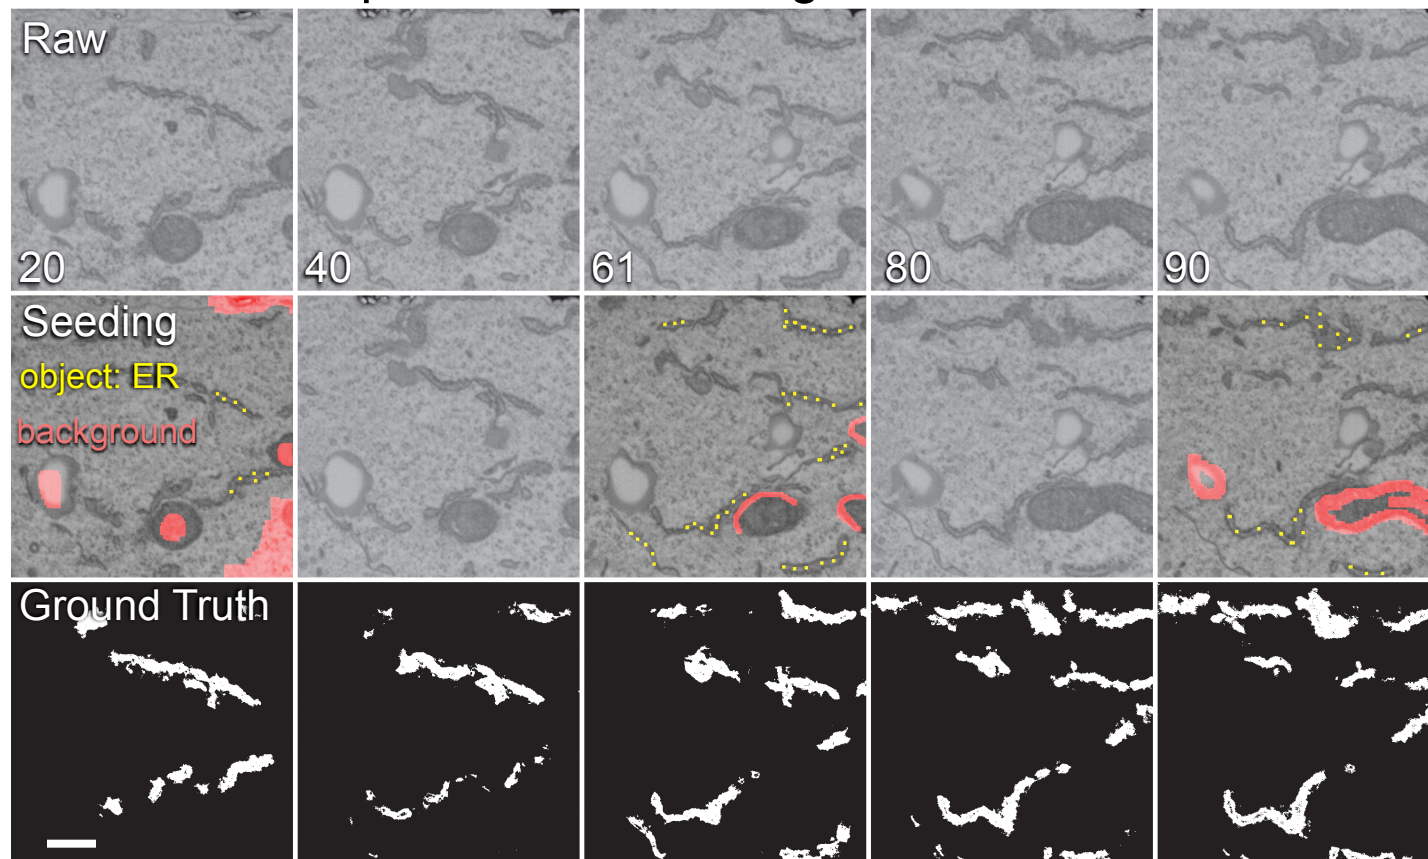

Cell 1 CF HEK293A

# B Graph-cut assisted segmentation: Golgi apparatus

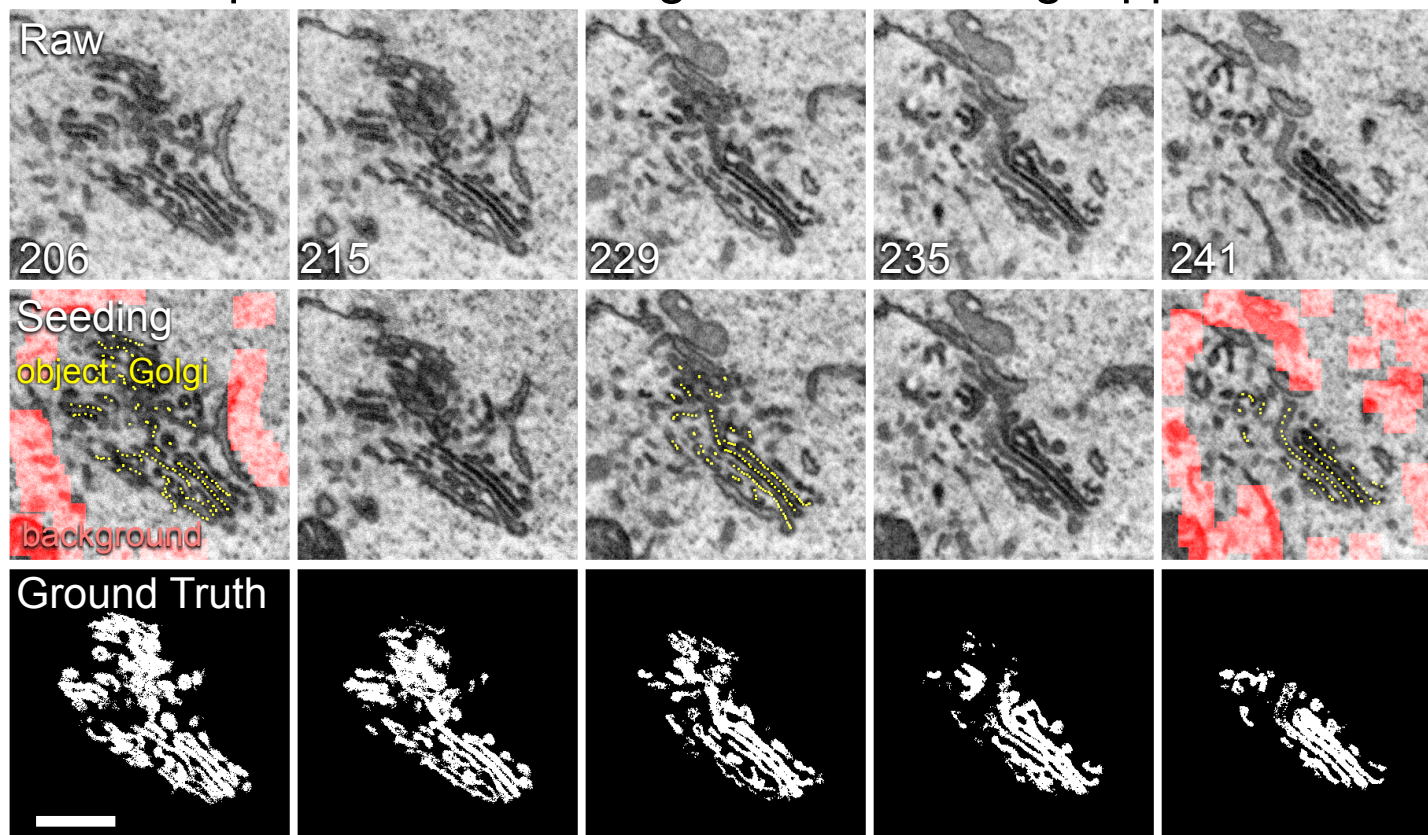

Cell 1 CF HEK293A

# 3D U-net: 3D convolutional neural network

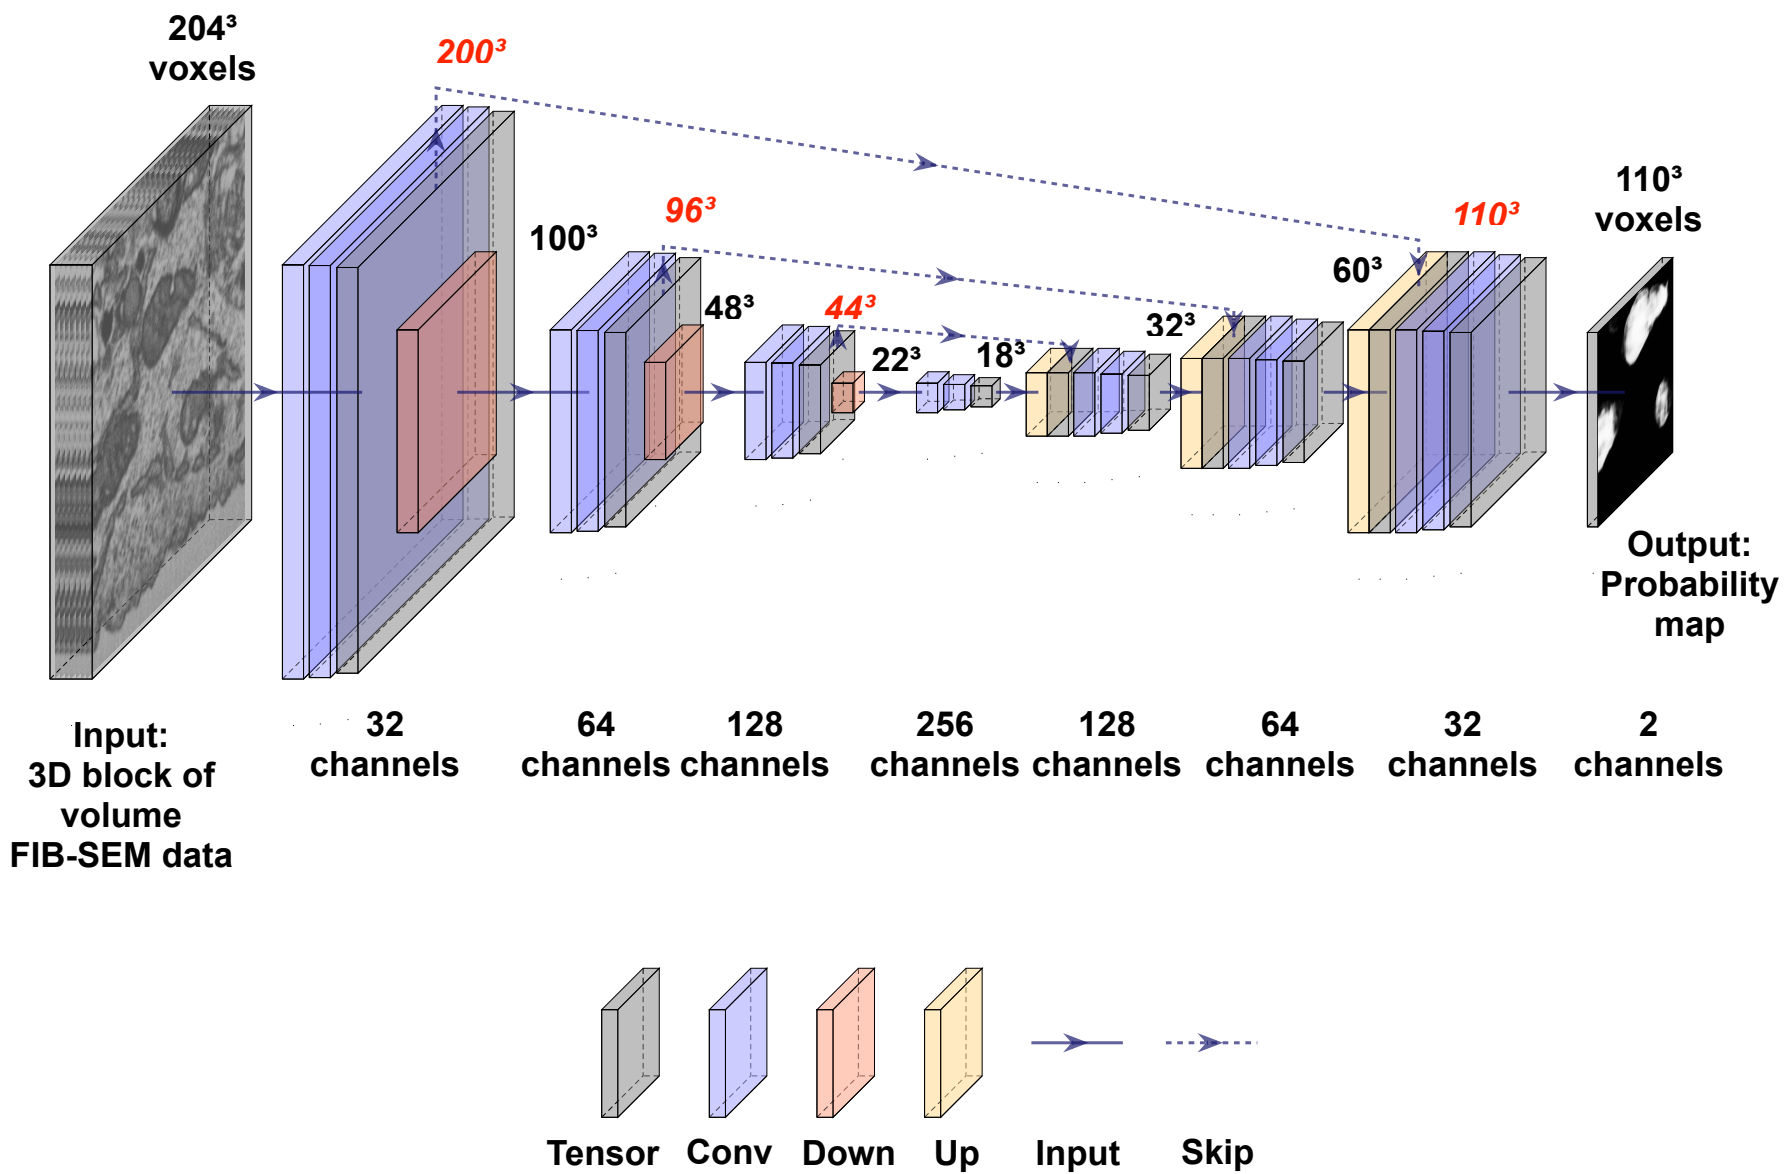

Figure S3



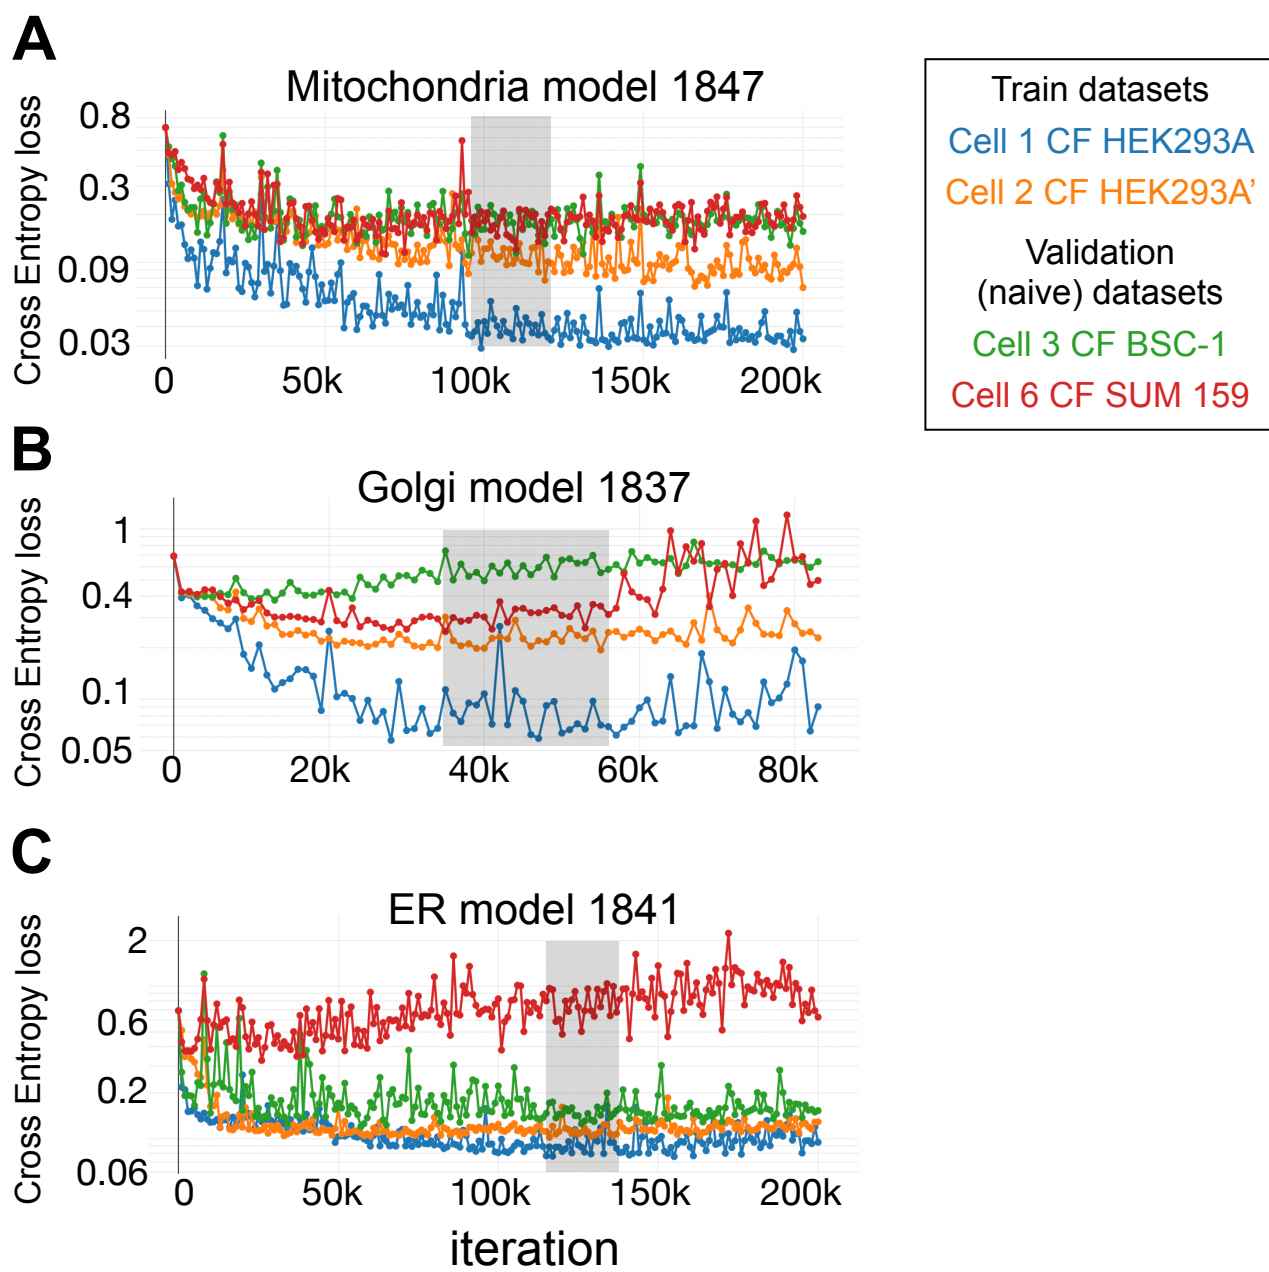

**Figure S4**

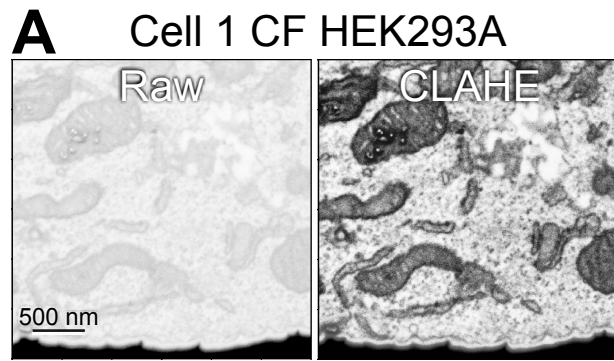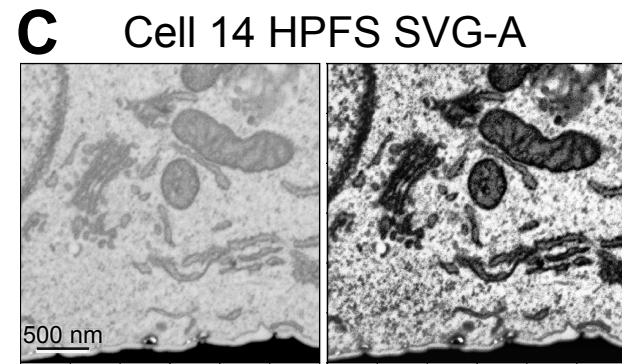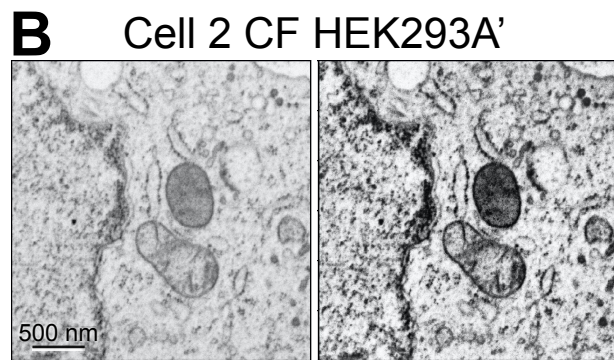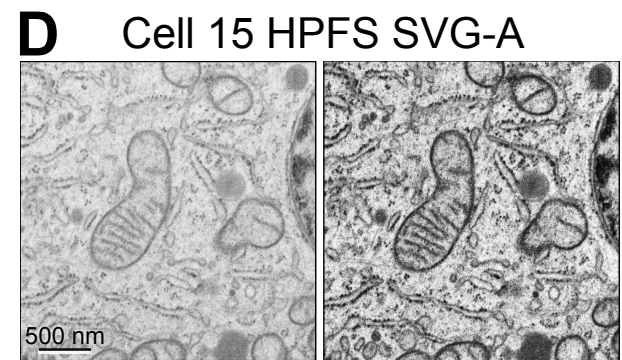

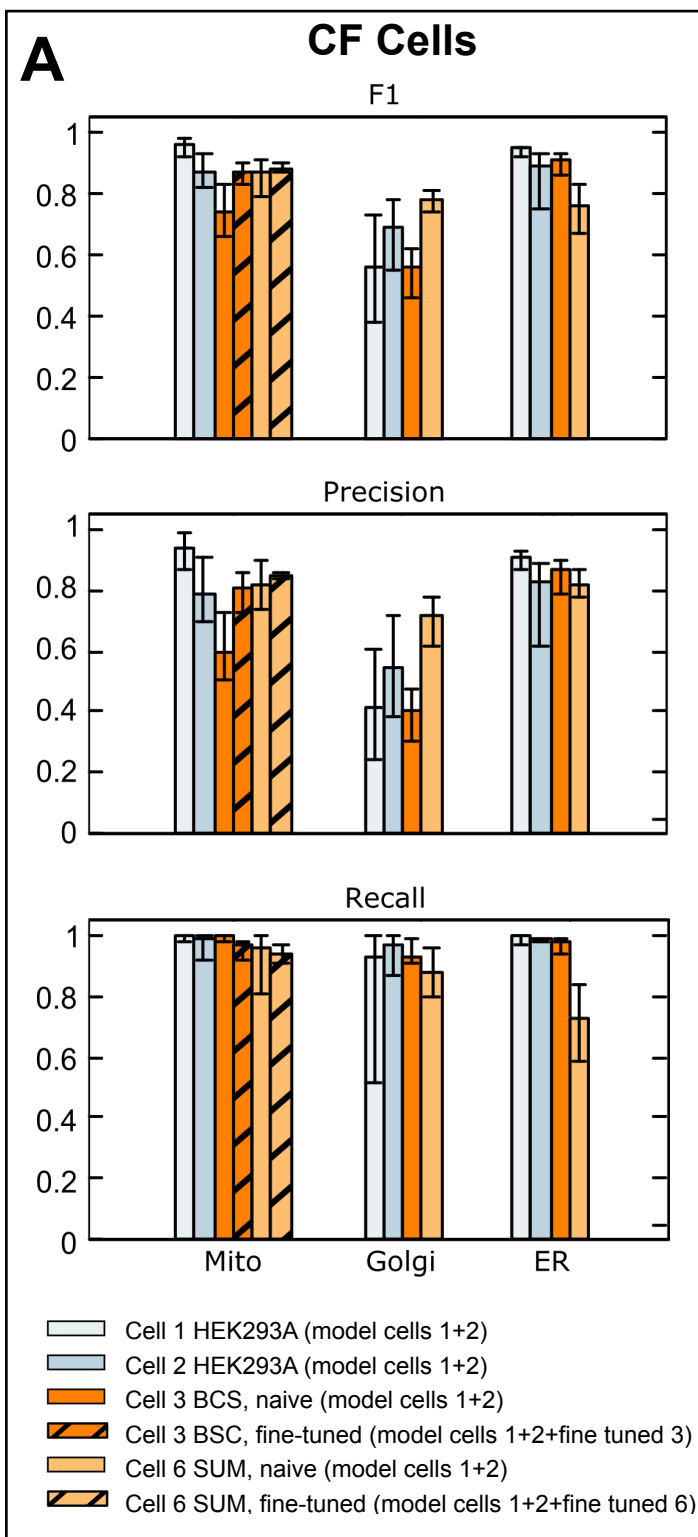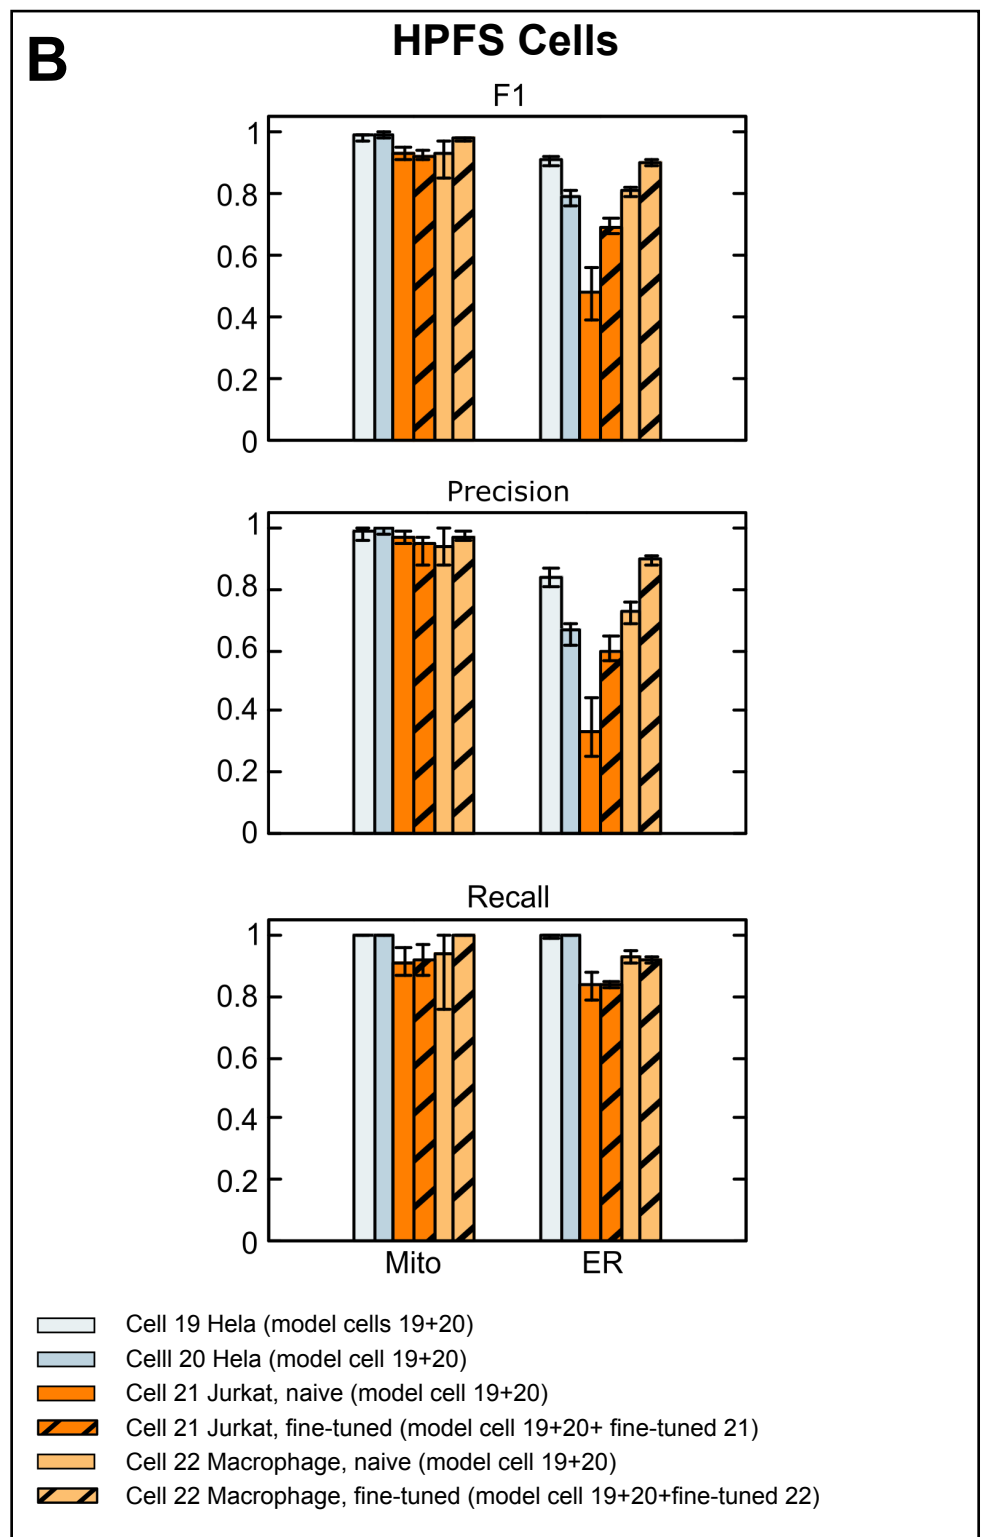

Figure S6

**A**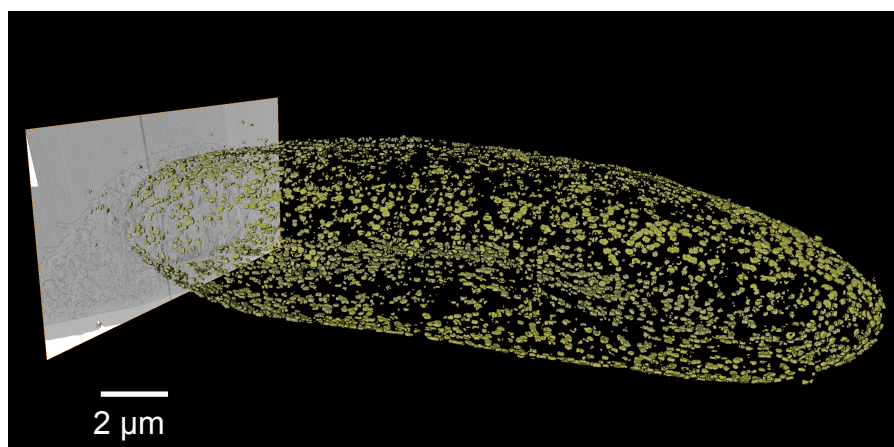**B**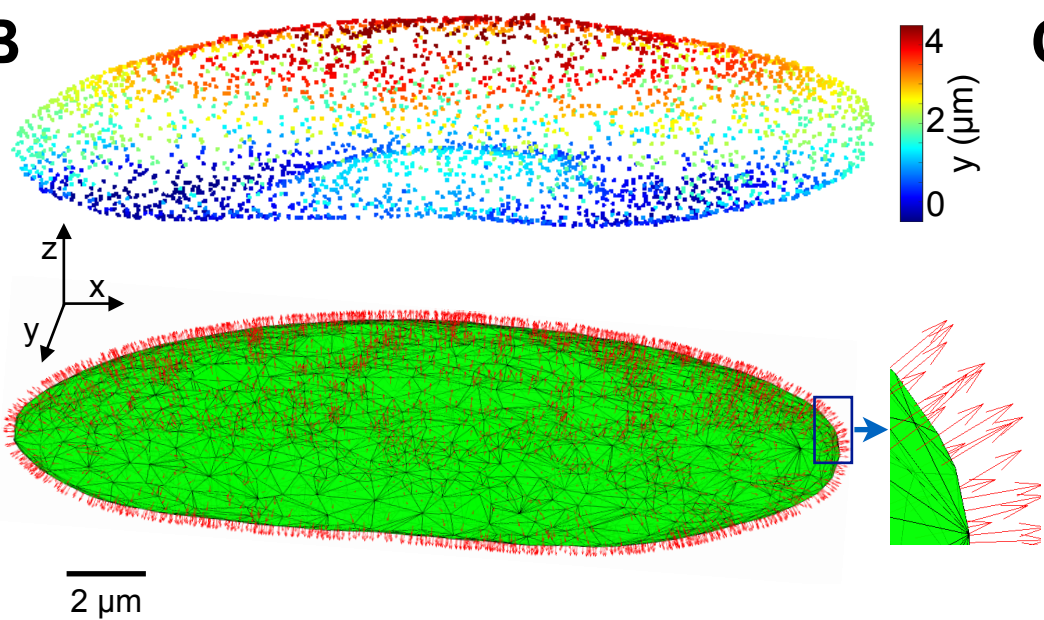**C**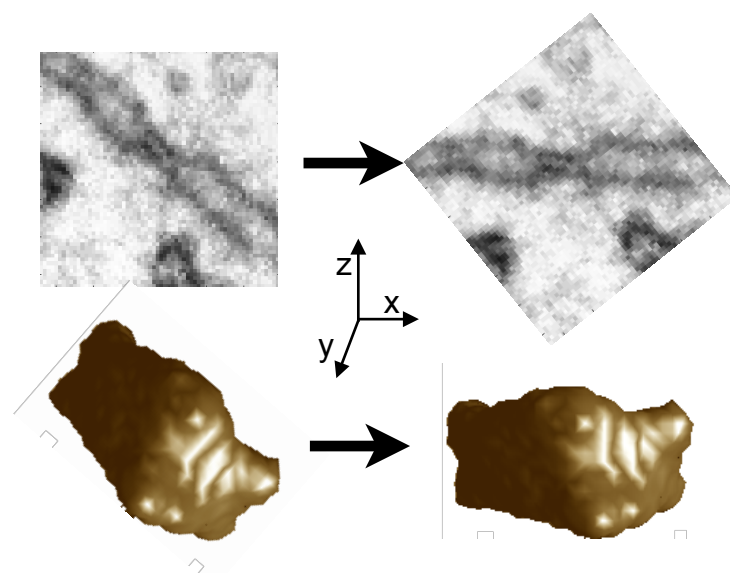**D**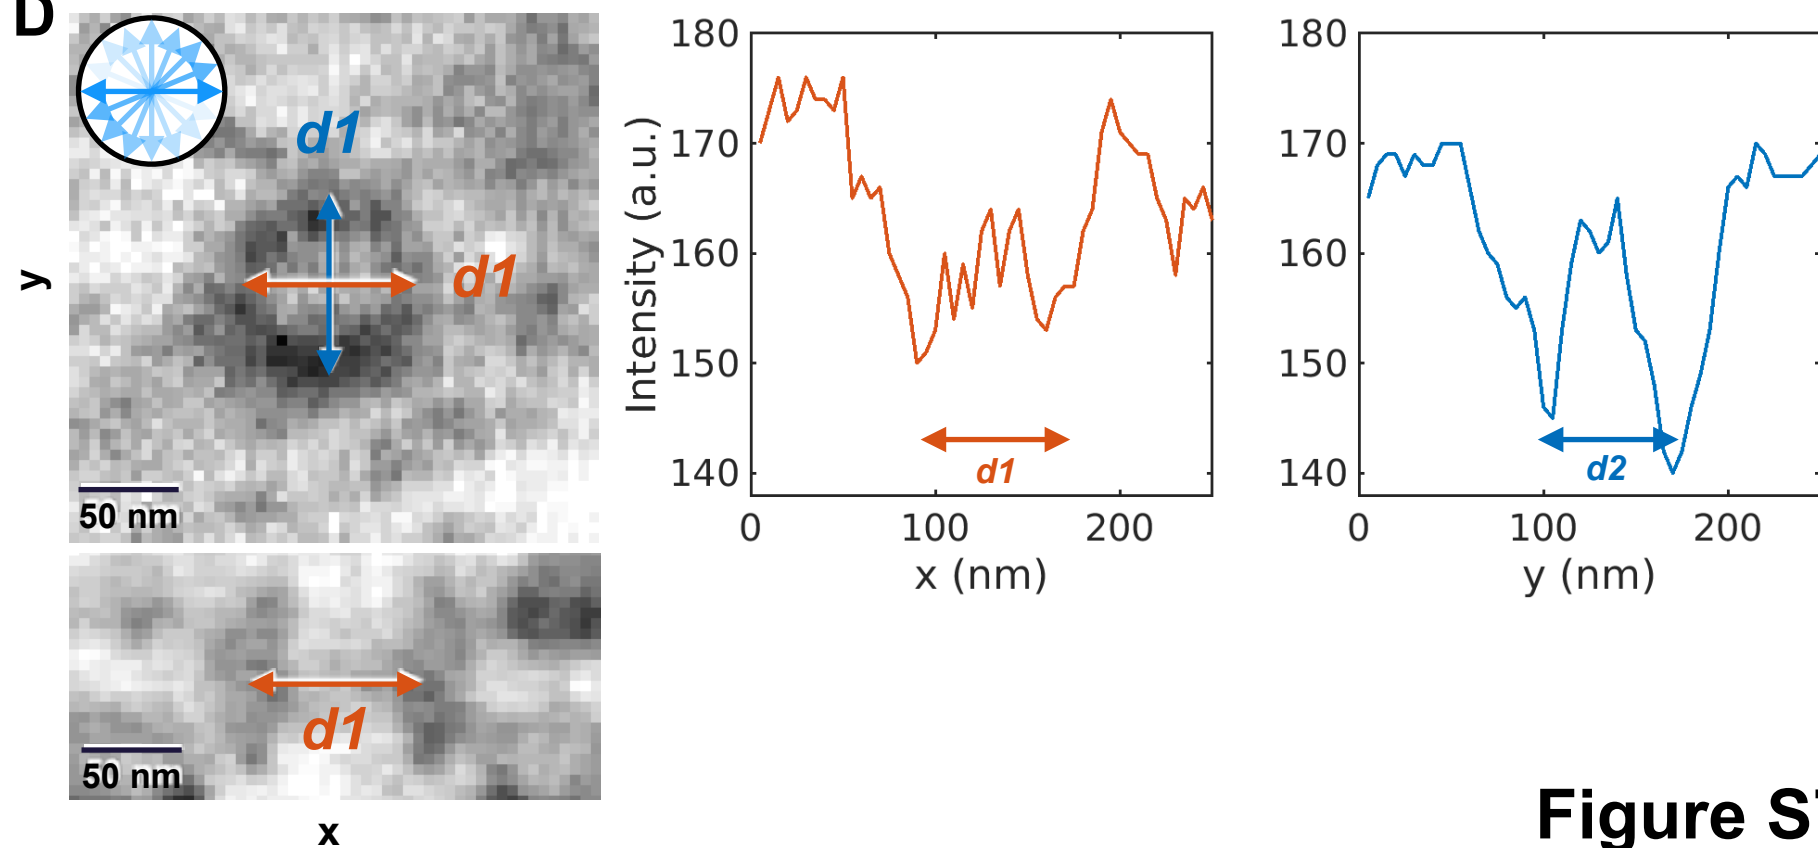**Figure S7**



**F**

Cell 15 HPFS SVG-A, N=305

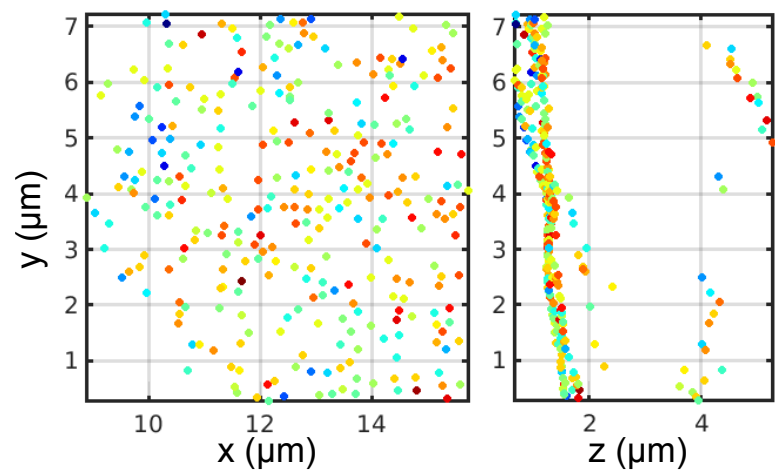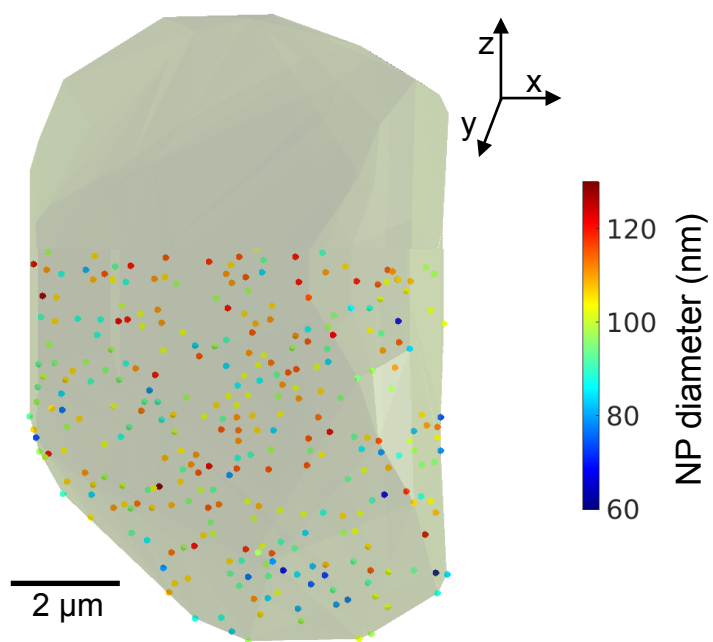

Cell 17 HPFS SVG-A, N=135

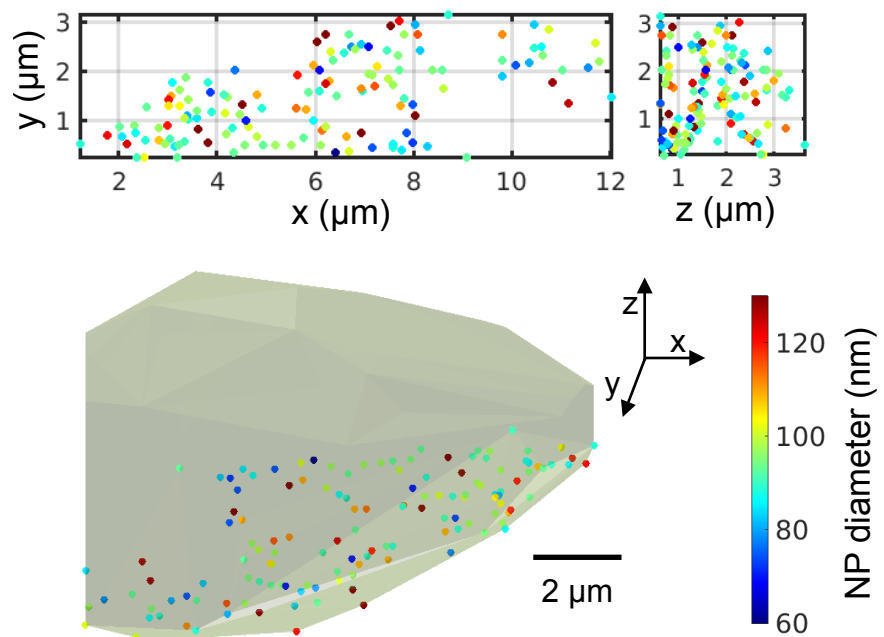**Figure S7**

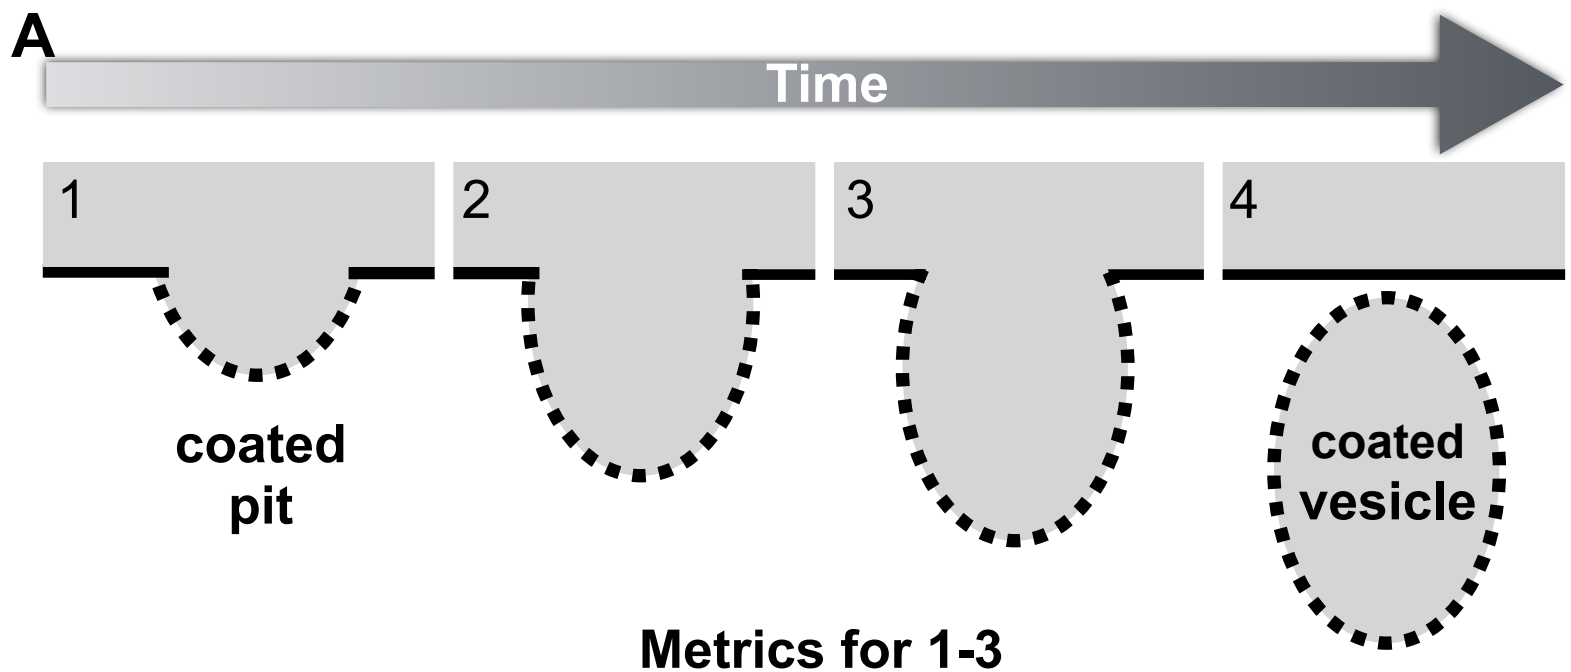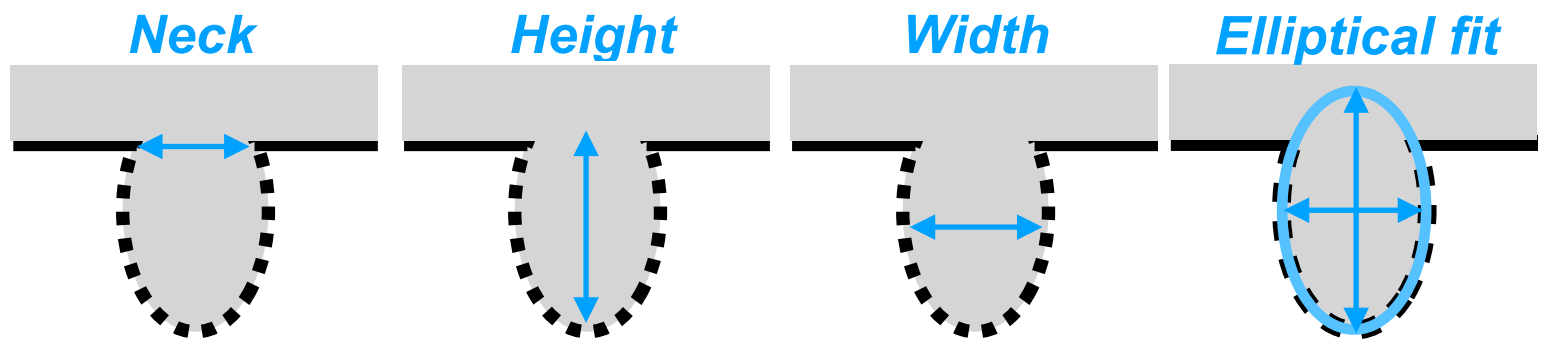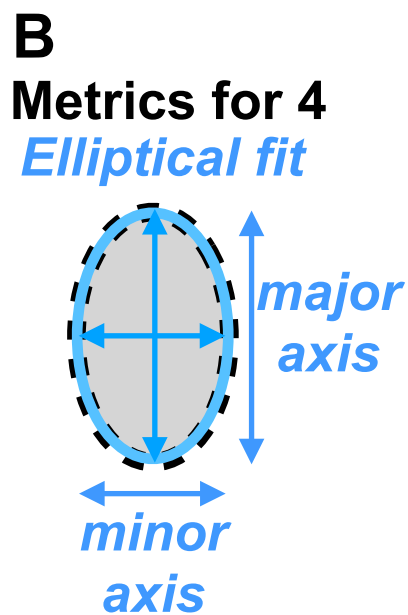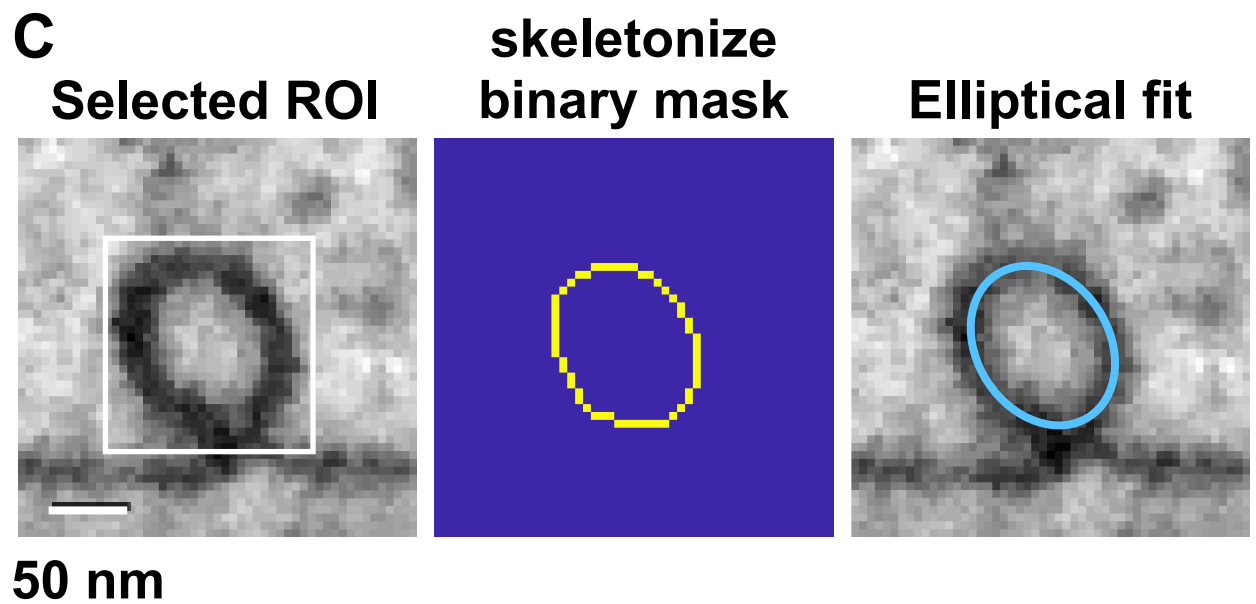

**Figure S8**

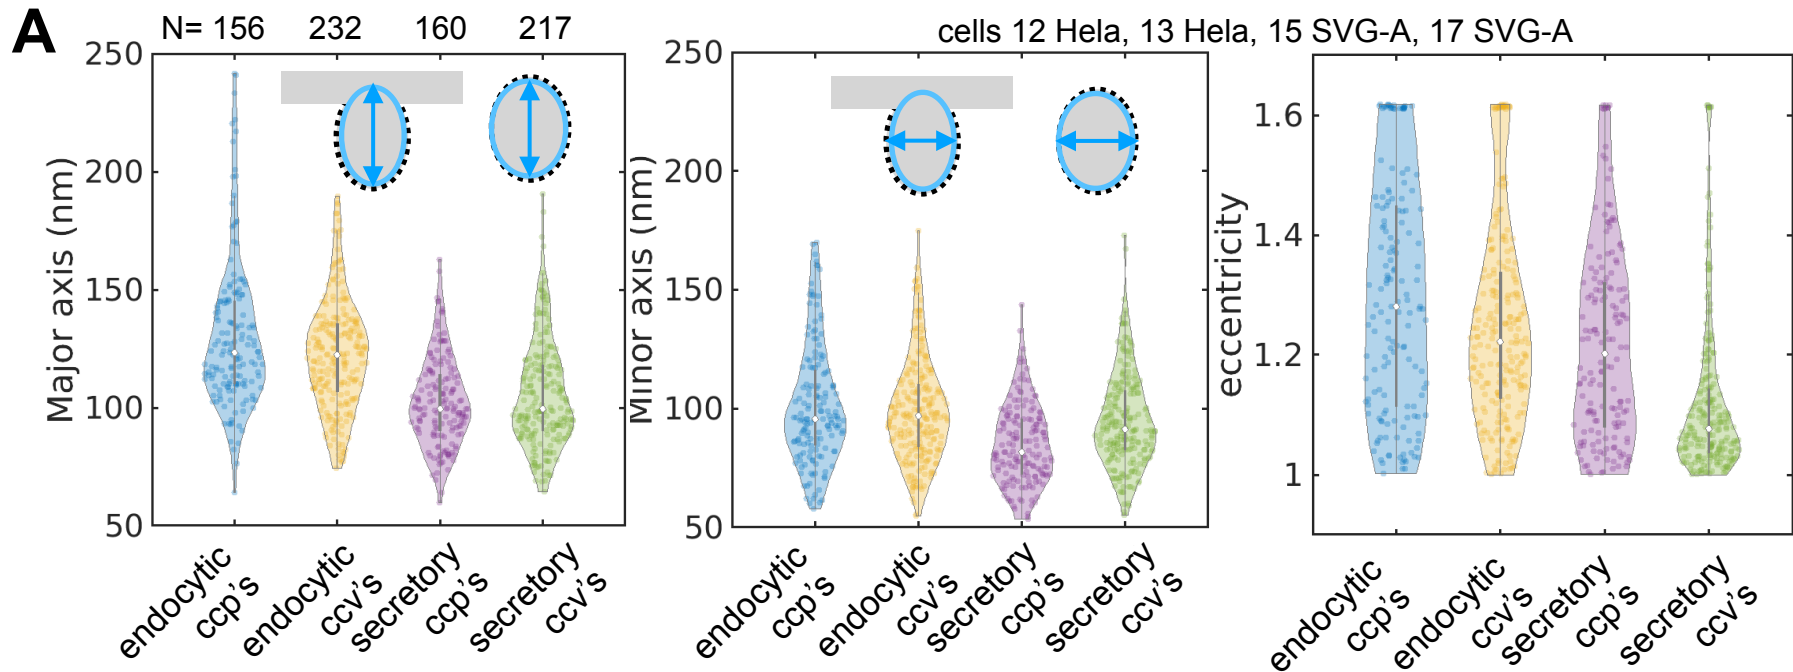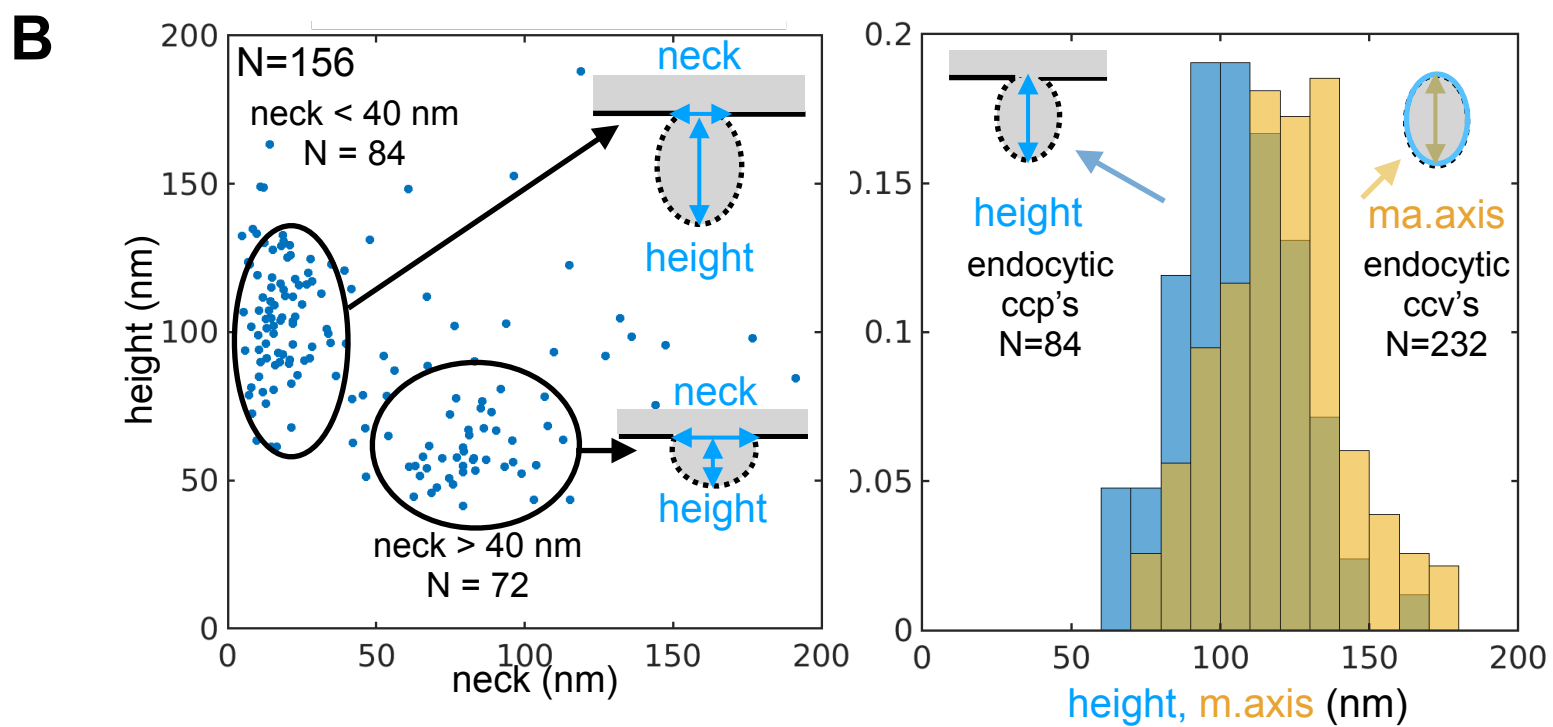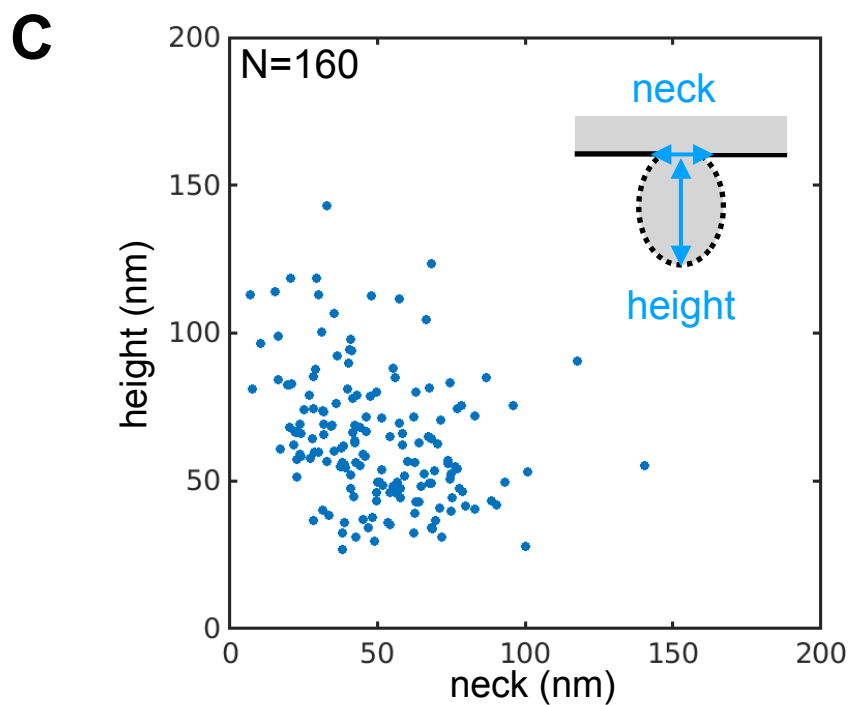

**Figure S9**

# definition of metrics

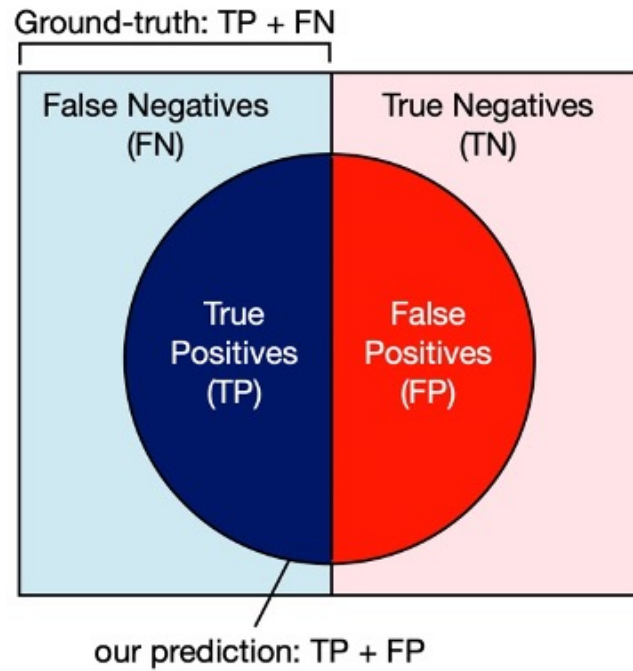

$$F1 = \frac{TP}{TP + (FP + FN) / 2}$$

## Table S1. Cells used in this study

### Cell 1, 1a

*Description:* HEK293A human epithelial derived cell stably expressing eGFP-connexin43 (ATCC, cri-1573)  
*Protocol:* Chemical fixation  
*Contributions:* Sample provided by Teresa Rodrigues and Henrique Girão (Universidade de Coimbra), prepared for imaging by Giovanni de Nola and Teresa Rodrigues; imaging and pre-processing by Tegye John Vadakkan; post-processing by Ben Gallusser  
*Publication:* this study  
*Voxel size:* 5 nm x 5 nm x 5 nm

### Cell 2

*Description:* HEK293A human epithelial derived cell stably expressing eGFP-connexin43 (ATCC, cri-1573)  
*Protocol:* Chemical fixation  
*Contributions:* Sample provided by Teresa Rodrigues and Henrique Girão (Universidade de Coimbra), prepared for imaging by Giovanni de Nola and Teresa Rodrigues; imaging and pre-processing by Tegye John Vadakkan; post-processing by Ben Gallusser  
*Publication:* this study  
*Voxel size:* 5 nm x 5 nm x 5 nm

### Cell 3

*Description:* BSC-1 African green monkey kidney epithelial derived cells stably expressing Lamp1-eGFP and mCherry-Galectin3  
*Protocol:* Chemical fixation  
*Contributions:* Sample prepared by Teresa Rodrigues (Universidade de Coimbra), prepared for imaging by Giovanni de Nola and Teresa Rodrigues; imaging and pre-processing by Tegye John Vadakkan; post-processing by Ben Gallusser  
*Publication:* this study  
*Voxel size:* 5 nm x 5 nm x 5 nm

### Cell 4

*Description:* BSC-1 African green monkey kidney epithelial derived cells stably expressing Lamp1-eGFP and mCherry-Galectin3  
*Protocol:* Chemical fixation  
*Contributions:* Sample prepared by Teresa Rodrigues, prepared for imaging by Giovanni de Nola and Teresa Rodrigues; imaging and pre-processing by Tegye John Vadakkan; post-processing by Ben Gallusser  
*Publication:* this study  
*Voxel size:* 5 nm x 5 nm x 5 nm

### Cell 5

*Description:* SVG-A human fetal glial derived cells  
*Protocol:* Chemical fixation  
*Contributions:* Prepared for imaging by Rasmus Herlo and Max Paget; imaging and pre-processing by Tegye John Vadakkan; post-processing by Ben Gallusser  
*Publication:* (Chou et al., 2021)  
*Voxel size:* 5 nm x 5 nm x 5 nm

### Cell 6, 6a

*Description:* interphase SUM159 human breast carcinoma derived cell gene edited to express eGFP-Nup133  
*Protocol:* Chemical fixation  
*Contributions:* Prepared for imaging by Justin Houser; imaging and pre-processing by Tegye John Vadakkan; post-processing by Ben Gallusser  
*Publication:* (Chou et al., 2021)  
*Voxel size:* 5 nm x 5 nm x 5 nm

### Cell 7

*Description:* mitotic SUM159 human breast carcinoma derived cell gene edited to express eGFP-Nup133  
*Protocol:* Chemical fixation  
*Contributions:* Prepared for imaging by Justin Houser; imaging and pre-processing by Tegye John Vadakkan; post-processing by Ben Gallusser  
*Publication:* (Chou et al., 2021)  
*Voxel size:* 5 nm x 5 nm x 5 nm

### Cell 8

**Description:** pro-metaphase SUM159 human breast carcinoma derived cell gene edited to express eGFP-Nup133  
**Protocol:** Chemical fixation  
**Contributions:** Prepared for imaging by Justin Houser; imaging and pre-processing by Justin Houser; post-processing by Ben Gallusser  
**Publication:** (Chou et al., 2021)  
**Voxel size:** 10 nm x 10 nm x 10 nm

#### **Cell 9**

**Description:** interphase SUM159 human breast carcinoma derived cell gene edited to express eGFP-Nup133  
**Protocol:** Chemical fixation  
**Contributions:** Prepared for imaging by Justin Houser; imaging and pre-processing by Justin Houser; post-processing by Ben Gallusser  
**Publication:** (Chou et al., 2021)  
**Voxel size:** 10 nm x 10 nm x 10 nm

#### **Cell 11**

**Description:** interphase U2OS human sarcoma derived cell  
**Protocol:** HPFS  
**Contributions:** Prepared for imaging by Gleb Shtengel (HHMI/Janelia) and C. Shan Xu (HHMI/Janelia); post-processing by Ben Gallusser  
**Publication:** this study  
**Voxel size:** 8 nm x 8 nm x 8 nm

#### **Cell 12**

**Description:** HeLa cell  
**Protocol:** HPFS  
**Contributions:** Sample provided and prepared for imaging by HHMI/Janelia; imaging and pre-processing by Tegye John Vadakkan  
**Publication:** this study  
**Voxel size:** 5 nm x 5 nm x 5 nm

#### **Cell 13**

**Description:** HeLa cell  
**Protocol:** HPFS  
**Contributions:** Sample provided and prepared for imaging by HHMI/Janelia; imaging and pre-processing by Tegye John Vadakkan  
**Publication:** this study  
**Voxel size:** 5 nm x 5 nm x 5 nm

#### **Cell 13a**

**Description:** SVG-A human fetal glial derived cells stably expressing mCherry-Galectin8  
**Protocol:** HPFS  
**Contributions:** Prepared for imaging by Anwesha Sanyal and Elliott Somerville; imaging and pre-processing by Tegye John Vadakkan  
**Publication:** this study  
**Voxel size:** 5 nm x 5 nm x 5 nm

#### **Cell 15**

**Description:** SVG-A human fetal glial derived cells stably expressing mCherry-Galectin8  
**Protocol:** HPFS  
**Contributions:** Sample provided by Anwesha Sanyal, prepared for imaging by Anwesha Sanyal and Elliott Somerville; imaging and pre-processing by Tegye John Vadakkan  
**Publication:** this study  
**Voxel size:** 5 nm x 5 nm x 5 nm

#### **Cell 16**

**Description:** SVG-A human fetal glial derived cells stably expressing mCherry-Galectin8  
**Protocol:** HPFS  
**Contributions:** Sample provided by Anwesha Sanyal, prepared for imaging by Anwesha Sanyal and Elliott Somerville; imaging and pre-processing by Tegye John Vadakkan  
**Publication:** this study  
**Voxel size:** 5 nm x 5 nm x 5 nm

**Cell 17**

*Description:* SVG-A human fetal glial derived cells stably expressing mCherry-Galectin8  
*Protocol:* HPFS  
*Contributions:* Sample provided by Anwesha Sanyal, prepared for imaging by Anwesha Sanyal and Elliott Somerville; imaging and pre-processing by Tegya John Vadakkan  
*Publication:* this study  
*Voxel size:* 5 nm x 5 nm x 5 nm

**Cell 19**

*Description:* HeLa-2 Wild-type, interphase HeLa cell (ATCC CCL-2)  
*Protocol:* HPFS  
*Contributions:* Sample provided by Aubrey Weigel (HHMI/Janelia), prepared for imaging by Gleb Shtengel (HHMI/Janelia), with imaging and post-processing by C. Shan Xu (HHMI/Janelia)  
*Publication:* (Xu et al., 2021)  
*Voxel size:* 4 nm x 4 nm x 5.2 nm

**Cell 20**

*Description:* HeLa-3 Wild-type, interphase HeLa cell (ATCC CCL-2)  
*Protocol:* HPFS  
*Contributions:* Sample provided by Aubrey Weigel (HHMI/Janelia), prepared for imaging by Gleb Shtengel (HHMI/Janelia), with imaging and post-processing by C. Shan Xu (HHMI/Janelia)  
*Publication:* (Xu et al., 2021)  
*Voxel size:* 4 nm x 4 nm x 3.2 nm

**Cell 21**

*Description:* Jurkat-1 Wild-type, Clone E6-1 (ATCC TIB-152)  
*Protocol:* HPFS  
*Contributions:* Sample provided by Huxley Hoffman and Schuyler van Engelenburg (U. Denver), prepared for imaging by Gleb Shtengel (HHMI/Janelia), with imaging and post-processing by C. Shan Xu (HHMI/Janelia).  
*Publication:* (Xu et al., 2021)  
*Voxel size:* 4 nm x 4 nm x 3.4 nm

**Cell 22**

*Description:* Macrophage-2, Wild-type THP-1 macrophage. THP-1 human monocyte cell line (ATC TIB-202) treated with PMA to differentiate into macrophages.  
*Protocol:* HPFS  
*Contributions:* Sample provided by Aubrey Weigel (HHMI/Janelia), prepared for imaging by Gleb Shtengel (HHMI/Janelia), with imaging and post-processing by C. Shan Xu (HHMI/Janelia)  
*Publication:* (Xu et al., 2021)  
*Voxel size:* 4 nm x 4 nm x 3.4 nm

Description for each sample includes cell type, fixation protocol (CF or HPFS), source and FIB-SEM resolution.

**Supplementary References**

Chou, Y.-Y., Krupp, A., Kaynor, C., Gaudin, R., Ma, M., Cahir-McFarland, E., and Kirchhausen, T. (2016a). Inhibition of JCPyV infection mediated by targeted viral genome editing using CRISPR/Cas9. *Scientific Reports* 6, 36921.

Chou, Y.-Y., Cuevas, C., Carocci, M., Stubbs, S.H., Ma, M., Cureton, D.K., Chao, L., Evesson, F., He, K., Yang, P.L., et al. (2016b). Identification and characterization of a novel broad spectrum virus entry inhibitor. *J Virol* 90, 4494–4510.

Chou, Y.-Y., Upadhyayula, S., Houser, J., He, K., Skillern, W., Scanavachi, G., Dang, S., Sanyal, A., Ohashi, K.G., Caprio, G.D., et al. (2021). Inherited nuclear pore substructures template post-mitotic pore assembly. *Developmental Cell*.

Ehrlich, M., Boll, W., Oijen, A. van, Hariharan, R., Chandran, K., Nibert, M.L., and Kirchhausen, T. (2004). Endocytosis by random initiation and stabilization of clathrin-coated pits. *Cell* 118, 591–605.

Xu, C.S., Pang, S., Shtengel, G., Müller, A., Ritter, A.T., Hoffman, H.K., Takemura, S., Lu, Z., Pasolli, H.A., Iyer, N., et al. (2021). An open-access volume electron microscopy atlas of whole cells and tissues. *Nature* 599, 147–151.



**Table S2. Size of hold out volumes containing ground truths and their use for model training, validation and prediction**

| Cell | Cell type                  | Laboratory            | Fixation Protocol | Voxel size<br>nm<br>(x, y, z) | Use                  |
|------|----------------------------|-----------------------|-------------------|-------------------------------|----------------------|
| 1    | HEK293A<br>interphase      | this study            | CF                | 5 x 5 x 5                     | training, validation |
| 2    | HEK293A<br>interphase      | this study            | CF                | 5 x 5 x 5                     | training, validation |
| 3    | BSC-1<br>interphase        | this study            | CF                | 5 x 5 x 5                     | validation           |
| 6    | SUM 159<br>interphase      | this study            | CF                | 5 x 5 x 5                     | validation           |
| 8    | SUM 159<br>prometaphase    | this study            | CF                | 10 x 10 x 10                  | prediction           |
| 9    | SUM 159<br>interphase      | this study            | CF                | 10 x 10 x 10                  | prediction           |
| 12   | HeLa<br>interphase         | this study            | HPFS              | 5 x 5 x 5                     | training, prediction |
| 13   | HeLa<br>interphase         | this study            | HPFS              | 5 x 5 x 5                     | training, prediction |
| 13a  | SVG-A<br>interphase        | this study            | HPFS              | 5 x 5 x 5                     | training, prediction |
| 15   | SVG-A<br>interphase        | this study            | HPFS              | 5 x 5 x 5                     | prediction           |
| 16   | SVGA<br>interphase         | this study            | HPFS              | 5 x 5 x 5                     | prediction           |
| 17   | SVG-A<br>interphase        | this study            | HPFS              | 5 x 5 x 5                     | prediction           |
| 19   | HeLa-2<br>interphase       | COSEM<br>HHMI/Janelia | HPFS              | 4 x 4 x 5.2                   | training, validation |
| 20   | HeLa-3<br>interphase       | COSEM<br>HHMI/Janelia | HPFS              | 4 x 4 x 3.2                   | training, validation |
| 21   | Jurkat-1<br>interphase     | COSEM<br>HHMI/Janelia | HPFS              | 4 x 4 x 3.4                   | validation           |
| 22   | Macrophage-2<br>interphase | COSEM<br>HHMI/Janelia | HPFS              | 4 x 4 x 3.4                   | validation           |

Description for each sample includes cell type, stage during cell cycle, fixation protocol (CF or HPFS), FIB-SEM resolution and use of the ground truths for model training, validation and prediction.

**Table S3. Modes of data augmentation used in this study**

| Augmentation | Parameter             | Value           |
|--------------|-----------------------|-----------------|
| Mirror       | axes                  | x, y, z         |
| Transpose    | axes                  | x, y, z         |
| Elastic      | control point spacing | 32, 32, 32      |
|              | jitter sigma          | 2, 2, 2         |
|              | subsample             | 4               |
| Rotation     | axes                  | x, y            |
| Mirror       | axes                  | x, y, z         |
| Transpose    | axes                  | x, y, z         |
| Intensity    | scale                 | in [0.85, 1.15] |
|              | shift                 | in [0.85, 1.15] |

Type of augmentation and parameters to modify the ground truths used during model training. Their detailed description is found in GUNPOWDER (<http://funkey.science/gunpowder/api.html#augmentation-nodes>). Since the rotation operation was performed in two dimensions, it was necessary to perform twice the mirror and transpose operations in order to obtain all possible orientations of the hold block containing the ground truth.

**Table S4. Procedures used to generate ground truths**

| Cell | Structure           | Method used to generate ground truth | Voxel Size (nm) (x, y, z) | Training Block Size (um <sup>3</sup> ) ROI (voxels)                                              | Validation Block Size (um <sup>3</sup> ) ROI (voxels) |
|------|---------------------|--------------------------------------|---------------------------|--------------------------------------------------------------------------------------------------|-------------------------------------------------------|
| 1    | Mitochondria        | lIastik                              | 5 x 5 x 5                 | 57.8 um <sup>3</sup><br>1200 x 700 x 550                                                         | 22.5 um <sup>3</sup><br>600 x 400 x 750               |
| 2    | Mitochondria        | lIastik, VAST                        | 5 x 5 x 5                 | 80.4 um <sup>3</sup><br>650 x 900 x 1100                                                         | 15.3 um <sup>3</sup><br>450 x 800 x 340               |
| 3    | Mitochondria        | lIastik, VAST                        | 5 x 5 x 5                 | -                                                                                                | 35.4 um <sup>3</sup><br>700 x 540 x 750               |
| 6    | Mitochondria        | lIastik, VAST                        | 5 x 5 x 5                 | -                                                                                                | 7.6 um <sup>3</sup><br>241 x 476 x 528                |
| 1    | ER                  | GC, VAST                             | 5 x 5 x 5                 | 59.7 um <sup>3</sup><br>600 x 590 x 1350                                                         | 11.1 um <sup>3</sup><br>600 x 590 x 250               |
| 2    | ER                  | GC                                   | 5 x 5 x 5                 | 14.8 um <sup>3</sup><br>500 x 395 x 600                                                          | 4.6 um <sup>3</sup><br>300 x 205 x 600                |
| 3    | ER                  | GC                                   | 5 x 5 x 5                 | -                                                                                                | 2.1 um <sup>3</sup><br>204 x 204 x 400                |
| 6    | ER                  | GC, VAST                             | 5 x 5 x 5                 | -                                                                                                | 7.5 um <sup>3</sup><br>241 x 476 x 528                |
| 1    | Golgi               | GC                                   | 5 x 5 x 5                 | 47.1 um <sup>3</sup><br>469 x 650 x 510<br>400 x 400 x 875<br>350 x 400 x 400<br>230 x 250 x 440 | 105 um <sup>3</sup><br>5250 x 400 x 400               |
| 2    | Golgi               | GC                                   | 5 x 5 x 5                 | 9.4 um <sup>3</sup><br>300 x 500 x 500                                                           | 5.2 um <sup>3</sup><br>230 x 400 x 450                |
| 3    | Golgi               | GC, VAST                             | 5 x 5 x 5                 | -                                                                                                | 2.8 um <sup>3</sup><br>210 x 283 x 371                |
| 6    | Golgi               | GC, VAST                             | 5 x 5 x 5                 | -                                                                                                | 3.1 um <sup>3</sup><br>284 x 204 x 424                |
| 12   | Clathrin coated pit | VAST                                 | 5 x 5 x 5                 | 1 um <sup>3</sup><br>6 [110 x 110 x 110]                                                         | .33 um <sup>3</sup><br>2 [110 X 110 X 110]            |
| 13   | Clathrin coated pit | VAST                                 | 5 x 5 x 5                 | 1.5 um <sup>3</sup><br>9 [110 x 110 x 110]                                                       | .33 um <sup>3</sup><br>2 [110 X 110 X 110]            |
| 13   | ER                  | GC, VAST                             | 5 x 5 x 5                 | 2.03 um <sup>3</sup><br>110 x 290 x 510                                                          | -                                                     |
| 13   | Mitochondria        | lIastik, VAST                        | 5 x 5 x 5                 | 1 um <sup>3</sup><br>200 x 200 x 200                                                             | -                                                     |
| 13a  | Nuclear pore        | VAST                                 | 5 x 5 x 5                 | 1.33 um <sup>3</sup><br>8 [110 x 110 x 110]                                                      | .33 um <sup>3</sup><br>2 [110 x 110 x 110]            |

|    |              |                                                                 |             |                                                                                                                                        |                                         |
|----|--------------|-----------------------------------------------------------------|-------------|----------------------------------------------------------------------------------------------------------------------------------------|-----------------------------------------|
| 20 | Mitochondria | OpenOrganelle<br>(Heinrich et al.,<br>2021; Xu et al.,<br>2021) | 4 x 4 x 3.2 | 4.51 $\mu\text{m}^3$<br>500 x 250 x 500<br>200 x 200 x 200                                                                             | 0.52 $\mu\text{m}^3$<br>200 x 200 x 200 |
| 21 | Mitochondria | OpenOrganelle<br>(Heinrich et al.,<br>2021; Xu et al.,<br>2021) | 4 x 4 x 3.4 | -                                                                                                                                      | 1.07 $\mu\text{m}^3$<br>256 x 256 x 256 |
| 22 | Mitochondria | OpenOrganelle<br>(Heinrich et al.,<br>2021; Xu et al.,<br>2021) | 4 x 4 x 3.4 | -                                                                                                                                      | 0.22 $\mu\text{m}^3$<br>150 x 150 x 150 |
| 19 | ER           | OpenOrganelle<br>(Heinrich et al.,<br>2021; Xu et al.,<br>2021) | 4 x 4 x 5.2 | 9.96 $\mu\text{m}^3$<br>250 x 500 x 500<br>200 x 200 x 200<br>250 x 250 x 250<br>200 x 200 x 200<br>250 x 400 x 400<br>238 x 300 x 300 | 1 $\mu\text{m}^3$<br>250 x 250 x 250    |
| 20 | ER           | OpenOrganelle<br>(Heinrich et al.,<br>2021; Xu et al.,<br>2021) | 4 x 4 x 3.2 | 4.51 $\mu\text{m}^3$<br>500 x 250 x 500<br>200 x 200 x 200                                                                             | 1.07 $\mu\text{m}^3$<br>256 x 256 x 256 |
| 21 | ER           | OpenOrganelle<br>(Heinrich et al.,<br>2021; Xu et al.,<br>2021) | 4 x 4 x 3.4 | -                                                                                                                                      | 4 $\mu\text{m}^3$<br>500 x 250 x 500    |
| 22 | ER           | OpenOrganelle<br>(Heinrich et al.,<br>2021; Xu et al.,<br>2021) | 4 x 4 x 3.4 | -                                                                                                                                      | 4.02 $\mu\text{m}^3$<br>501 x 250 x 502 |

Description of cells, procedures used to generate ground truths (see methods for details), resolution of FIB-SEM data and size of hold out volumes used for training and validation.

**Table S5. Effect of CLAHE on prediction performance of the model**

| Validation blocks in cell | Mitochondria                |                             |                             |                             | Golgi                       |                             |                             |                             | ER                          |                             |                             |                             |
|---------------------------|-----------------------------|-----------------------------|-----------------------------|-----------------------------|-----------------------------|-----------------------------|-----------------------------|-----------------------------|-----------------------------|-----------------------------|-----------------------------|-----------------------------|
|                           | 1                           | 2                           | 3<br><i>naive</i>           | 6<br><i>naive</i>           | 1                           | 2                           | 3<br><i>naive</i>           | 6<br><i>naive</i>           | 1                           | 2                           | 3<br><i>naive</i>           | 6<br><i>naive</i>           |
| without normalization     | 0.98±<br>0.01               | <b>0.92±</b><br><b>0.02</b> | 0.73±<br>0.04               | 0.88±<br>0.02               | 0.69±<br>0.03               | 0.68±<br>0.04               | 0.55±<br>0.02               | <b>0.80±</b><br><b>0.02</b> | 0.93±<br>0.01               | 0.87±<br>0.04               | 0.91±<br>0.01               | 0.83±<br>0.02               |
| Linear rescale            | 0.96±<br>0.01               | <b>0.92±</b><br><b>0.03</b> | 0.64±<br>0.07               | <b>0.90±</b><br><b>0.02</b> | 0.68±<br>0.05               | 0.71±<br>0.04               | 0.51±<br>0.02               | 0.74±<br>0.05               | <b>0.96±</b><br><b>0.01</b> | <b>0.92±</b><br><b>0.01</b> | 0.91±<br>0.01               | <b>0.87±</b><br><b>0.01</b> |
| histogram equalization    | 0.96±<br>0.02               | 0.85±<br>0.04               | 0.71±<br>0.05               | 0.84±<br>0.06               | 0.61±<br>0.08               | <b>0.74±</b><br><b>0.17</b> | 0.64±<br>0.06               | 0.36±<br>0.10               | 0.90±<br>0.02               | 0.87±<br>0.03               | 0.91±<br>0.02               | 0.83±<br>0.03               |
| CLAHE clip 1%             | 0.97±<br>0.01               | <b>0.92±</b><br><b>0.02</b> | 0.73±<br>0.03               | 0.87±<br>0.01               | <b>0.70±</b><br><b>0.04</b> | 0.67±<br>0.03               | 0.52±<br>0.02               | 0.77±<br>0.03               | 0.95±<br>0.01               | 0.91±<br>0.01               | 0.91±<br>0.01               | 0.85±<br>0.01               |
| CLAHE clip 2%             | 0.96±<br>0.02               | 0.87±<br>0.03               | 0.75±<br>0.05               | 0.88±<br>0.03               | 0.56±<br>0.08               | 0.69±<br>0.05               | 0.56±<br>0.04               | 0.79±<br>0.02               | 0.95±<br>0.01               | 0.89±<br>0.04               | <b>0.92±</b><br><b>0.01</b> | 0.77±<br>0.04               |
| CLAHE clip 3%             | <b>0.99±</b><br><b>0.00</b> | 0.89±<br>0.02               | <b>0.81±</b><br><b>0.03</b> | 0.89±<br>0.01               | 0.68±<br>0.15               | 0.69±<br>0.12               | <b>0.66±</b><br><b>0.06</b> | 0.37±<br>0.25               | 0.91±<br>0.02               | 0.84±<br>0.06               | 0.91±<br>0.02               | 0.72±<br>0.05               |

F1 prediction scores using the indicated cells were obtained with models trained with combined FIB-SEM data from cells 1 and 2 subjected or not to the indicated types of signal normalization. F1 data for each organelle corresponds to the average +/- SD from 20 consecutive predictions obtained every 1000 iterations initiated after about 150,000 training iterations. Best results are highlighted in bold. Inspection of the data shows no consistent improvement in the F1 predictions scores upon signal normalization including CLAHE.

**Table S6. Comparative examples of predictive performance by models trained with data from one or two cells**

| Structure Fixation                | F1 for model trained using Cell 1 |                |                |                | F1 for model trained using Cell 2 |          |                |                | F1 for model trained using Cells 1+2 or Cells 19 + 20 |           |                 |                 |
|-----------------------------------|-----------------------------------|----------------|----------------|----------------|-----------------------------------|----------|----------------|----------------|-------------------------------------------------------|-----------|-----------------|-----------------|
|                                   | <i>1</i>                          | <i>2 naive</i> | <i>3 naive</i> | <i>6 naive</i> | <i>1 naive</i>                    | <i>2</i> | <i>3 naive</i> | <i>6 naive</i> | <i>1</i>                                              | <i>2</i>  | <i>3 naive</i>  | <i>6 naive</i>  |
| <b>Mitochondria CF</b>            | 0.91                              | 0.47           | 0.66           | 0.81           | 0.89                              | 0.87     | 0.74           | 0.7            | 0.96                                                  | 0.87      | 0.75            | 0.88            |
| <b>ER CF</b>                      | 0.86                              | 0.29           | 0.7            | 0.52           | 0.16                              | 0.90     | 0.83           | 0.55           | 0.95                                                  | 0.90      | 0.92            | 0.77            |
| <b>Golgi CF</b>                   | 0.45                              | 0.68           | 0.61           | 0.73           | 0.18                              | 0.62     | 0.48           | 0.77           | 0.56                                                  | 0.69      | 0.56            | 0.79            |
| <b>Cells used for predictions</b> |                                   |                |                |                |                                   |          |                |                | <b>19</b>                                             | <b>20</b> | <b>21 naive</b> | <b>22 naive</b> |
| <b>Mitochondria HPFS</b>          |                                   |                |                |                |                                   |          |                |                | 1                                                     | 1         | 0.94            | 0.93            |
| <b>ER HPFS</b>                    |                                   |                |                |                |                                   |          |                |                | 0.91                                                  | 0.80      | 0.48            | 0.81            |

The neural network was trained using ground truths from the indicated cells, alone or in combination, and the resulting models then used to predict from images of the listed individual cells. The data show F1 prediction scores using validation ground truths not employed for training.

**Table S7. Comparison of model performance using the ASEM (this study) and COSEM training and prediction pipelines**

| Source                                        | Structure<br>Fixation | Post<br>Processing | Training Model #               |             |            |                                                         | F1 for the<br>indicated<br>cells used<br>for training |      | F1 for<br>naive cells |      | Fine-<br>tuning<br>Training<br>Iterations<br>(x1000) |     | F1 after<br>fine-tuning |      |
|-----------------------------------------------|-----------------------|--------------------|--------------------------------|-------------|------------|---------------------------------------------------------|-------------------------------------------------------|------|-----------------------|------|------------------------------------------------------|-----|-------------------------|------|
|                                               |                       |                    | Training iterations<br>(x1000) |             |            |                                                         | 19                                                    | 20   | 21                    | 22   | 21                                                   | 22  | 21                      | 22   |
| <i>Cells training<br/>and<br/>predictions</i> |                       |                    | 19 + 20                        |             |            |                                                         |                                                       |      |                       |      |                                                      |     |                         |      |
| this study                                    | Mitochondria<br>HPFS  | No                 | 1675<br>95-115                 |             |            |                                                         | 0.99                                                  | 0.99 | 0.94                  | 0.93 | 2-7                                                  | 2-7 | 0.93                    | 0.98 |
| this study                                    | ER<br>HPFS            | No                 | 1669<br>180-200                |             |            |                                                         | 0.91                                                  | 0.80 | 0.48                  | 0.81 | 7-12                                                 | 1-6 | 0.69                    | 0.90 |
|                                               |                       |                    |                                |             |            | <b>F1 for the indicated<br/>cells used for training</b> |                                                       |      |                       |      |                                                      |     |                         |      |
| <i>Cells training<br/>and<br/>predictions</i> |                       |                    | 19                             | 20          | 21         | 22                                                      | 19                                                    | 20   | 21                    | 22   |                                                      |     |                         |      |
| COSEM                                         | Mitochondria<br>HPFS  | Yes                | Few<br>575                     | All<br>825  | All<br>875 | Many<br>110                                             | 0.93                                                  | 0.97 | 0.98                  | N/A  | -                                                    | -   | -                       | -    |
| COSEM                                         | ER<br>HPFS            | Yes                | Many<br>625                    | All<br>1075 | Few<br>625 | Many<br>650                                             | 0.84                                                  | 0.71 | 0.75                  | 0.97 | -                                                    | -   | -                       | -    |

The neural networks used in this study or by the COSEM Project (Heinrich et al., 2021) were trained to predict mitochondria and ER using ground truths from the indicated cells, alone (COSEM Project) or in combination (this study). The data show F1 prediction scores using validation ground truths not employed for training. In this study we only used data from one organelle at a time to train the neural network and report the results for the defined number of training iterations chosen when the performance of the model reached stability; Reported F1 scores are the average of 20 consecutive values obtained every 1,000 training iterations determined after the indicated training iteration. The COSEM project simultaneously used data from more than one organelle to train the neural network according to the details described in (Heinrich et al., 2021). The F1 values for the COSEM Project reported in Tables 1 & 2 (Heinrich et al., 2021) correspond to their best results by different trained networks and training iterations using ground annotations for 'few', 'many' or 'all' organelles including mitochondria and ER present within the holding block.

**Table S8. Comparative examples of predictive performance by models trained with data from cells prepared with the same or different fixation protocols**

| Structure Fixation                               | Training iterations (x1000) | F1 for model trained using indicated cells | F1 for naive cells                | Fine-tuning training iterations (x1000) | F1 after fine-tuning with naive cells |
|--------------------------------------------------|-----------------------------|--------------------------------------------|-----------------------------------|-----------------------------------------|---------------------------------------|
| <i>Cells used for training &amp; predictions</i> |                             | <b>1, 2 (CF)</b>                           |                                   |                                         |                                       |
| <i>Cells used for predictions</i>                |                             |                                            | <b>3, 6 (CF)</b>                  |                                         | <b>3, 6 (CF)</b>                      |
| <b>Mitochondria</b>                              | 95-115                      | 0.96<br>0.87                               | 0.75<br>0.88                      | 1-6<br>1-6                              | 0.88<br>0.89                          |
| <b>ER</b>                                        | 115-135                     | 0.95<br>0.90                               | 0.92<br>0.77                      | -                                       | -                                     |
| <b>Golgi</b>                                     | 35-55                       | 0.56<br>0.69                               | 0.56<br>0.79                      | -                                       | -                                     |
| <i>Cells used for training &amp; predictions</i> |                             | <b>19, 20 (HPFS)</b>                       |                                   |                                         |                                       |
| <i>Cells used for predictions</i>                |                             |                                            | <b>21, 22 (HPFS)</b>              |                                         | <b>21, 22 (HPFS)</b>                  |
| <b>Mitochondria</b>                              | 95-115                      | 0.99<br>0.99                               | 0.94<br>0.93                      | 2-7<br>2-7                              | 0.93<br>0.98                          |
| <b>ER</b>                                        | 180-200                     | 0.91<br>0.80                               | 0.48<br>0.81                      | 7-12<br>1-6                             | 0.69<br>0.90                          |
| <i>Cells used for training &amp; predictions</i> |                             | <b>1,2 (CF)<br/>21, 22 (HPFS)</b>          |                                   |                                         |                                       |
| <i>Cells used for predictions</i>                |                             |                                            | <b>3,6 (CF)<br/>21, 22 (HPFS)</b> |                                         | <b>3, 6 (CF)<br/>21, 22 (HPFS)</b>    |
| <b>Mitochondria</b>                              | 135-155                     | 0.95<br>0.81<br>0.93<br>0.99               | 0.73<br>0.77<br>0.96<br>0.89      | -<br>1-6<br>-<br>-                      | -<br>0.90<br>-<br>-                   |
| <b>ER</b>                                        | 100-120                     | 0.94<br>0.90<br>0.84<br>0.74               | 0.85<br>0.82<br>0.58<br>0.81      | -<br>-<br>1-6<br>-                      | -<br>-<br>0.68<br>-                   |
| <i>Cells used for training &amp; predictions</i> |                             | <b>13a (HPFS)</b>                          |                                   |                                         |                                       |



|                                                         |         |                  |                  |  |  |
|---------------------------------------------------------|---------|------------------|------------------|--|--|
| <b>Nuclear pores</b>                                    | 130-150 | 0.52             | -                |  |  |
| <b><i>Cells used for training &amp; predictions</i></b> |         | <b>13 (HPFS)</b> |                  |  |  |
| <b><i>Cells used for predictions</i></b>                |         |                  | <b>12 (HPFS)</b> |  |  |
| <b>Clathrin-coated pits/ vesicles</b>                   | 80-100  | 0.67             | 0.69             |  |  |

The neural network was trained using ground truths from the indicated cells prepared with different fixation protocols, alone or in combination, and the resulting models then used to predict from images of the individual cells listed in the table. The data show F1 prediction scores using validation ground truths not employed for training.

**Table S9. Summary of experiments used to test the effect of fine-tuning**

| Structure            | Training cells                          | Training iterations (x1000) | Cell              | Cell                                                | Cell                           | Cell                 |
|----------------------|-----------------------------------------|-----------------------------|-------------------|-----------------------------------------------------|--------------------------------|----------------------|
| Fixation Protocol    | ground-truth volume [ $\mu\text{m}^3$ ] |                             | F1 prediction     | fine-tuning ground-truth volume [ $\mu\text{m}^3$ ] | Fine-tuning iterations (x1000) | F1 after fine-tuning |
| Mitochondria<br>CF   | 1 + 2<br>138.2 $\mu\text{m}^3$          | 95                          | 3, naïve<br>0.75  | 3, naïve<br>1.95 $\mu\text{m}^3$                    | 3, naïve<br>6                  | 3, naïve<br>0.88     |
|                      |                                         |                             | 6, naïve<br>0.88  | 6, naïve<br>1.15 $\mu\text{m}^3$                    | 6, naïve<br>6                  | 6, naïve<br>0.89     |
| Mitochondria<br>HPFS | 19 + 20<br>12.12 $\mu\text{m}^3$        | 95                          | 21, naïve<br>0.94 | 21, naïve<br>4.00 $\mu\text{m}^3$                   | 21, naïve<br>7                 | 21, naïve<br>0.93    |
|                      |                                         |                             | 22, naïve<br>0.93 | 22, naïve<br>4.02 $\mu\text{m}^3$                   | 22, naïve<br>7                 | 22<br>0.98           |
| ER<br>HPFS           | 19 + 20<br>4.85 $\mu\text{m}^3$         | 180                         | 21, naïve<br>0.48 | 21, naïve<br>1.07 $\mu\text{m}^3$                   | 21, naïve<br>12                | 21, naïve<br>0.69    |
|                      |                                         |                             | 22, naïve<br>0.81 | 22, naïve<br>0.52 $\mu\text{m}^3$                   | 22, naïve<br>6                 | 22, naïve<br>0.90    |

Description of models, cells, hold out volumes containing ground truths employed for model training and validation in experiments to test the effect of fine-tuning.
